# Supplementary material
Source: publisher figshare collection journal article supplement (https://acs.figshare.com/ndownloader/files/4397752)

## Supporting Information

### Synthesis of 3,3-Disubstituted Oxindoles by Palladium-Catalyzed Tandem Reaction of 2-(Alkynyl)aryl Isocyanates with Benzylic Alcohols

Takeharu Toyoshima, Yusuke Mikano, Tomoya Miura, and Masahiro Murakami\*

Department of Synthetic Chemistry and Biological Chemistry, Kyoto University,  
Katsura, Kyoto 615-8510, Japan

#### Table of Contents:

|        |                                                                                                                                                                                                                                                       |
|--------|-------------------------------------------------------------------------------------------------------------------------------------------------------------------------------------------------------------------------------------------------------|
| S2     | General Methods and Materials<br>Typical Procedure for Pd(0)-Catalyzed Cyclization/[1,3] Rearrangement Reaction of <b>1a</b> with Benzyl Alcohol ( <b>2a</b> ) (Table 1, entry 6)<br>Spectroscopic Data ( <b>4aa</b> , <b>4ab</b> )                   |
| S3     | Spectroscopic Data ( <b>4ac</b> , <b>4ad</b> , <b>4ae</b> , <b>4af</b> , <b>4ag</b> , <b>4ah</b> , <b>4bd</b> )<br>Optical rotation/HPLC ( <b>4bd</b> )                                                                                               |
| S4     | Typical procedure for Pd(0)-Catalyzed Cyclization/[1,3] Rearrangement Reaction of <b>1a</b> with Allyl Alcohol ( <b>5a</b> ) (Table 3, entry 1)<br>Spectroscopic Data ( <b>4bf</b> , <b>4ca</b> , <b>6aa</b> , <b>6ab</b> , <b>6ac</b> , <b>6ad</b> ) |
| S5     | Typical procedure for Pd(0)-Catalyzed Cyclization/[1,3] Rearrangement/Allylation Reaction of <b>1a</b> with Allyl Alcohol ( <b>5a</b> ) (Table 4)<br>Spectroscopic Data ( <b>6bd</b> , <b>6ae</b> , <b>6af</b> , <b>7aa</b> , <b>7ab</b> )            |
| S6     | Spectroscopic Data ( <b>7ac</b> )<br>Cross-over Experiment on the Reaction with <b>3aa</b> and <b>3dc</b>                                                                                                                                             |
| S7–8   | <sup>1</sup> H and <sup>13</sup> C NMR Spectra of <b>4aa</b>                                                                                                                                                                                          |
| S9–10  | <sup>1</sup> H and <sup>13</sup> C NMR Spectra of <b>4ab</b>                                                                                                                                                                                          |
| S11–12 | <sup>1</sup> H and <sup>13</sup> C NMR Spectra of <b>4ac</b>                                                                                                                                                                                          |
| S13–14 | <sup>1</sup> H and <sup>13</sup> C NMR Spectra of <b>4ad</b>                                                                                                                                                                                          |
| S15–16 | <sup>1</sup> H and <sup>13</sup> C NMR Spectra of <b>4ae</b>                                                                                                                                                                                          |
| S17–18 | <sup>1</sup> H and <sup>13</sup> C NMR Spectra of <b>4af</b>                                                                                                                                                                                          |
| S19–20 | <sup>1</sup> H and <sup>13</sup> C NMR Spectra of <b>4ag</b>                                                                                                                                                                                          |
| S21–22 | <sup>1</sup> H and <sup>13</sup> C NMR Spectra of <b>4ah</b>                                                                                                                                                                                          |
| S23–24 | <sup>1</sup> H and <sup>13</sup> C NMR Spectra of <b>4bd</b>                                                                                                                                                                                          |
| S25–26 | <sup>1</sup> H and <sup>13</sup> C NMR Spectra of <b>4bf</b>                                                                                                                                                                                          |
| S27–28 | <sup>1</sup> H and <sup>13</sup> C NMR Spectra of <b>4ca</b>                                                                                                                                                                                          |
| S29–30 | <sup>1</sup> H and <sup>13</sup> C NMR Spectra of <b>6aa</b>                                                                                                                                                                                          |
| S31–32 | <sup>1</sup> H and <sup>13</sup> C NMR Spectra of <b>6ab</b>                                                                                                                                                                                          |
| S33–34 | <sup>1</sup> H and <sup>13</sup> C NMR Spectra of <b>6ac</b>                                                                                                                                                                                          |
| S35–36 | <sup>1</sup> H and <sup>13</sup> C NMR Spectra of <b>6ad</b>                                                                                                                                                                                          |
| S37–38 | <sup>1</sup> H and <sup>13</sup> C NMR Spectra of <b>6bd</b>                                                                                                                                                                                          |
| S39–40 | <sup>1</sup> H and <sup>13</sup> C NMR Spectra of <b>6ae</b>                                                                                                                                                                                          |
| S41–42 | <sup>1</sup> H and <sup>13</sup> C NMR Spectra of <b>6af</b>                                                                                                                                                                                          |
| S43–44 | <sup>1</sup> H and <sup>13</sup> C NMR Spectra of <b>7aa</b>                                                                                                                                                                                          |
| S45–46 | <sup>1</sup> H and <sup>13</sup> C NMR Spectra of <b>7ab</b>                                                                                                                                                                                          |
| S47–48 | <sup>1</sup> H and <sup>13</sup> C NMR Spectra of <b>7ac</b>                                                                                                                                                                                          |

**General Methods.** All reactions were carried out with standard Schlenk techniques under an argon atmosphere. Infrared spectra were recorded on a Shimadzu FTIR-8100 spectrometer or a Shimadzu FTIR-8400 spectrophotometer.  $^1\text{H}$  and  $^{13}\text{C}$  NMR spectra were recorded on a Varian Gemini 2000 ( $^1\text{H}$  at 300.07 MHz and  $^{13}\text{C}$  at 75.46 MHz) spectrometer or a Varian Mercury-vx400 ( $^1\text{H}$  at 400.44 MHz and  $^{13}\text{C}$  at 100.69 MHz) spectrometer. NMR data were obtained in  $\text{CDCl}_3$ . Proton chemical shifts were referenced to the residual proton signal of the solvent at 7.26 ppm ( $\text{CHCl}_3$ ). Carbon chemical shifts were referenced to the carbon signal of the solvent at 77.0 ppm ( $\text{CDCl}_3$ ). High-resolution mass spectra were recorded on a JEOL JMS-SX102A spectrometer. Optical rotations were measured on a JASCO P-1020 polarimeter with a sodium lamp. HPLC analysis was performed by a Waters alliance 2695 system. GC analysis was carried out using a Shimadzu GC-2010 gas chromatograph. Gel permeation chromatography (GPC) was carried out with a Japan Analytical Industry LC-908. Flash column chromatography was performed with silica gel 60N (Kanto). Preparative thin-layer chromatography (PTLC) was performed on silica gel plates with PF254 indicator (Merck).

**Materials.** THF, 1,4-dioxane, toluene, and DME were distilled from sodium/benzophenone ketyl. All benzylic or allylic alcohols **2** and **5** were purchased, and purified by distillation, recrystallization or flash column chromatography prior to use.  $\text{CpPd}(\pi\text{-allyl})$  was prepared according to the literature method.<sup>1</sup> 2-(Alkynyl)anilines were prepared by Sonogashira reaction of the corresponding 2-iodoaniline derivatives with alkyne.<sup>2</sup> 2-(Alkynyl)aryl isocyanates were synthesized from the corresponding 2-(alkynyl)aniline according to the reported procedure.<sup>3</sup> The analytical data of compounds **1a**,<sup>4</sup> **1b**,<sup>4</sup> **1c**,<sup>5</sup> and **1d**<sup>4</sup> have been already reported. **3aa** and **3dc** were synthesized according to the reported procedure.<sup>6</sup>

**Typical procedure for Pd(0)-Catalyzed Cyclization/[1,3] Rearrangement Reaction of 1a with Benzyl Alcohol (2a) (Table 1, entry 6).** To an oven-dried flask equipped with a stirrer bar was added  $\text{CpPd}(\pi\text{-allyl})$  (2.1 mg, 10  $\mu\text{mol}$ , 5 mol % Pd) and dppf (5.5 mg, 10  $\mu\text{mol}$ , 5 mol %). The flask was sealed with a rubber septum, evacuated and refilled with argon three times. Then, a solution of benzyl alcohol **2a** (61.8  $\mu\text{L}$ , 0.6 mmol, 3.0 equiv) and substrate **1a** (39.8 mg, 0.20 mmol, 1.0 equiv) in dry toluene (2.0 mL) was added *via* syringe. After being heated at 80  $^\circ\text{C}$  for 12 h, the reaction mixture was cooled to room temperature. The resulting mixture was passed through a pad of Florisil<sup>®</sup> and eluted with ethyl acetate. The filtrate was concentrated under reduced pressure. The residue was purified by gel permeation chromatography (GPC,  $\text{CHCl}_3$ ) to give product **4aa** (42.4 mg, 0.138 mmol, 69%).

**4aa:** Purified by GPC ( $\text{CHCl}_3$ ): IR (KBr): 3250, 1717, 1678, 1474, 1339  $\text{cm}^{-1}$ ;  $^1\text{H}$  NMR (300 MHz):  $\delta$  = 0.78 (t,  $J$  = 7.2 Hz, 3H), 1.06–1.23 (m, 2H), 1.38–1.55 (m, 2H), 2.18 (ddd,  $J$  = 17.7, 8.1, 6.9 Hz, 1H), 2.50 (ddd,  $J$  = 17.7, 7.8, 6.3 Hz, 1H), 3.44 (d,  $J$  = 13.8 Hz, 1H), 3.52 (d,  $J$  = 13.2 Hz, 1H), 6.70 (d,  $J$  = 7.8 Hz, 1H), 6.83–6.88 (m, 2H), 6.98–7.11 (m, 4H), 7.17–7.25 (m, 2H), 7.46 (br s, 1H);  $^{13}\text{C}$  NMR (75 MHz):  $\delta$  = 13.7, 21.9, 25.4, 38.8, 38.9, 68.4, 110.0, 122.8, 124.5, 126.5, 127.5, 127.6, 129.1, 129.8, 135.0, 141.4, 176.9, 202.7; HRMS ( $\text{EI}^+$ ): Calcd for  $\text{C}_{20}\text{H}_{21}\text{NO}_2$ ,  $\text{M}^+$  307.1572. Found  $m/z$  307.1569.

**4ab:** Purified by GPC ( $\text{CHCl}_3$ ): IR (KBr): 3200, 1717, 1698, 1472, 1339  $\text{cm}^{-1}$ ;  $^1\text{H}$  NMR (400 MHz):  $\delta$  = 0.78 (t,  $J$  = 7.2 Hz, 3H), 1.06–1.24 (m, 2H), 1.42–1.59 (m, 2H), 2.11–2.21 (m, 1H), 2.43–2.54 (m, 1H), 4.00 (d,  $J$  = 14.4 Hz, 1H), 4.05 (d,  $J$  = 14.4 Hz, 1H), 6.61 (d,  $J$  = 8.0 Hz, 1H), 6.93 (td,  $J$  = 7.6, 0.8 Hz, 1H), 7.04 (dd,  $J$  = 7.2, 1.2 Hz, 1H), 7.08–7.14 (m, 2H), 7.17 (d,  $J$  = 8.0 Hz, 1H), 7.30–7.38 (m, 2H), 7.57 (d,  $J$  = 8.0 Hz, 1H), 7.65–7.70 (m, 1H), 7.76 (br s, 1H), 8.06 (d,  $J$  = 7.2 Hz, 1H);  $^{13}\text{C}$  NMR (75 MHz):  $\delta$  = 13.6, 21.8, 25.4, 33.7, 38.7, 68.2, 110.2, 122.5, 124.3, 124.6, 124.8, 125.06, 125.09, 127.3, 127.5, 127.8, 128.1, 129.0, 131.7, 132.3, 133.4, 141.5, 177.4, 202.9; HRMS ( $\text{EI}^+$ ): Calcd for  $\text{C}_{24}\text{H}_{23}\text{NO}_2$ ,  $\text{M}^+$  357.1729. Found  $m/z$  357.1726.

1 Tatsuno, Y.; Yoshida, T.; Otsuka, S. *Inorg. Synth.* **1979**, *19*, 220.

2 Kamijo, S.; Yamamoto, Y. *Angew. Chem. Int. Ed.* **2002**, *41*, 3230.

3 Li, H.; Yang, H.; Petersen, J. L.; Wang, K. K. *J. Org. Chem.* **2004**, *69*, 4500.

4 Miura, T.; Takahashi, Y.; Murakami, M. *Org. Lett.* **2007**, *9*, 5075.

5 Miura, T.; Takahashi, Y.; Murakami, M. *Org. Lett.* **2008**, *10*, 1743.

6 Miura, T.; Toyoshima, T.; Ito, Y.; Murakami, M. *Chem. Lett.* **2009**, *38*, 1174.

**4ac:** Purified by GPC (CHCl<sub>3</sub>): IR (KBr): 3310, 1717, 1684, 1472, 1389 cm<sup>-1</sup>; <sup>1</sup>H NMR (400 MHz): δ = 0.78 (t, *J* = 7.2 Hz, 3H), 1.07–1.22 (m, 2H), 1.39–1.57 (m, 2H), 2.18 (s, 3H), 2.18 (ddd, *J* = 17.6, 8.0, 6.4 Hz, 1H), 2.51 (ddd, *J* = 18.0, 8.4, 6.4 Hz, 1H), 3.40 (d, *J* = 13.2 Hz, 1H), 3.47 (d, *J* = 14.0 Hz, 1H), 6.69–6.76 (m, 3H), 6.82 (d, *J* = 8.0 Hz, 2H), 7.07 (td, *J* = 7.6, 0.8, 1H), 7.18–7.25 (m, 2H), 7.36 (br s, 1H); <sup>13</sup>C NMR (100 MHz): δ = 13.7, 20.9, 21.9, 25.4, 38.4, 38.9, 68.4, 110.1, 122.8, 124.5, 127.7, 128.4, 129.1, 129.7, 131.9, 136.0, 141.5, 177.0, 202.9; HRMS (EI<sup>+</sup>): Calcd for C<sub>21</sub>H<sub>23</sub>NO<sub>2</sub>, M<sup>+</sup> 321.1729. Found m/z 321.1727.

**4ad:** Purified by GPC (CHCl<sub>3</sub>): IR (KBr): 3240, 1717, 1678, 1472, 1340 cm<sup>-1</sup>; <sup>1</sup>H NMR (300 MHz): δ = 0.77 (t, *J* = 7.5 Hz, 3H), 1.06–1.20 (m, 2H), 1.36–1.57 (m, 2H), 2.09 (s, 3H), 2.17 (ddd, *J* = 17.7, 7.8, 6.6 Hz, 1H), 2.48 (ddd, *J* = 17.4, 7.8, 6.3 Hz, 1H), 3.39 (d, *J* = 13.2 Hz, 1H), 3.48 (d, *J* = 13.5 Hz, 1H), 6.60–6.68 (m, 2H), 6.74 (d, *J* = 8.1 Hz, 1H), 6.82–6.90 (m, 2H), 7.04–7.11 (m, 1H), 7.18–7.25 (m, 2H), 8.06 (br s, 1H); <sup>13</sup>C NMR (100 MHz): δ = 13.7, 21.1, 21.8, 25.4, 38.7, 38.8, 68.4, 110.1, 122.7, 124.5, 126.8, 127.3, 127.5, 127.6, 129.1, 130.7, 134.9, 137.1, 141.5, 177.1, 202.9; HRMS (EI<sup>+</sup>): Calcd for C<sub>21</sub>H<sub>23</sub>NO<sub>2</sub>, M<sup>+</sup> 321.1729. Found m/z 321.1730.

**4ae:** Purified by GPC (CHCl<sub>3</sub>): IR (KBr): 3250, 1717, 1678, 1472, 1339 cm<sup>-1</sup>; <sup>1</sup>H NMR (300 MHz): δ = 0.76 (t, *J* = 7.2 Hz, 3H), 1.06–1.10 (m, 2H), 1.39–1.57 (m, 2H), 2.08–2.22 (m, 1H), 2.13 (s, 3H), 2.38–2.49 (m, 1H), 3.51 (d, *J* = 14.1 Hz, 1H), 3.62 (d, *J* = 14.4 Hz, 1H), 6.77–6.85 (m, 3H), 6.92–6.97 (m, 2H), 6.99–7.10 (m, 2H), 7.24 (td, *J* = 7.2, 1.8 Hz, 1H), 8.73 (br s, 1H); <sup>13</sup>C NMR (75 MHz): δ = 13.7, 20.0, 21.9, 25.5, 34.5, 38.8, 68.0, 110.0, 122.7, 124.8, 125.2, 126.6, 127.8, 129.2, 129.8, 130.2, 133.8, 137.2, 141.5, 177.1, 202.9; HRMS (EI<sup>+</sup>): Calcd for C<sub>21</sub>H<sub>23</sub>NO<sub>2</sub>, M<sup>+</sup> 321.1729. Found m/z 321.1729.

**4af:** Purified by GPC (CHCl<sub>3</sub>): IR (KBr): 3247, 1711, 1676, 1514, 1472, 1250 cm<sup>-1</sup>; <sup>1</sup>H NMR (300 MHz): δ = 0.78 (t, *J* = 7.2 Hz, 3H), 1.08–1.22 (m, 2H), 1.41–1.56 (m, 2H), 2.18 (ddd, *J* = 17.7, 8.1, 6.9 Hz, 1H), 2.51 (ddd, *J* = 17.7, 7.8, 6.3 Hz, 1H), 3.38 (d, *J* = 13.5 Hz, 1H), 3.45 (d, *J* = 13.2 Hz, 1H), 3.67 (s, 3H), 6.52–6.58 (m, 2H), 6.70 (d, *J* = 7.8 Hz, 1H), 6.73–6.79 (m, 2H), 7.07 (td, *J* = 7.8, 1.2 Hz, 1H), 7.17–7.22 (m, 2H), 7.35 (br s, 1H); <sup>13</sup>C NMR (100 MHz): δ = 13.7, 21.8, 25.3, 38.0, 38.9, 54.9, 68.5, 110.1, 113.0, 122.8, 124.5, 126.9, 127.7, 129.1, 130.8, 141.5, 158.2, 177.1, 203.0; HRMS (EI<sup>+</sup>): Calcd for C<sub>21</sub>H<sub>23</sub>NO<sub>3</sub>, M<sup>+</sup> 337.1678. Found m/z 337.1682.

**4ag:** Purified by GPC (CHCl<sub>3</sub>): IR (KBr): 3380, 3200, 1719, 1682, 1522, 1347 cm<sup>-1</sup>; <sup>1</sup>H NMR (300 MHz): δ = 0.77 (t, *J* = 7.2 Hz, 3H), 1.04–1.23 (m, 2H), 1.39–1.57 (m, 2H), 2.09–2.22 (m, 1H), 2.46 (ddd, *J* = 17.7, 7.5, 6.3 Hz, 1H), 3.54 (d, *J* = 13.5 Hz, 1H), 3.59 (d, *J* = 13.5 Hz, 1H), 6.75 (d, *J* = 8.4 Hz, 1H), 7.00–7.06 (m, 2H), 7.11 (td, *J* = 7.5, 1.2 Hz, 1H), 7.21–7.29 (m, 2H), 7.73 (br s, 1H), 7.85–7.91 (m, 2H); <sup>13</sup>C NMR (75 MHz): δ = 13.7, 21.9, 25.4, 38.4, 38.8, 67.8, 110.2, 122.9, 123.3, 124.4, 126.6, 129.7, 130.8, 141.0, 143.1, 146.9, 175.4, 201.9; HRMS (EI<sup>+</sup>): Calcd for C<sub>20</sub>H<sub>20</sub>N<sub>2</sub>O<sub>4</sub>, M<sup>+</sup> 352.1423. Found m/z 352.1426.

**4ah:** Purified by flash column chromatography (CH<sub>2</sub>Cl<sub>2</sub>/acetone = 1/1): IR (KBr): 1723, 1707, 1617, 1472, 1327 cm<sup>-1</sup>; <sup>1</sup>H NMR (400 MHz): δ = 0.77 (t, *J* = 7.6 Hz, 3H), 1.06–1.22 (m, 2H), 1.38–1.57 (m, 2H), 2.12–2.23 (m, 1H), 2.48 (ddd, *J* = 17.6, 7.6, 6.4 Hz, 1H), 3.45 (d, *J* = 14.0 Hz, 1H), 3.50 (d, *J* = 13.6 Hz, 1H), 6.72 (d, *J* = 7.2 Hz, 1H), 6.96 (dd, *J* = 7.6, 4.8 Hz, 1H), 7.08 (t, *J* = 7.6 Hz, 1H), 7.18–7.25 (m, 3H), 8.11 (s, 1H), 8.29 (d, *J* = 4.0 Hz, 1H), 8.42 (br s, 1H); <sup>13</sup>C NMR (100 MHz): δ = 13.7, 21.9, 25.4, 35.9, 38.8, 67.9, 110.3, 122.7, 123.0, 124.3, 126.8, 129.5, 131.0, 137.5, 141.7, 147.7, 150.5, 176.2, 202.5; HRMS (EI<sup>+</sup>): Calcd for C<sub>19</sub>H<sub>20</sub>N<sub>2</sub>O<sub>2</sub>, M<sup>+</sup> 308.1525. Found m/z 308.1526.

**4bd:** Purified by GPC (CHCl<sub>3</sub>): IR (KBr): 3279, 1724, 1689, 1670, 1617, 1469 cm<sup>-1</sup>; <sup>1</sup>H NMR (400 MHz): δ = 2.11 (s, 3H), 3.55 (d, *J* = 13.2 Hz, 1H), 3.63 (d, *J* = 13.2 Hz, 1H), 6.58–6.62 (m, 2H), 6.71 (d, *J* = 8.0 Hz, 1H), 6.86–6.93 (m, 2H), 7.06 (td, *J* = 7.6, 0.8 Hz, 1H), 7.19–7.28 (m, 4H), 7.36–7.44 (m, 2H), 7.48–7.53 (m, 2H); <sup>13</sup>C NMR (100 MHz): δ = 21.1, 41.5, 66.3, 110.3, 123.0, 124.4, 127.1, 127.38, 127.40, 128.0, 128.4, 129.2, 129.3, 130.9, 132.7, 134.3, 136.5, 137.0, 140.9, 177.0, 194.7; HRMS (EI<sup>+</sup>): Calcd for C<sub>23</sub>H<sub>19</sub>NO<sub>2</sub>, M<sup>+</sup> 341.1416. Found m/z 341.1409.

[α]<sub>D</sub><sup>26.8</sup> = +64.9 (c = 1.01, CHCl<sub>3</sub>, 38% ee); HPLC (Daicel Chiralcel OD-H, hexane/*i*-PrOH = 90:10, flow rate = 0.6 mL/min, λ = 254 nm): *t*<sub>1</sub> = 13.0 min (major), *t*<sub>2</sub> = 15.9 min (minor).

**4bf:** Purified by GPC (CHCl<sub>3</sub>): IR (KBr): 3150, 1707, 1678, 1512, 1472, 1248 cm<sup>-1</sup>; <sup>1</sup>H NMR (400 MHz):  $\delta$  = 3.54 (d,  $J$  = 13.2 Hz, 1H), 3.61 (d,  $J$  = 13.6 Hz, 1H), 3.66 (s, 3H), 6.52–6.57 (m, 2H), 6.69–6.74 (m, 3H), 7.05 (td,  $J$  = 8.0, 1.2 Hz, 1H), 7.19–7.25 (m, 4H), 7.38–7.43 (m, 1H), 7.48–7.51 (m, 2H), 7.71 (br s, 1H); <sup>13</sup>C NMR (100 MHz):  $\delta$  = 40.8, 54.9, 66.4, 110.5, 113.0, 123.0, 124.2, 126.3, 127.9, 128.4, 129.1, 129.3, 131.1, 132.7, 136.4, 140.9, 158.3, 177.4, 194.8; HRMS (EI<sup>+</sup>): Calcd for C<sub>23</sub>H<sub>19</sub>NO<sub>3</sub>, M<sup>+</sup> 357.1365. Found m/z 357.1369.

**4ca:** Purified by reprecipitation from CH<sub>2</sub>Cl<sub>2</sub>/hexane: IR (KBr): 3119, 1706, 1668, 1614, 1471, 1237 cm<sup>-1</sup>; <sup>1</sup>H NMR (400 MHz):  $\delta$  = 3.59 (d,  $J$  = 13.2 Hz, 1H), 3.64 (d,  $J$  = 13.2 Hz, 1H), 6.72 (d,  $J$  = 7.6 Hz, 1H), 6.83 (d,  $J$  = 7.2 Hz, 2H), 7.02 (t,  $J$  = 7.2 Hz, 2H), 7.04–7.11 (m, 2H), 7.14 (dd,  $J$  = 4.8, 2.4 Hz, 1H), 7.22 (d,  $J$  = 7.6 Hz, 2H), 7.31 (dd,  $J$  = 5.2, 1.2 Hz, 1H), 7.53 (br s, 1H), 7.57 (dd,  $J$  = 2.4, 0.8 Hz, 1H); <sup>13</sup>C NMR (100 MHz):  $\delta$  = 40.9, 66.5, 110.0, 123.2, 124.8, 125.8, 126.7, 127.6, 127.7, 129.3, 129.4, 130.2, 132.2, 134.5, 139.5, 140.9, 176.0, 187.5; HRMS (EI<sup>+</sup>): Calcd for C<sub>20</sub>H<sub>15</sub>NO<sub>2</sub>S, M<sup>+</sup> 333.0823. Found m/z 333.0825.

**Typical procedure for Pd(0)-Catalyzed Cyclization/[1,3] Rearrangement Reaction of 1a with Allyl Alcohol (5a) (Table 3, entry 1).** To an oven-dried flask equipped with a stirrer bar was added CpPd( $\pi$ -allyl) (2.1 mg, 10  $\mu$ mol, 5 mol % Pd) and dppf (5.5 mg, 10  $\mu$ mol, 5 mol %). The flask was sealed with a rubber septum, evacuated and refilled with argon three times. Then, a solution of allyl alcohol (**5a**, 136  $\mu$ L, 2.0 mmol, 10 equiv) and substrate **1a** (39.8 mg, 0.20 mmol, 1.0 equiv) in dry toluene (2.0 mL) was added *via* syringe. After being heated at 40 °C for 10 min, the reaction mixture was cooled to room temperature. The resulting mixture was passed through a pad of Florisil<sup>®</sup> and eluted with ethyl acetate. The filtrate was concentrated under reduced pressure. The residue was purified by gel permeation chromatography (GPC, CHCl<sub>3</sub>) to give product **6aa** (30.2 mg, 0.117 mmol, 59%).

**6aa:** Purified by GPC (CHCl<sub>3</sub>): IR (KBr): 3280, 1717, 1698, 1663, 1472, 1399 cm<sup>-1</sup>; <sup>1</sup>H NMR (400 MHz):  $\delta$  = 0.76 (t,  $J$  = 7.2 Hz, 3H), 1.06–1.21 (m, 2H), 1.36–1.54 (m, 2H), 2.19 (ddd,  $J$  = 17.6, 8.0, 6.8 Hz, 1H), 2.47 (ddd,  $J$  = 17.6, 8.0, 6.4 Hz, 1H), 2.87 (dd,  $J$  = 14.0, 8.0 Hz, 1H), 2.98 (dd,  $J$  = 14.0, 6.8 Hz, 1H), 4.88–4.94 (m, 1H), 5.00–5.07 (m, 1H), 5.30–5.42 (m, 1H), 6.93 (d,  $J$  = 8.0 Hz, 1H), 7.07 (td,  $J$  = 7.6, 1.2 Hz, 1H), 7.14 (d,  $J$  = 7.6 Hz, 1H), 7.28 (td,  $J$  = 7.6, 1.2 Hz, 1H), 8.05 (br s, 1H); <sup>13</sup>C NMR (75 MHz):  $\delta$  = 13.7, 21.9, 25.4, 37.5, 38.7, 66.9, 110.2, 119.4, 123.1, 124.2, 127.7, 129.1, 131.4, 141.5, 177.2, 202.6; HRMS (EI<sup>+</sup>): Calcd for C<sub>16</sub>H<sub>19</sub>NO<sub>2</sub>, M<sup>+</sup> 257.1416. Found m/z 257.1416.

**6ab:** Purified by GPC (CHCl<sub>3</sub>): IR (KBr): 3210, 1717, 1674, 1619, 1472 cm<sup>-1</sup>; <sup>1</sup>H NMR (400 MHz):  $\delta$  = 0.75 (t,  $J$  = 7.2 Hz, 3H), 1.03–1.21 (m, 2H), 1.34 (s, 3H), 1.35–1.53 (m, 2H), 2.17 (ddd,  $J$  = 17.6, 8.0, 6.8 Hz, 1H), 2.46 (ddd,  $J$  = 17.6, 8.0, 6.0 Hz, 1H), 2.95 (d,  $J$  = 14.4 Hz, 1H), 3.00 (d,  $J$  = 14.0 Hz, 1H), 4.56–4.61 (m, 2H), 6.96 (d,  $J$  = 8.0 Hz, 1H), 7.06 (td,  $J$  = 7.6, 0.8 Hz, 1H), 7.11–7.16 (m, 1H), 7.28 (td,  $J$  = 7.6, 1.6 Hz, 1H), 8.88 (br s, 1H); <sup>13</sup>C NMR (75 MHz):  $\delta$  = 13.7, 21.9, 23.7, 25.4, 38.3, 40.2, 67.2, 110.3, 115.0, 122.9, 124.5, 128.0, 129.1, 140.1, 141.6, 177.8, 202.5; HRMS (EI<sup>+</sup>): Calcd for C<sub>17</sub>H<sub>21</sub>NO<sub>2</sub>, M<sup>+</sup> 271.1572. Found m/z 271.1577.

**6ac:** Purified by GPC (CHCl<sub>3</sub>): IR (KBr): 3210, 1717, 1676, 1472, 1339 cm<sup>-1</sup>; <sup>1</sup>H NMR (300 MHz):  $\delta$  = 0.76 (t,  $J$  = 7.2 Hz, 3H), 1.05–1.20 (m, 2H), 1.34–1.56 (m, 2H), 2.11–2.25 (m, 1H), 2.45 (ddd,  $J$  = 17.7, 8.1, 6.3 Hz, 1H), 2.92–3.03 (m, 1H), 3.14 (ddd,  $J$  = 13.5, 6.3, 1.2 Hz, 1H), 5.70–5.82 (m, 1H), 6.36 (d,  $J$  = 15.6 Hz, 1H), 6.92 (d,  $J$  = 7.5 Hz, 1H), 7.05–7.23 (m, 7H), 7.28 (td,  $J$  = 7.8, 1.2 Hz, 1H), 8.32 (br s, 1H); <sup>13</sup>C NMR (75 MHz):  $\delta$  = 13.7, 21.9, 25.4, 36.8, 38.7, 66.9, 110.2, 122.9, 123.1, 124.3, 126.1, 127.2, 127.7, 128.3, 129.2, 134.3, 136.9, 141.3, 176.9, 202.6; HRMS (EI<sup>+</sup>): Calcd for C<sub>22</sub>H<sub>23</sub>NO<sub>2</sub>, M<sup>+</sup> 333.1729. Found m/z 333.1728.

**6ad:** Purified by GPC (CHCl<sub>3</sub>): IR (KBr): 3263, 1717, 1692, 1474 cm<sup>-1</sup>; <sup>1</sup>H NMR (400 MHz):  $\delta$  = 0.76 (t,  $J$  = 7.2 Hz, 3H), 1.04–1.22 (m, 2H), 1.36–1.55 (m, 2H), 1.50 (s, 3H), 1.51 (s, 3H), 2.20 (ddd,  $J$  = 17.6, 7.6, 6.4 Hz, 1H), 2.47 (ddd,  $J$  = 18.0, 8.0, 6.4 Hz, 1H), 2.84–2.90 (m, 1H), 2.90–2.96 (m, 1H), 4.67–4.74 (m, 1H), 6.94 (d,  $J$  = 8.0 Hz, 1H), 7.05 (td,  $J$  = 7.6, 1.2 Hz, 1H), 7.11–7.17 (m, 1H), 7.27 (td,  $J$  = 7.6, 1.2 Hz, 1H), 8.63 (br s, 1H); <sup>13</sup>C NMR (75 MHz):  $\delta$  = 13.7, 18.0, 21.9, 25.4, 25.8, 32.0, 38.7, 67.0, 110.1, 116.6, 122.9, 124.1, 128.2, 128.9, 135.9, 141.5, 177.8, 203.1; HRMS (EI<sup>+</sup>): Calcd for C<sub>18</sub>H<sub>23</sub>NO<sub>2</sub>, M<sup>+</sup> 285.1729. Found m/z 285.1732.

**6bd:** Purified by GPC (CHCl<sub>3</sub>): IR (KBr): 3276, 1723, 1686, 1667, 1468, 1233 cm<sup>-1</sup>; <sup>1</sup>H NMR (400 MHz): δ = 1.46 (s, 3H), 1.52 (s, 3H), 3.00 (dd, *J* = 14.0, 8.4 Hz, 1H), 3.09 (dd, *J* = 14.0, 6.8 Hz, 1H), 4.78–4.85 (m, 1H), 6.94 (d, *J* = 7.6 Hz, 1H), 6.99 (t, *J* = 7.2 Hz, 1H), 7.09 (d, *J* = 6.8 Hz, 1H), 7.20–7.30 (m, 3H), 7.39 (t, *J* = 7.2 Hz, 1H), 7.47–7.52 (m, 2H), 8.99 (br s, 1H); <sup>13</sup>C NMR (100 MHz): δ = 17.9, 25.9, 34.6, 65.1, 110.6, 116.3, 123.0, 124.0, 128.0, 128.1, 128.4, 129.0, 129.9, 132.7, 136.5, 141.0, 178.4, 194.8; HRMS (EI<sup>+</sup>): Calcd for C<sub>20</sub>H<sub>19</sub>NO<sub>2</sub>, M<sup>+</sup> 305.1416. Found m/z 305.1415.

**6ae:** Purified by GPC (CHCl<sub>3</sub>): IR (KBr): 3290, 1717, 1655, 1472 cm<sup>-1</sup>; <sup>1</sup>H NMR (300 MHz): δ = 0.67 (t, *J* = 7.5 Hz, 3H), 0.76 (t, *J* = 6.9 Hz, 3H), 1.06–1.21 (m, 4H), 1.24–1.57 (m, 2H), 1.70–1.80 (m, 2H), 2.20 (ddd, *J* = 18.0, 7.8, 6.9 Hz, 1H), 2.47 (ddd, *J* = 17.7, 7.5, 6.9 Hz, 1H), 2.80 (dd, *J* = 13.8, 7.8 Hz, 1H), 2.92 (dd, *J* = 13.8, 6.9 Hz, 1H), 4.80–5.02 (m, 1H), 5.40 (dt, *J* = 15.0, 6.9 Hz, 1H), 6.92–6.97 (m, 1H), 7.06 (td, *J* = 7.8, 0.9 Hz, 1H), 7.12–7.17 (m, 1H), 7.27 (td, *J* = 7.5, 1.2 Hz, 1H), 8.67 (br s, 1H); <sup>13</sup>C NMR (100 MHz): δ = 13.3, 13.7, 21.9, 22.3, 25.4, 34.4, 36.5, 38.7, 67.2, 110.1, 122.5, 122.9, 124.3, 128.1, 128.9, 135.7, 141.5, 177.6, 203.0; HRMS (EI<sup>+</sup>): Calcd for C<sub>19</sub>H<sub>25</sub>NO<sub>2</sub>, M<sup>+</sup> 299.1885. Found m/z 299.1883.

**6af:** Purified by GPC (CHCl<sub>3</sub>): IR (KBr): 3300, 1717, 1698, 1670, 1472, 1339 cm<sup>-1</sup>; <sup>1</sup>H NMR (300 MHz): δ = 0.73 (t, *J* = 7.2 Hz, 1H), 0.76 (t, *J* = 7.2 Hz, 1H), 1.04–1.23 (m, 2H), 1.34–1.56 (m, 2H), 1.68–1.74 (m, 2H), 2.20 (ddd, *J* = 17.7, 7.5, 6.6 Hz, 1H), 2.46 (ddd, *J* = 17.7, 7.8, 6.6 Hz, 1H), 2.78 (dd, *J* = 13.5, 7.8 Hz, 1H), 2.92 (dd, *J* = 13.8, 6.9 Hz, 1H), 4.89–5.09 (m, 1H), 5.38–5.50 (m, 1H), 6.92–6.98 (m, 1H), 7.02–7.09 (m, 1H), 7.10–7.17 (m, 1H), 7.27 (td, *J* = 7.8, 1.5 Hz, 1H), 8.82 (br s, 1H); <sup>13</sup>C NMR: δ = 13.7, 21.9, 25.3, 25.4, 36.5, 38.8, 67.2, 110.0, 121.3, 122.9, 124.3, 128.1, 128.9, 137.5, 141.5, 177.4, 203.0; HRMS (EI<sup>+</sup>): Calcd for C<sub>18</sub>H<sub>23</sub>NO<sub>2</sub>, M<sup>+</sup> 285.1729. Found m/z 285.1728.

**Typical procedure for Pd(0)-Catalyzed Cyclization/[1,3] Rearrangement/Allylation Reaction of 1a with Allyl Alcohol (5a) (Table 4).** To an oven-dried flask equipped with a stirrer bar was added CpPd(π-allyl) (2.1 mg, 10 μmol, 5 mol % Pd) and dppf (5.5 mg, 10 μmol, 5 mol %). The flask was sealed with a rubber septum, evacuated and refilled with argon three times. Then, a solution of allyl alcohol (**5a**, 272 μL, 4.0 mmol, 20 equiv) and substrate **1a** (39.8 mg, 0.20 mmol, 1.0 equiv) in dry toluene (2.0 mL) was added *via* syringe. After being heated at 40 °C for 12 h, the reaction mixture was cooled to room temperature. The resulting mixture was passed through a pad of Florisil<sup>®</sup> and eluted with ethyl acetate. The filtrate was concentrated under reduced pressure. The residue was purified by gel permeation chromatography (GPC, CHCl<sub>3</sub>) to give product **7aa** (42.2 mg, 0.142 mmol, 71%).

**7aa:** Purified by GPC (CHCl<sub>3</sub>): IR (neat): 1725, 1609, 1487, 1466, 1356 cm<sup>-1</sup>; <sup>1</sup>H NMR (300 MHz): δ = 0.75 (t, *J* = 7.5 Hz, 3H), 1.02–1.22 (m, 2H), 1.32–1.53 (m, 2H), 2.09 (ddd, *J* = 17.7, 7.2, 6.9 Hz, 1H), 2.40 (ddd, *J* = 17.7, 7.8, 6.3 Hz, 1H), 2.82–2.92 (m, 1H), 2.94–3.03 (m, 1H), 4.30–4.48 (m, 2H), 4.84–4.92 (m, 1H), 4.96–5.04 (m, 1H), 5.20–5.37 (m, 3H), 5.75–5.89 (m, 1H), 6.87 (d, *J* = 7.8 Hz, 1H), 7.07 (td, *J* = 7.5, 1.2 Hz, 1H), 7.14–7.18 (m, 1H), 7.30 (td, *J* = 7.8, 1.2 Hz, 1H); <sup>13</sup>C NMR (100 MHz): δ = 13.6, 21.9, 25.3, 37.5, 38.6, 42.5, 66.1, 109.3, 117.9, 119.4, 123.0, 123.9, 127.0, 128.9, 131.0, 131.5, 143.4, 174.3, 202.8; HRMS (EI<sup>+</sup>): Calcd for C<sub>19</sub>H<sub>23</sub>NO<sub>2</sub>, M<sup>+</sup> 297.1729. Found m/z 297.1729.

**7ab:** Purified by GPC (CHCl<sub>3</sub>): IR (neat): 1728, 1609, 1487, 1466, 1354 cm<sup>-1</sup>; <sup>1</sup>H NMR (400 MHz): δ = 0.75 (t, *J* = 7.2 Hz, 3H), 1.03–1.21 (m, 2H), 1.30–1.33 (m, 3H), 1.35–1.52 (m, 2H), 1.74–1.77 (m, 3H), 2.08 (ddd, *J* = 17.6, 8.0, 6.4 Hz, 1H), 2.43 (ddd, *J* = 17.6, 8.0, 6.0 Hz, 1H), 2.97 (s, 2H), 4.24 (d, *J* = 16.4 Hz, 1H), 4.34 (d, *J* = 16.0 Hz, 1H), 4.53–4.57 (m, 1H), 4.57–4.61 (m, 1H), 4.88–4.93 (m, 1H), 4.93–4.97 (m, 1H), 6.88 (d, *J* = 8.0 Hz, 1H), 7.06 (td, *J* = 7.6, 0.8 Hz, 1H), 7.15–7.19 (m, 1H), 7.28 (td, *J* = 8.0, 1.6 Hz, 1H); <sup>13</sup>C NMR (100 MHz): δ = 13.6, 20.0, 21.8, 24.0, 25.3, 38.4, 40.2, 46.2, 66.4, 109.5, 112.8, 115.3, 122.7, 124.2, 127.3, 129.0, 138.9, 140.0, 143.9, 174.7, 202.8; HRMS (EI<sup>+</sup>): Calcd for C<sub>21</sub>H<sub>27</sub>NO<sub>2</sub>, M<sup>+</sup> 325.2042. Found m/z 325.2043.

**7ac**: Purified by PTLC (hexane/ethyl acetate = 10:1): IR (neat): 1715, 1609, 1485, 1466, 1354  $\text{cm}^{-1}$ ;  $^1\text{H}$  NMR (300 MHz):  $\delta$  = 0.77 (t,  $J$  = 7.2 Hz, 3H), 1.07–1.22 (m, 2H), 1.38–1.56 (m, 2H), 2.14 (ddd,  $J$  = 17.7, 8.1, 7.2 Hz, 1H), 2.45 (ddd,  $J$  = 17.7, 7.8, 6.3 Hz, 1H), 3.04 (ddd,  $J$  = 13.8, 8.7, 0.9 Hz, 1H), 3.18 (ddd,  $J$  = 13.8, 6.3, 1.5 Hz, 1H), 4.34 (ddd,  $J$  = 15.9, 7.2, 1.5 Hz, 1H), 4.72 (ddd,  $J$  = 16.2, 5.4, 1.8 Hz, 1H), 5.69 (ddd,  $J$  = 15.3, 8.4, 6.3 Hz, 1H), 5.95 (ddd,  $J$  = 12.0, 6.9, 5.1 Hz, 1H), 6.38 (d,  $J$  = 15.9 Hz, 1H), 6.56 (d,  $J$  = 15.9 Hz, 1H), 6.91 (d,  $J$  = 7.5 Hz, 1H), 7.00–7.32 (m, 13H);  $^{13}\text{C}$  NMR (75 MHz):  $\delta$  = 13.7, 21.9, 25.3, 36.8, 38.7, 42.2, 66.4, 109.4, 122.3, 122.8, 123.0, 123.9, 126.0, 126.3, 127.0, 127.2, 127.7, 128.40, 128.45, 129.1, 133.5, 134.3, 135.7, 136.8, 143.3, 174.3, 202.8; HRMS ( $\text{EI}^+$ ): Calcd for  $\text{C}_{31}\text{H}_{31}\text{NO}_2$ ,  $M^+$  449.2355. Found  $m/z$  449.2360.

### **Cross-over Experiment on the Reaction with 3aa and 3dc.**

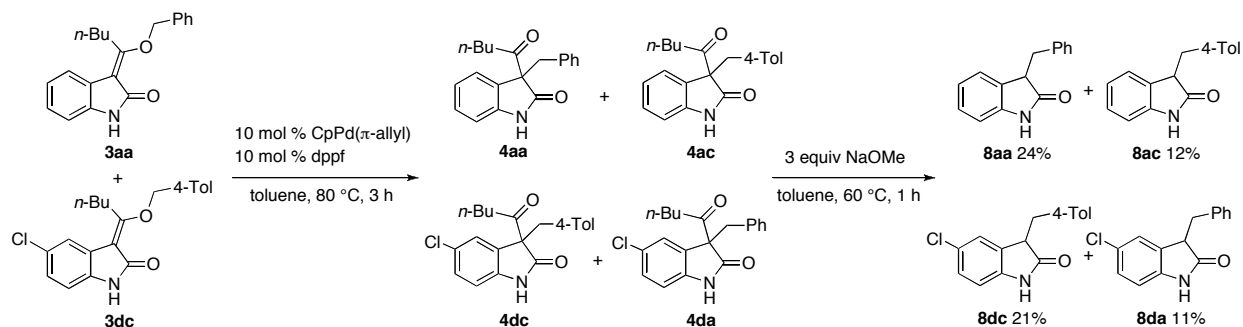

To an oven-dried flask equipped with a stirrer bar was added  $\text{CpPd}(\pi\text{-allyl})$  (2.1 mg, 10  $\mu\text{mol}$ , 10 mol % Pd), dppf (5.5 mg, 10  $\mu\text{mol}$ , 10 mol %), **3aa** (30.7 mg, 0.10 mmol, 1.0 equiv), and **3dc** (35.6 mg, 0.10 mmol, 1.0 equiv). The flask was sealed with a rubber septum, evacuated and refilled with argon three times. Then, dry toluene (4.0 mL) was added *via* syringe. After being heated at 80 °C for 3 h, the reaction mixture was cooled to room temperature. The resulting mixture was passed through a pad of Florisil<sup>®</sup> and eluted with ethyl acetate. The filtrate was concentrated under reduced pressure to give a crude mixture of **4aa**, **4ac**, **4da** and **4dc**.

Without further purification, the mixture was treated with sodium methoxide (32.4 mg, 0.60 mmol, 6.0 equiv) in dry toluene (4.0 mL). After being stirred at 60 °C for 1 h, the reaction mixture was cooled to room temperature. The resulting mixture was quenched with addition of water. The aqueous layer was extracted with  $\text{Et}_2\text{O}$ . The combined organic extracts were dried over  $\text{MgSO}_4$  and concentrated under reduced pressure to give hydrolytic products **8aa**, **8ac**, **8da** and **8dc**. The yield was determined by GC analysis using *n*-nonadecane as an internal standard (GC conditions: Agilent Technologies DB-1, 15 m  $\times$  0.32 mm, Injection 250 °C; detector temperature 290 °C; oven temperature: 80 °C for 5 min, increase by 20 °C/min to 280 °C, and keep the temperature for 5 min,  $R_t$  **8aa** 12.5 min, **8ac** 13.0 min, **8da** 13.5 min, **8dc** 14.0 min).

STANDARD IN OBSERVE

Pulse Sequence: s2pul

Solvent: CDCl3

Ambient temperature

QEXIN-300BB "varian2"

Relax. delay 1.502 sec

Pulse 45.0 degrees

Acq. time 3.200 sec

Width 5000.0 Hz

16 repetitions

OBSERVE H1, 300.0672337 MHz

DATA PROCESSING

FT size 32768

Total time 1 min, 24 sec

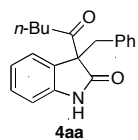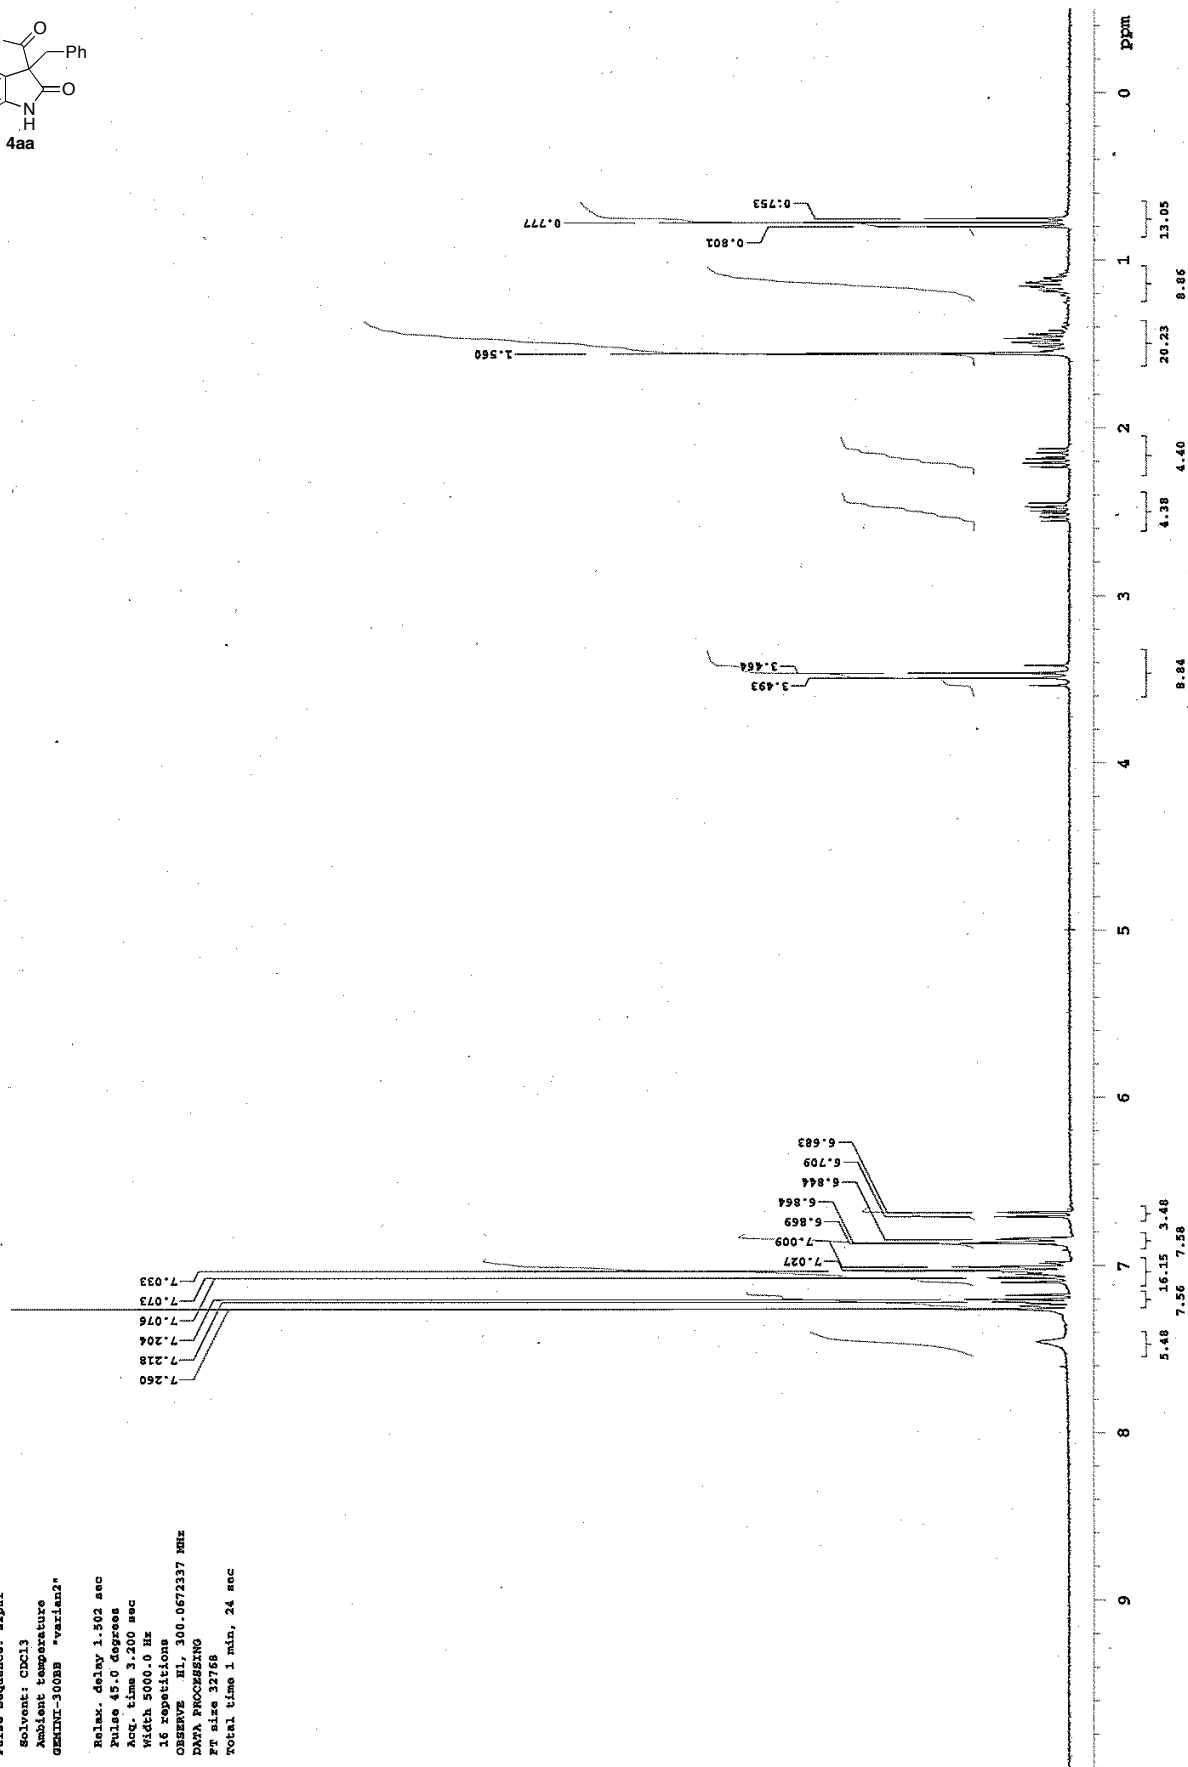

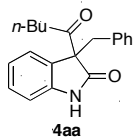

13C OBSERVE

Pulse Sequence: s2pul

Solvent: CDCl<sub>3</sub>

Ambient temperature

QNP1H-300B \*varian2\*

Relax. delay 1.158 sec

Pulse 45.0 degrees

Acq. time 0.842 sec

Width 19000.0 Hz

15904 repetitions

OBSERVE C13, 75.4519686 MHz

DECOUPLE H1, 300.0687335 MHz

Power 37 dB

continuously on

WALTZ-16 modulated

DATA PROCESSING

Line broadening 1.0 Hz

FT size 32768

Total time 39 hr, 24 min, 35 sec

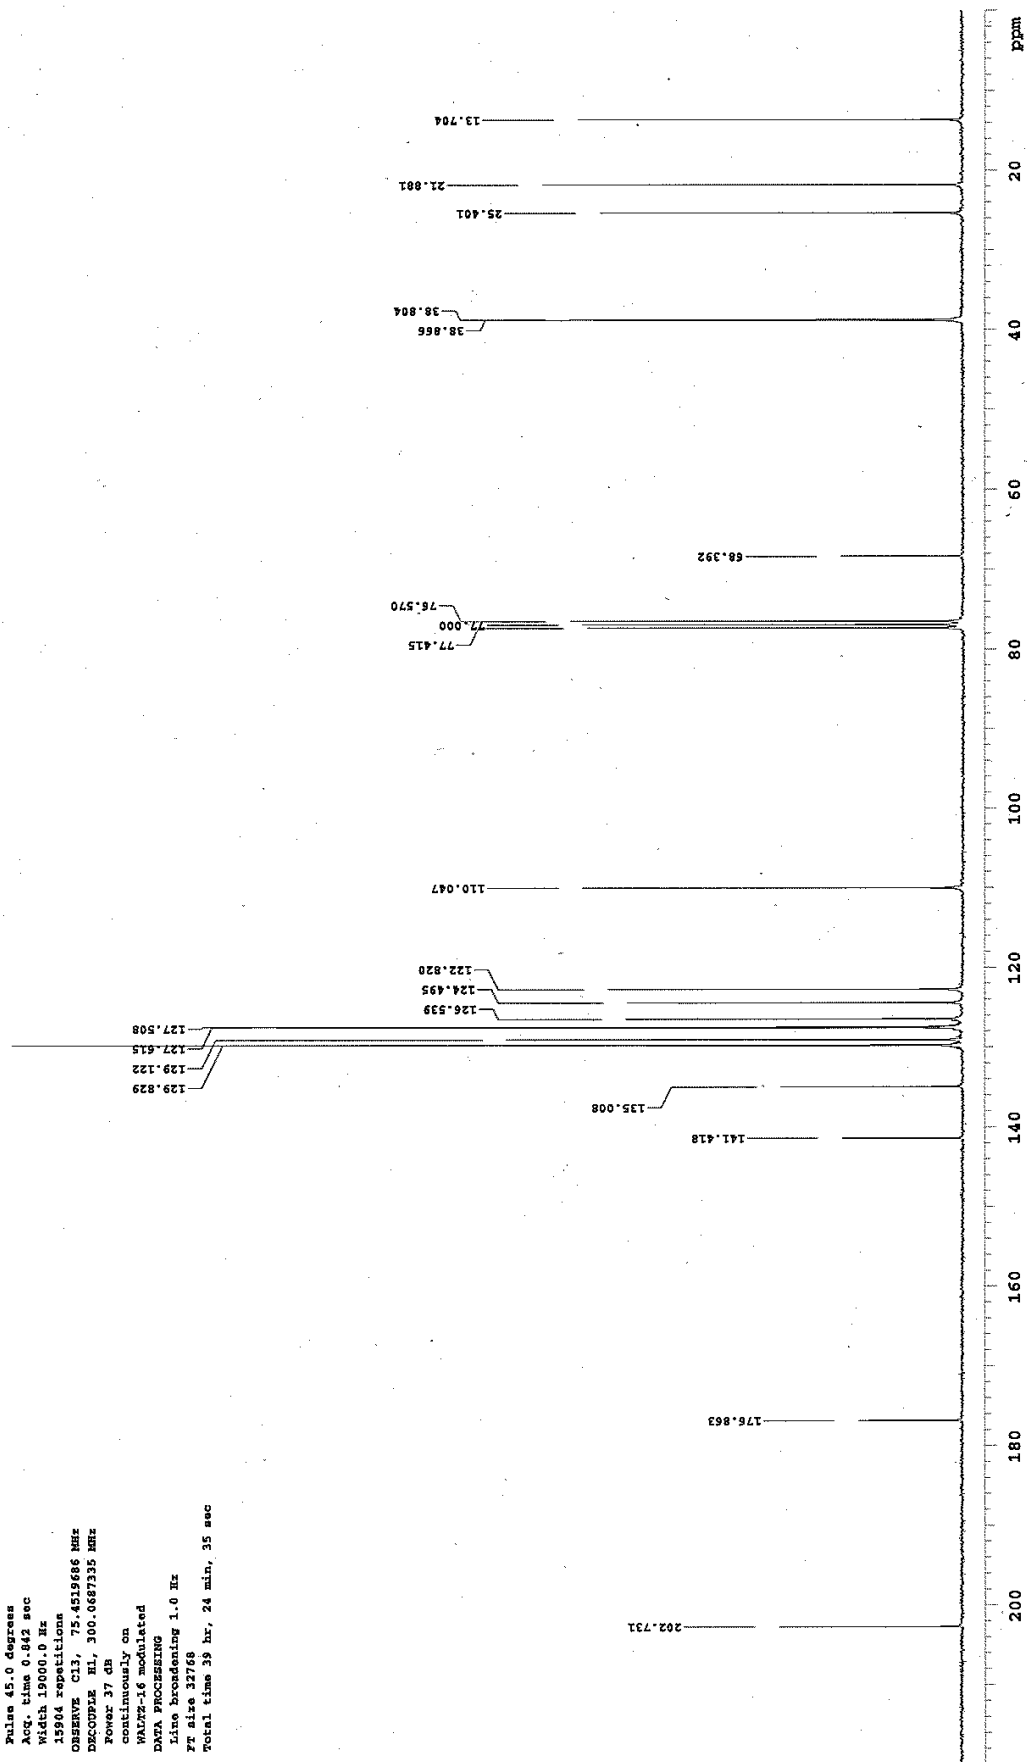





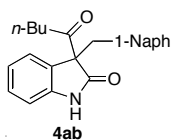

Pulse sequence: zgpg30  
 Solvent: CHCl<sub>3</sub>  
 Ambient temperature  
 File: VM-nbu\_1-hp  
 GEMINI-300BH "variant2"  
 Relax. delay 1.158 sec  
 Pulse 45.0 degrees  
 Acq. time 0.842 sec  
 Width 19000.0 Hz  
 1264 repetitions  
 OBSERVE C13, 75.4519756 MHz  
 DECOUPLE H1, 300.0877333 MHz  
 Power 37 dB  
 continuously on  
 WALTZ-16 modulated  
 DATA PROCESSING  
 F1 size 32768  
 Total time 60 hr, 8 min, 7 sec

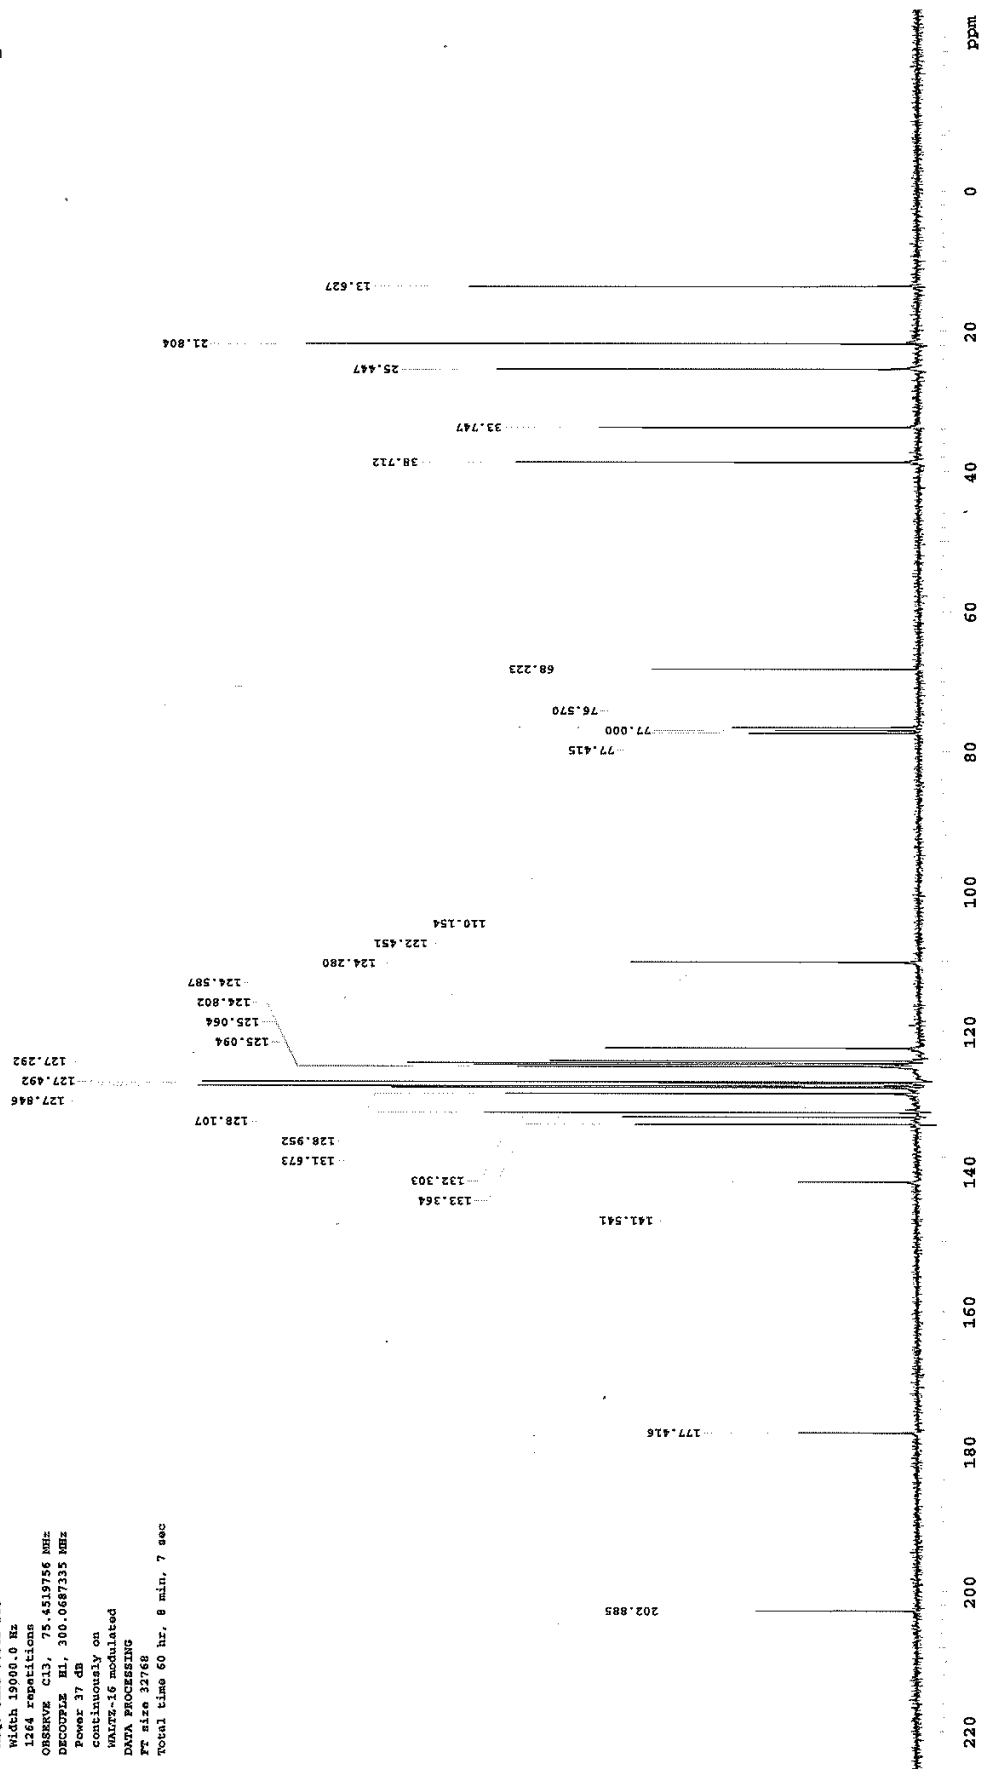

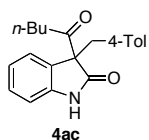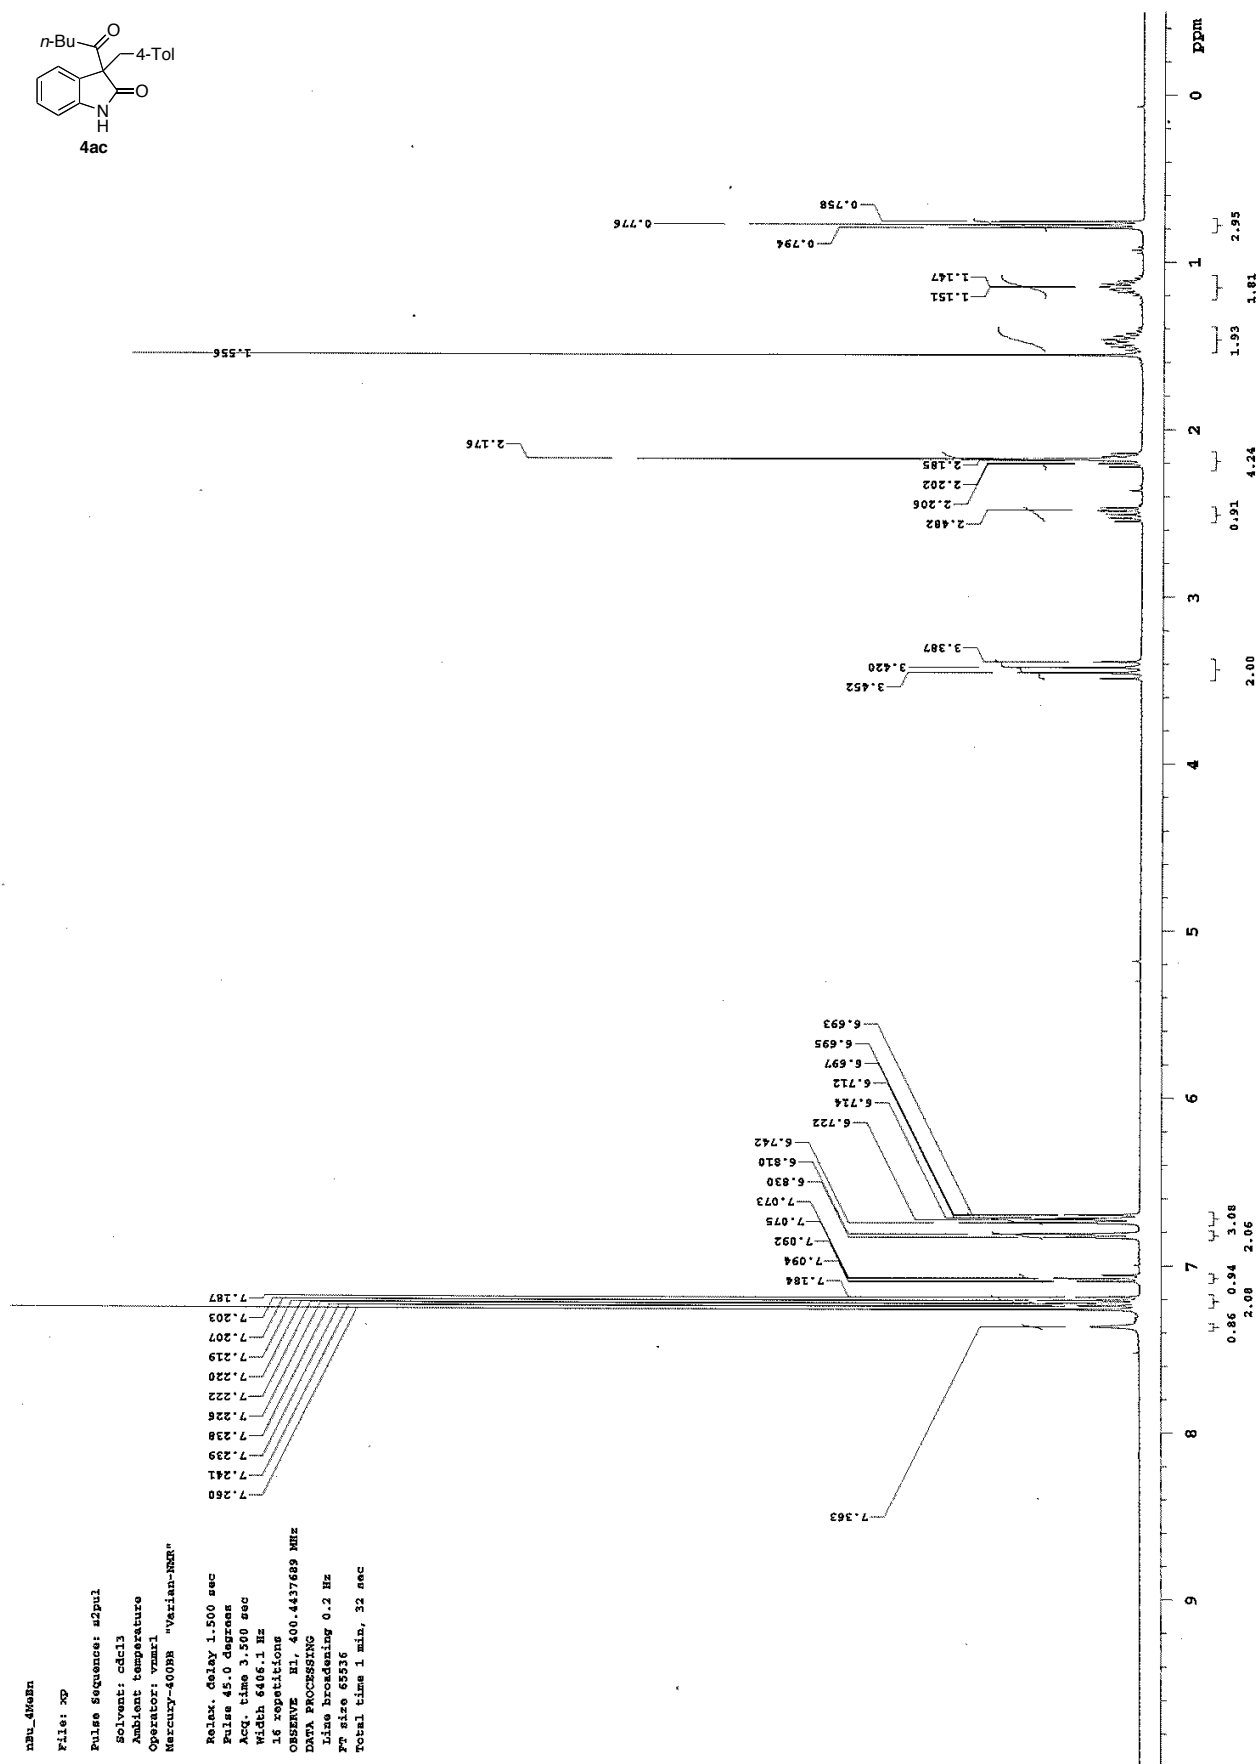

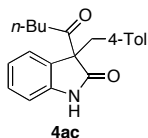

Pulse Sequence: s2pul  
 Solvent: cdcl3  
 Ambient temperature  
 Operator: vmarl  
 File: Oxindole\_nBu\_4Mebn\_13C  
 Mercury-400MR "Varian-NMR"  
 Relax. delay 0.700 sec  
 Pulse 45.0 degrees  
 Acq. time 1.300 sec  
 Width 24154.6 Hz  
 752 repetitions  
 OBSERVE C13, 100.6316694 MHz  
 DECOUPLE H1, 400.4438059 MHz  
 Power 40 dB  
 continuously on  
 WALTZ-16 modulated  
 DATA PROCESSING  
 Line broadening 1.0 Hz  
 FT size 65536  
 Total time 5 hr, 48 min, 45 sec

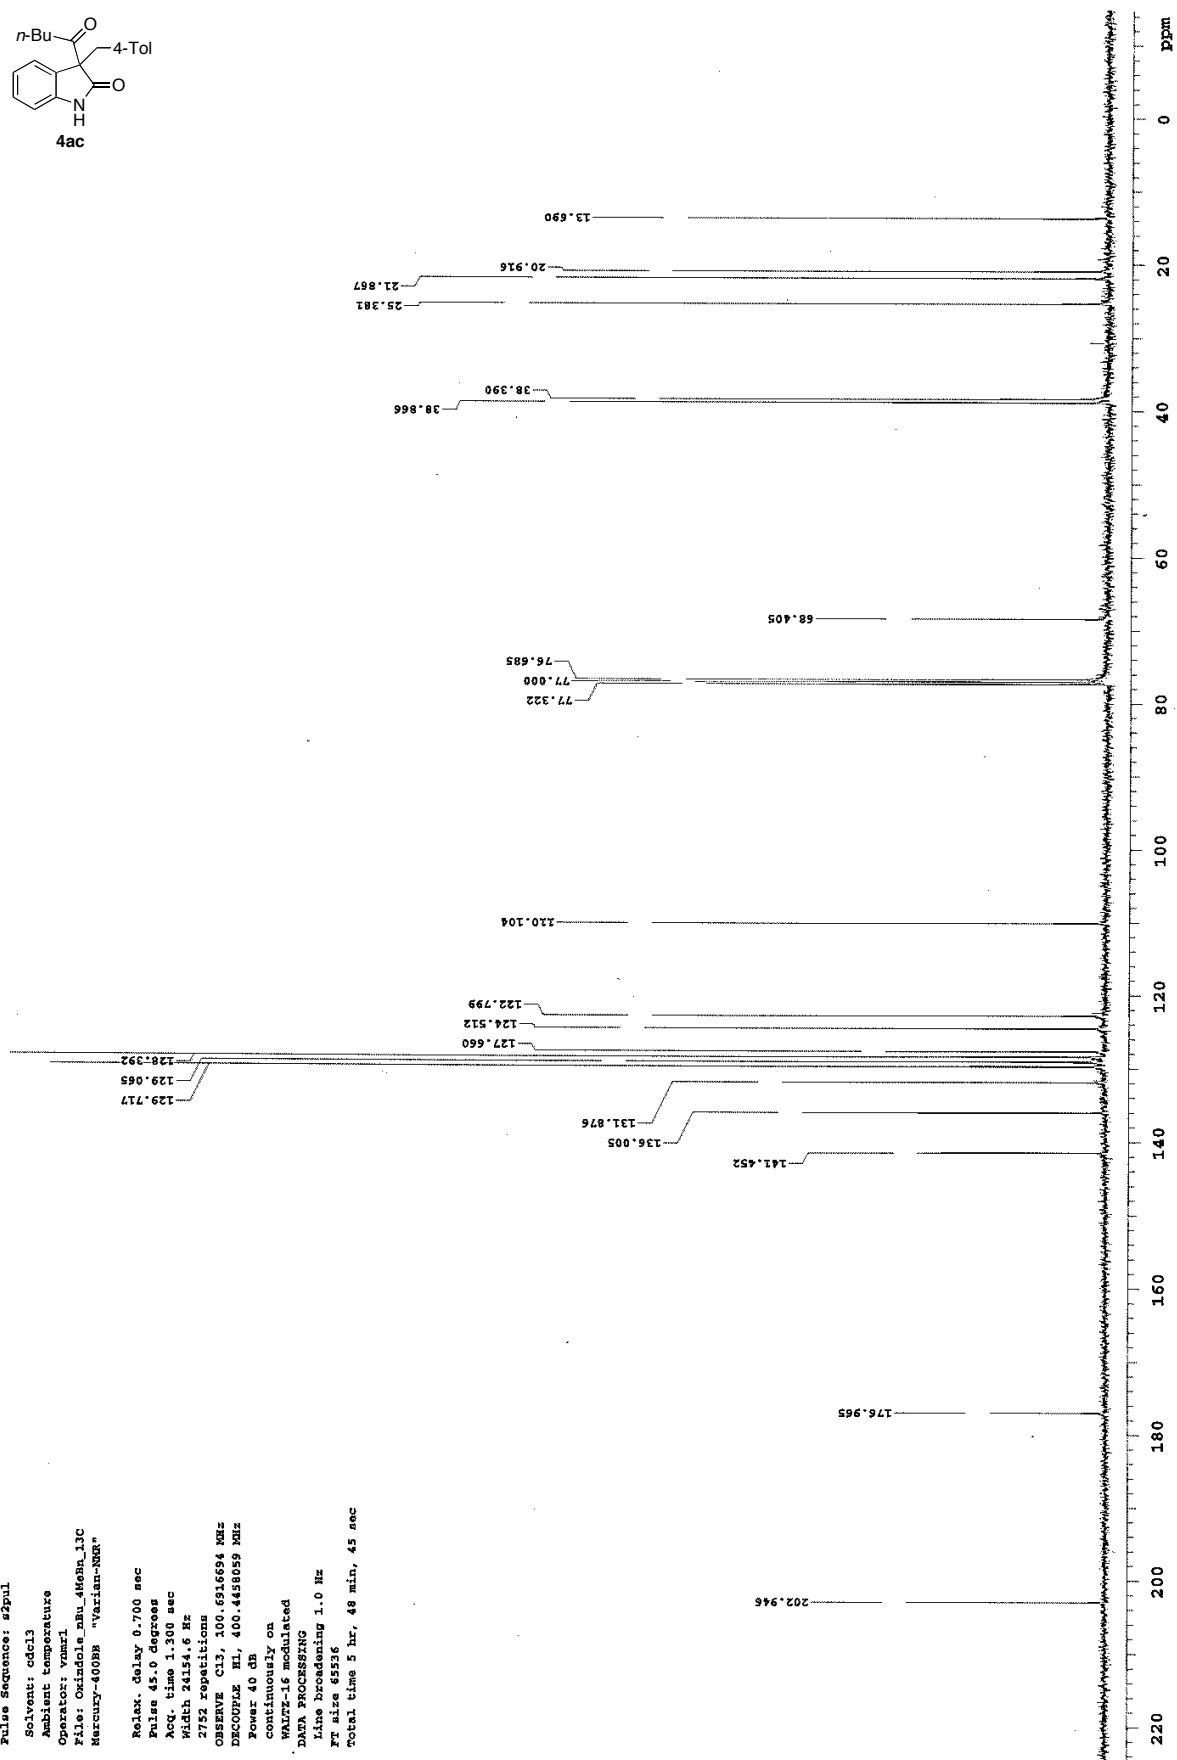

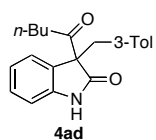

Pulse Sequence: s2pul  
 Solvent: CDCl3  
 Ambient temperature  
 GEMINI-300B3 "varian2"  
 Relax. delay 1.502 sec  
 Pulse 45.0 degrees  
 Acq. time 3.200 sec  
 Width 5000.0 Hz  
 16 repetitions  
 OBSERVE H1, 300.0672313 MHz  
 DATA PROCESSING  
 F2 size 32768  
 Total time 1 min, 24 sec

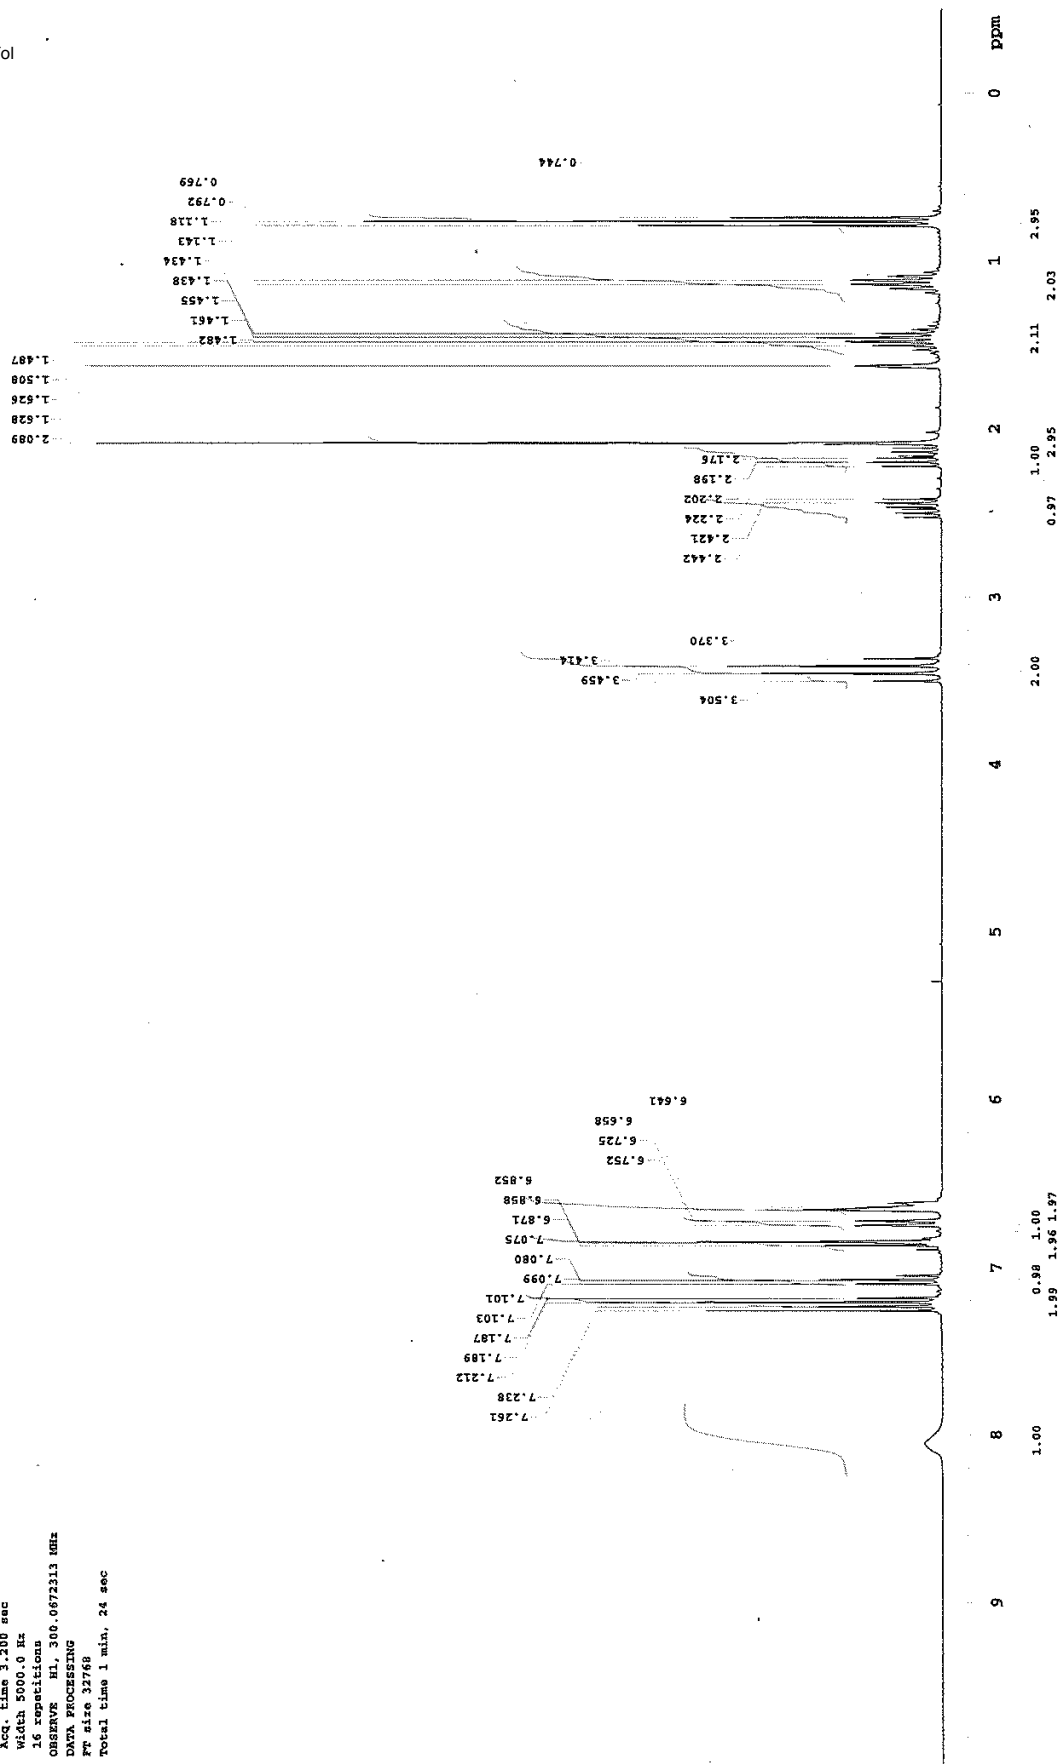

Pulse Sequence: s2pul  
 Solvent: cdcl3  
 Ambient temperature  
 Operator: vnmr1  
 File: Oxindole-nBu\_3Hmz\_13c  
 Mercury-400NB "Varian-NMR"  
 Relax. delay 0.700 sec  
 Pulse 45.0 degrees  
 Acq. time 1.300 sec  
 Width 24154.6 Hz  
 4960 repetitions  
 OBSERVE C13, 100.6316709 MHz  
 DECOUPLE H1, 400.4458059 MHz  
 Power 40 dB  
 continuously on  
 WALTZ-16 modulated  
 DATA PROCESSING  
 Line broadening 1.0 Hz  
 FT size 65536  
 Total time 5 hr, 58 min, 59 sec

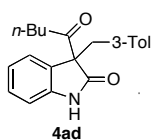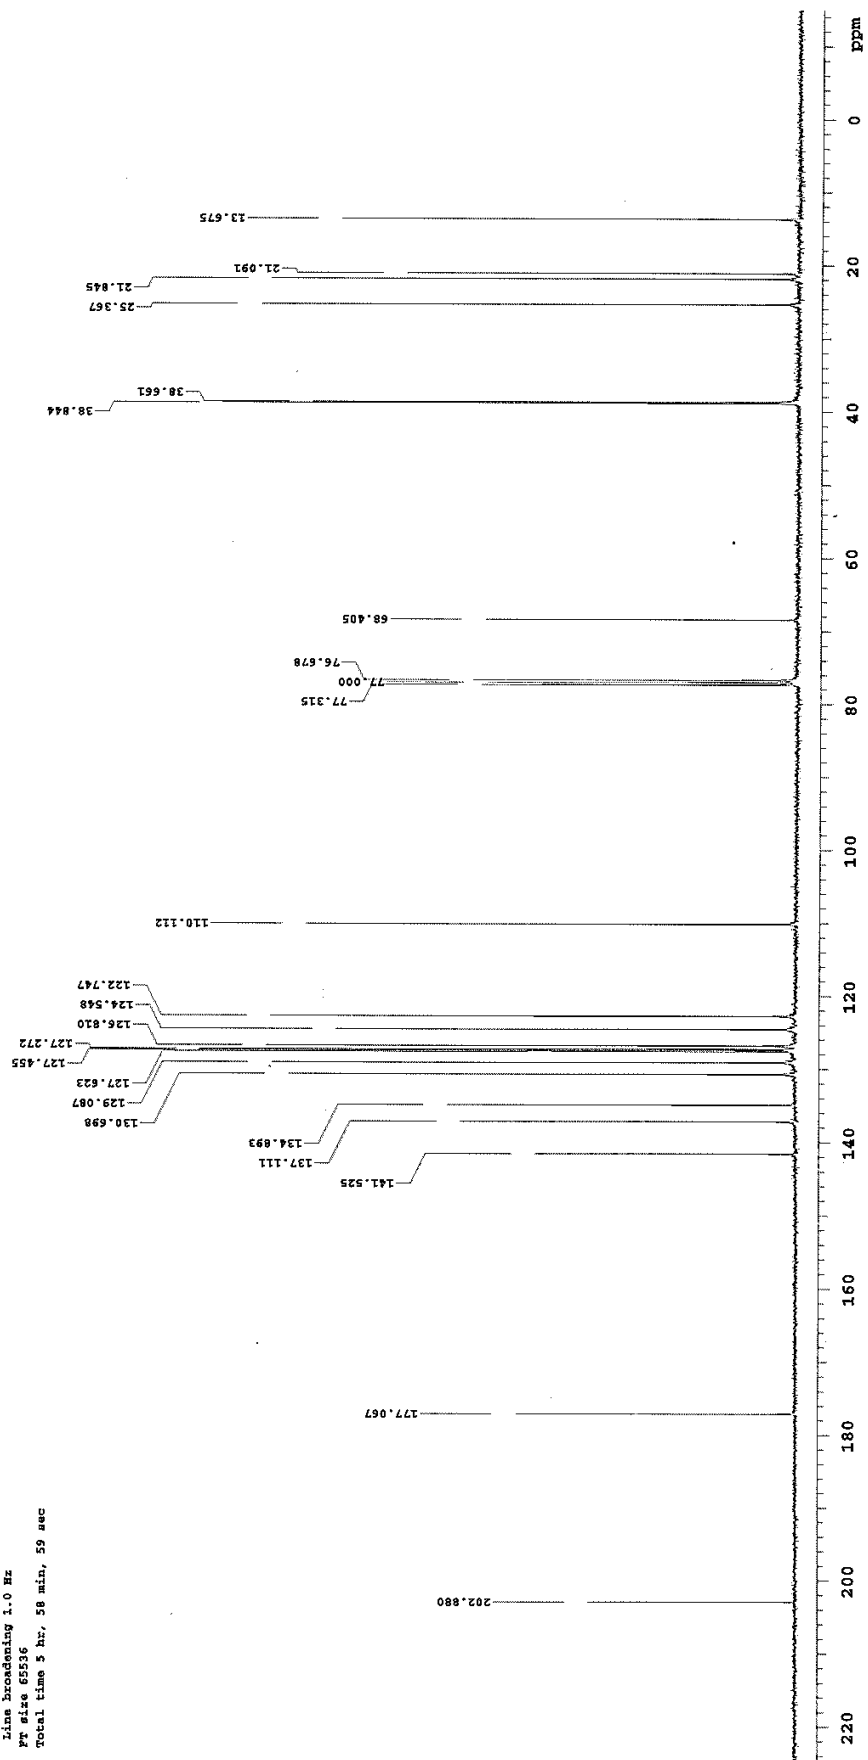

Pulse Sequence: s2p01  
 Solvent: CDCl3  
 Ambient temperature  
 GEMINI-300M3 "varian2"  
 Relax. delay 1.502 sec  
 Pulse 45.0 degrees  
 Acq. time 3.200 sec  
 Width 5000.0 Hz  
 16 repetitions  
 OBSERVE H1, 300.0672346 MHz  
 DATA PROCESSING  
 FT size 32768  
 Total time 1 min, 24 sec

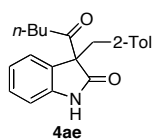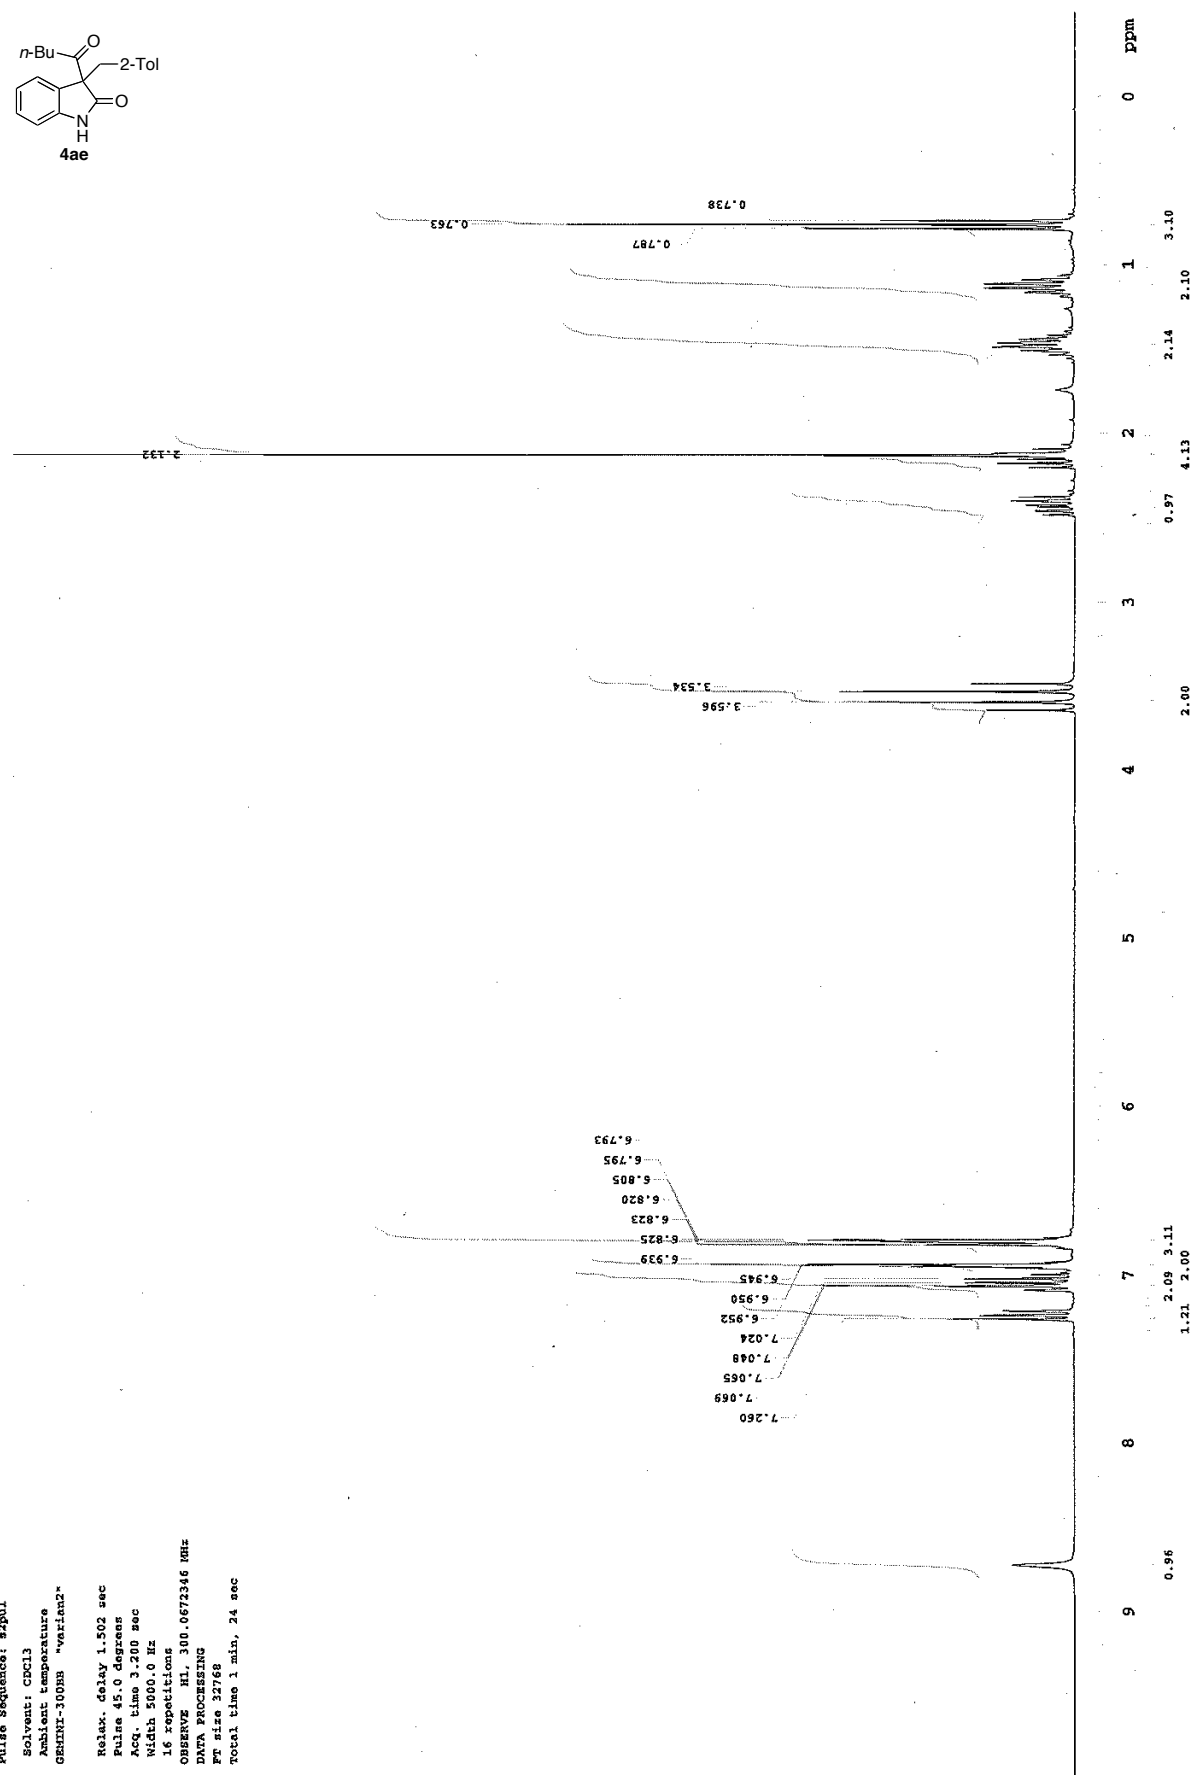

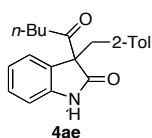

Pulse Sequence: zgpg30  
 Solvent: CDCl3  
 Ambient temperature  
 GEMINI-300M "varian2"  
 Relax. delay 1.158 sec  
 Pulse 45.0 degrees  
 Acq. time 0.842 sec  
 Width 19000.0 Hz  
 12684 repetitions  
 OBSERVE C13, 75.4519686 MHz  
 DECOUPLE H1, 300.0687335 MHz  
 Power 37 dB  
 continuously on  
 WALTZ-16 modulated  
 DATA PROCESSING  
 Line broadening 1.0 Hz  
 FT size 32768  
 Total time 14 hr, 14 min, 45 sec

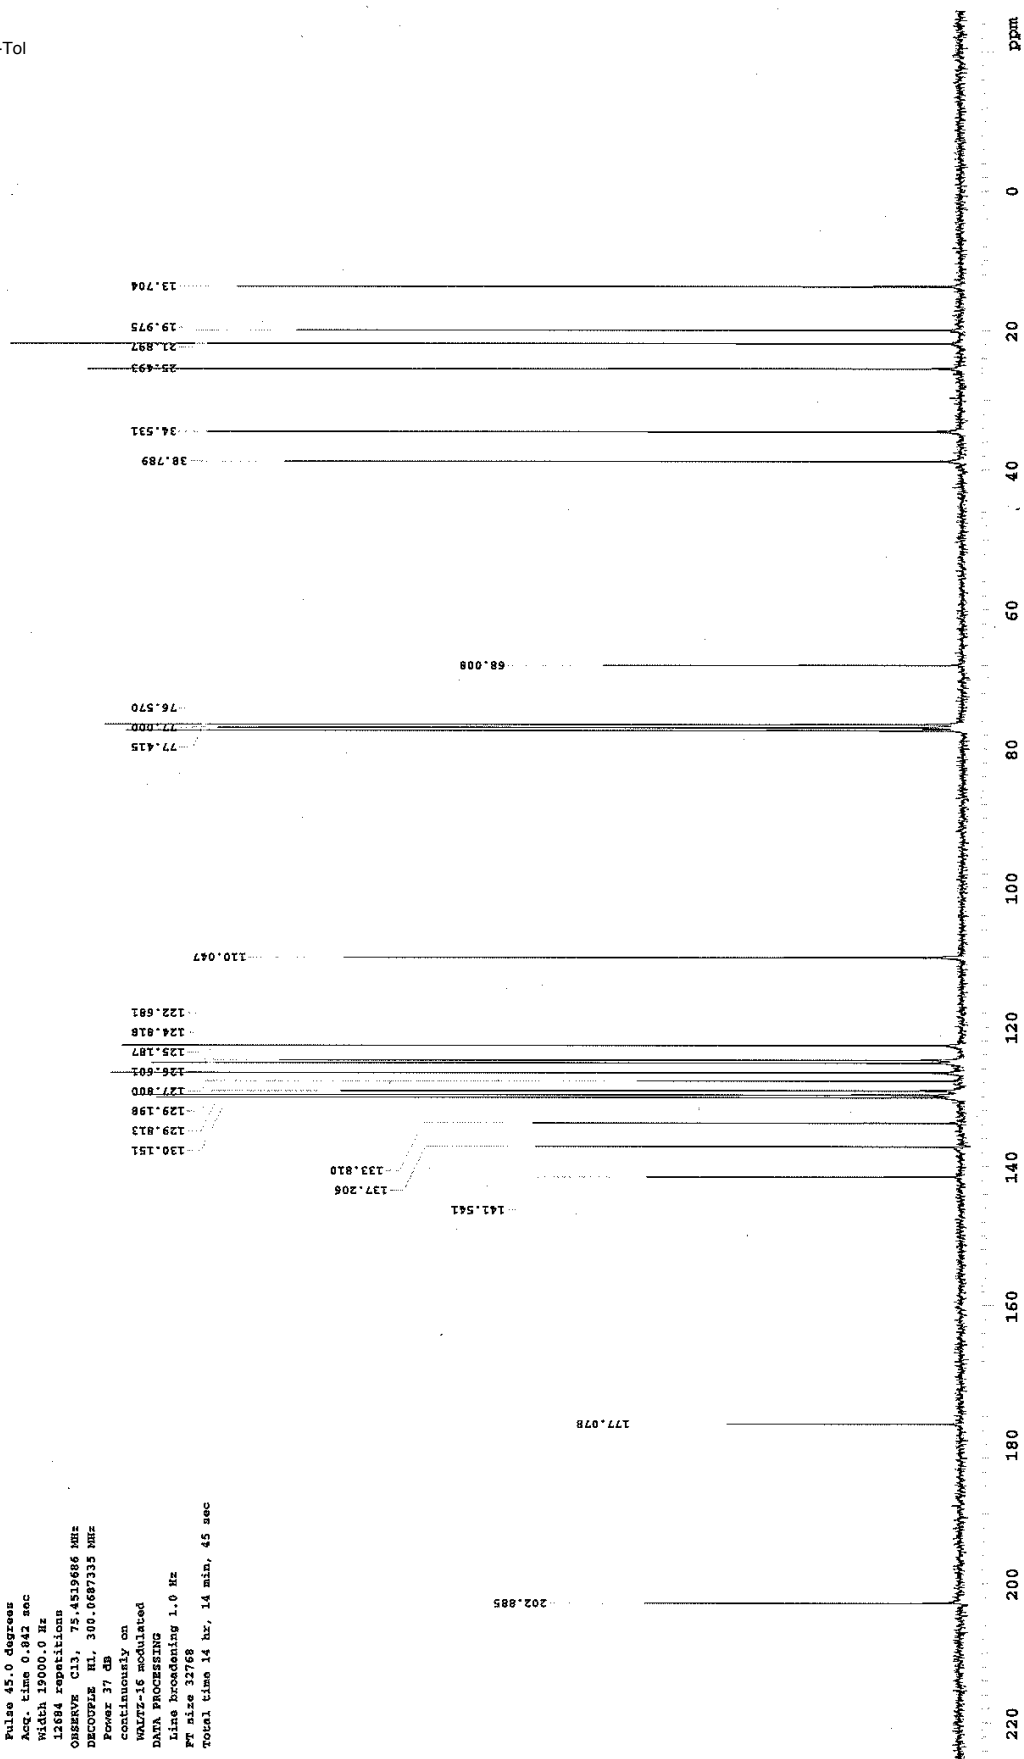



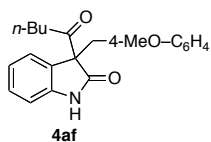

# STANDARD 1H OBSERVE

Pulse Sequence: s2pul  
 Solvent: CDCl3  
 Ambient temperature  
 GEMINI-300B "varian2"  
 Relax. delay 1.502 sec  
 Pulse 45.0 degrees  
 Acq. time 3.200 sec  
 Width 5000.0 Hz  
 16 repetitions  
 OBSERVE H1, 300.0672319 MHz  
 DATA PROCESSING  
 F1 size 32768  
 Total time 1 min, 24 sec

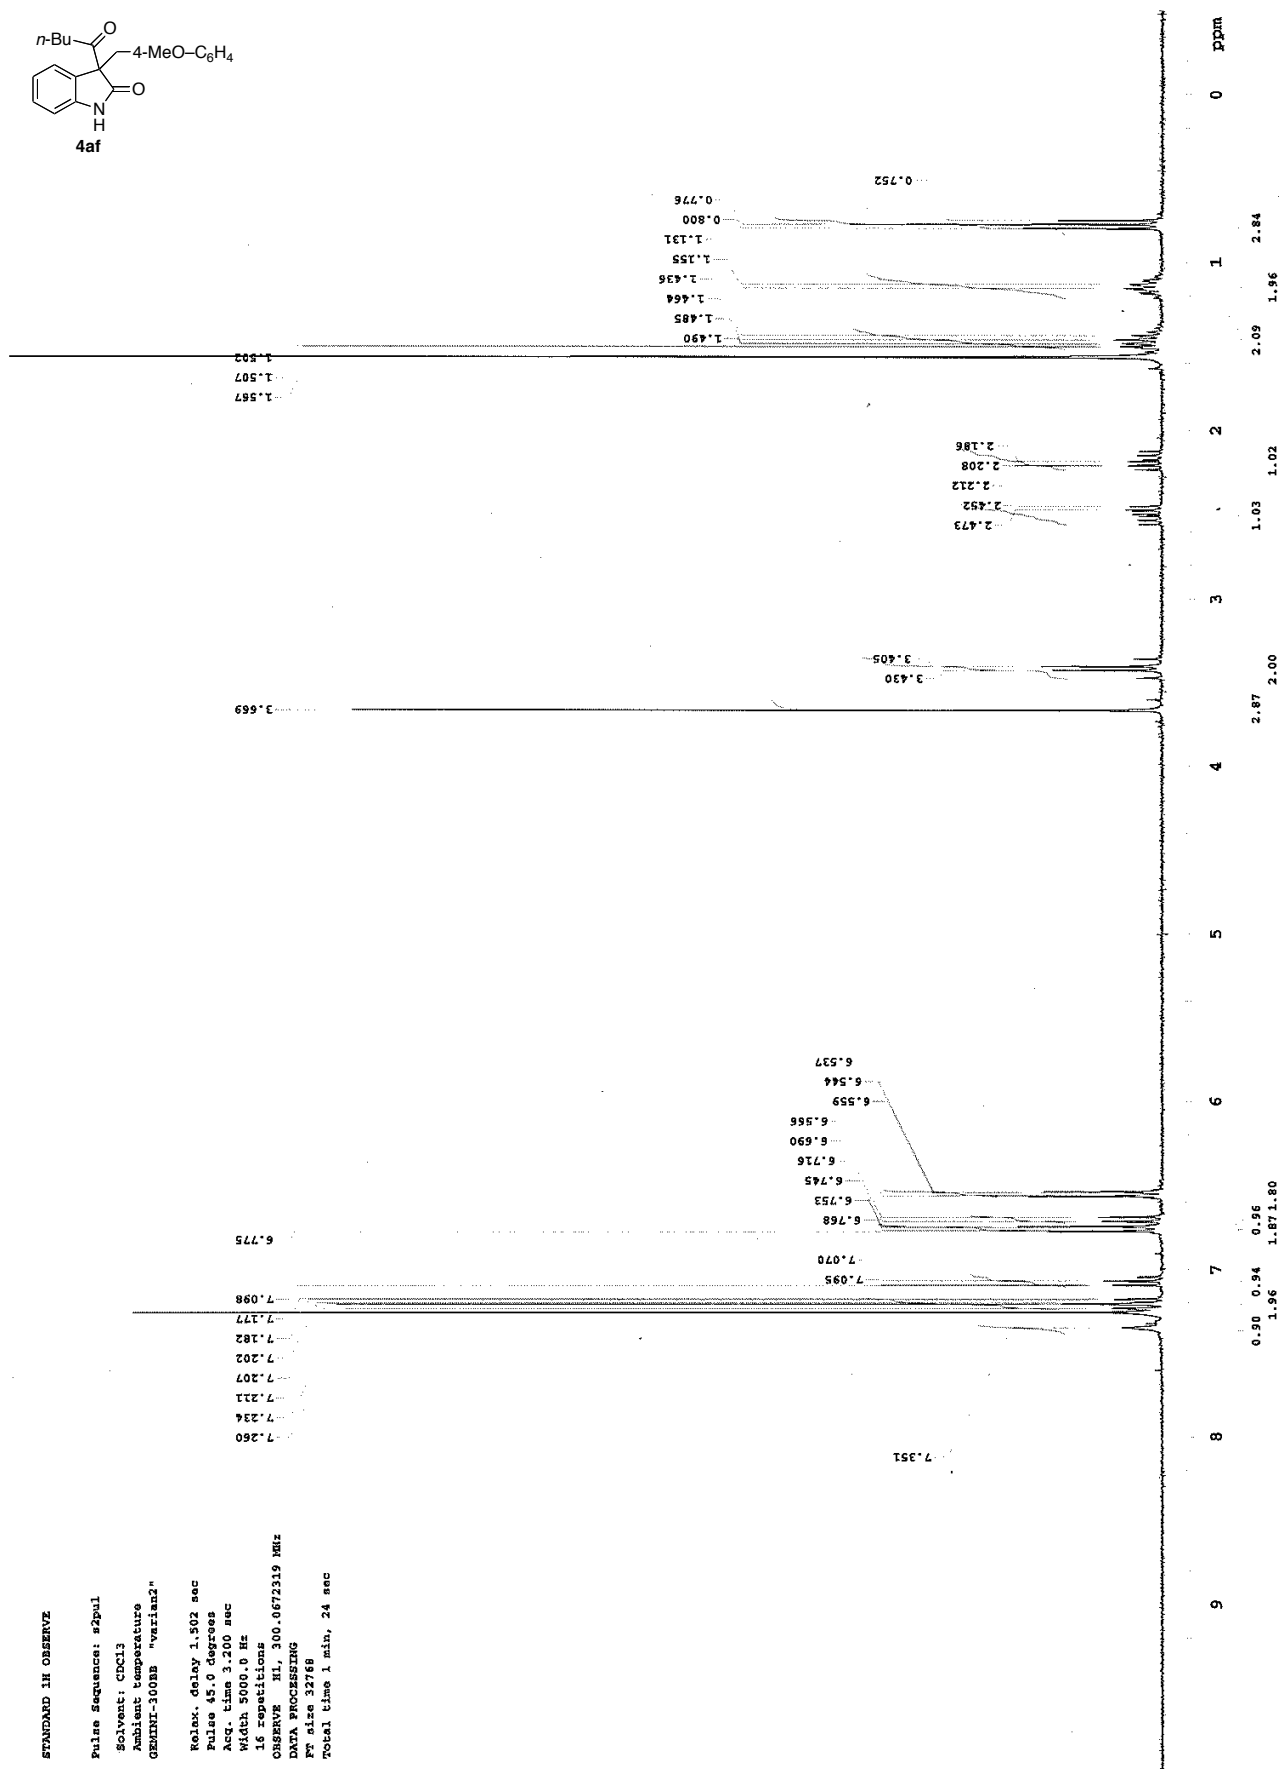

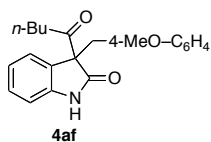

nBu\_MeOHn  
 File: xp  
 Pulse sequence: n2pul  
 Solvent: cdcl3  
 Ambient temperature  
 Operator: vmacl  
 Mercury-400BB "Varian-MMA"  
 Relax. delay 0.700 sec  
 Pulse 45.0 degrees  
 Acq. time 1.300 sec  
 Width 24154.6 Hz  
 16992 repetitions  
 OBSERVE C13, 100.6316702 MHz  
 DECOUPLE H1, 400.4458059 MHz  
 Power 40 dB  
 continuously on  
 WALTZ-16 modulated  
 DATA PROCESSING  
 Line broadening 1.0 Hz  
 FT size 65536  
 Total time 11 hr, 57 min, 53 sec

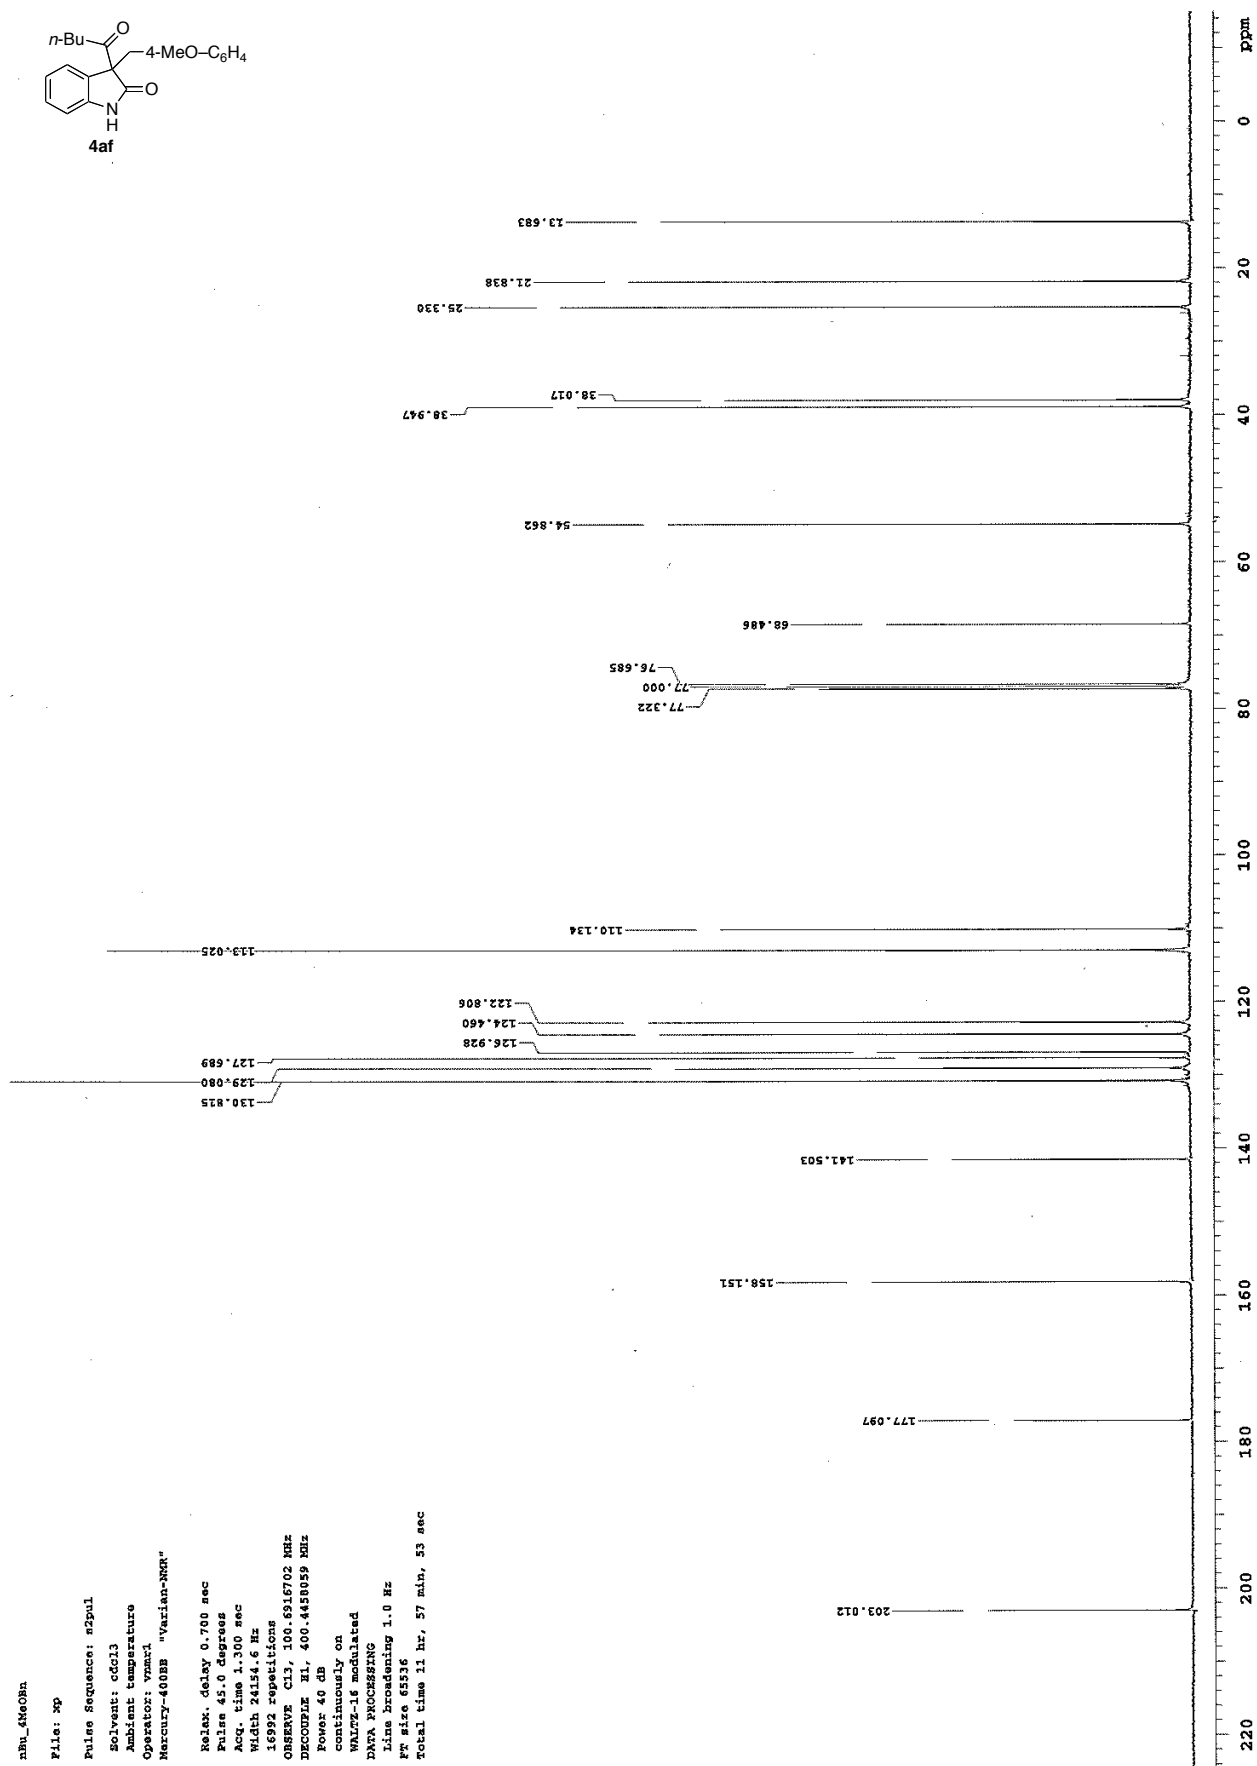

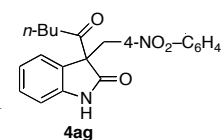

Pulse Sequence: zgpg30  
 Solvent: CDCl3  
 Ambient temperature  
 GEMINI-300MB "varian2"  
 Relax. delay 1.502 sec  
 Pulse 45.0 degrees  
 Acq. time 3.240 sec  
 Width 5000.0 Hz  
 32 repetitions  
 OBSERVE HL, 300.0672343 MHz  
 DATA PROCESSING  
 FT size 32768  
 Total time 2 min, 39 sec

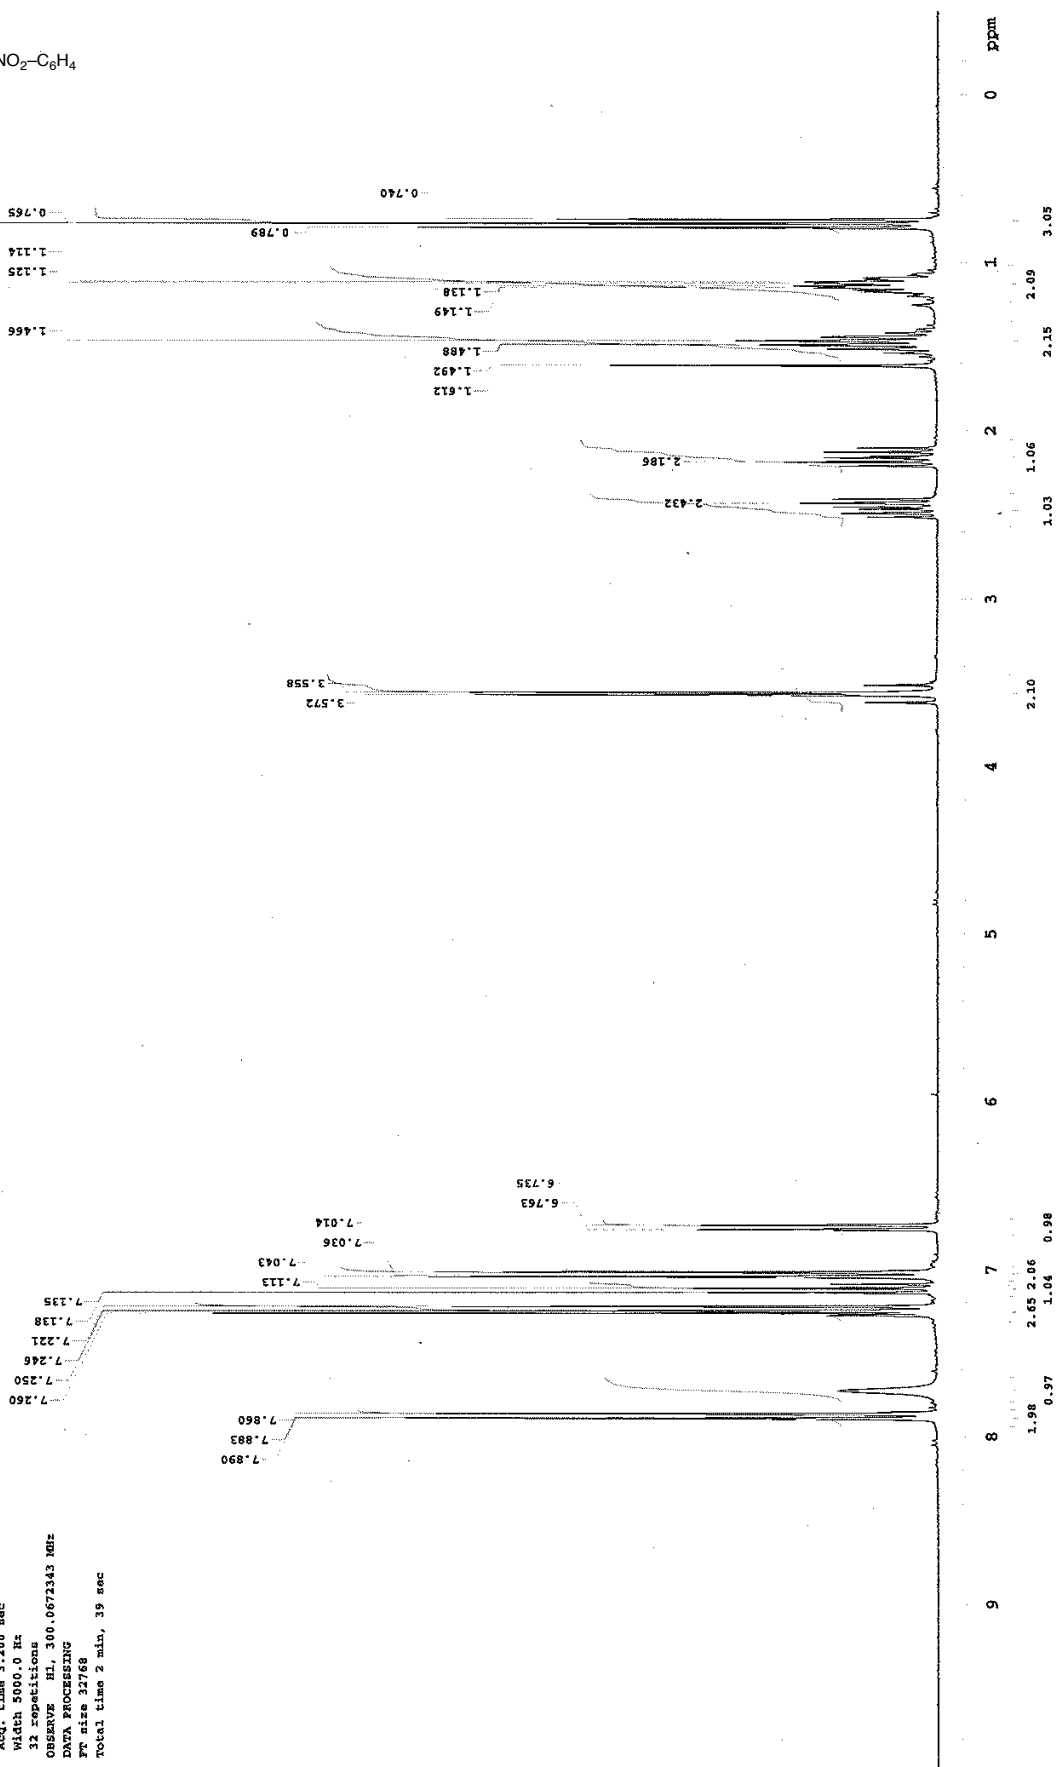

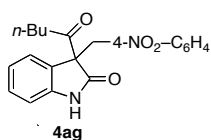

Pulse Sequence: zgpg30  
 Solvent: CDCl<sub>3</sub>  
 Ambient Temperature  
 GEMINI-300BB "varian2"  
 Relax. delay 1.158 sec  
 Pulse 45.0 degrees  
 Acq. time 0.842 sec  
 Width 19000.0 Hz  
 12460 Repetitions  
 OBSERVE C13, 75.4519663 MHz  
 DECOUPLE H1, 300.0687335 MHz  
 Power 37 dB  
 continuously on  
 WALTZ-16 modulated  
 DATA PROCESSING  
 Line broadening 1.0 Hz  
 FT size 32768  
 Total time 14 hr, 14 min, 45 sec

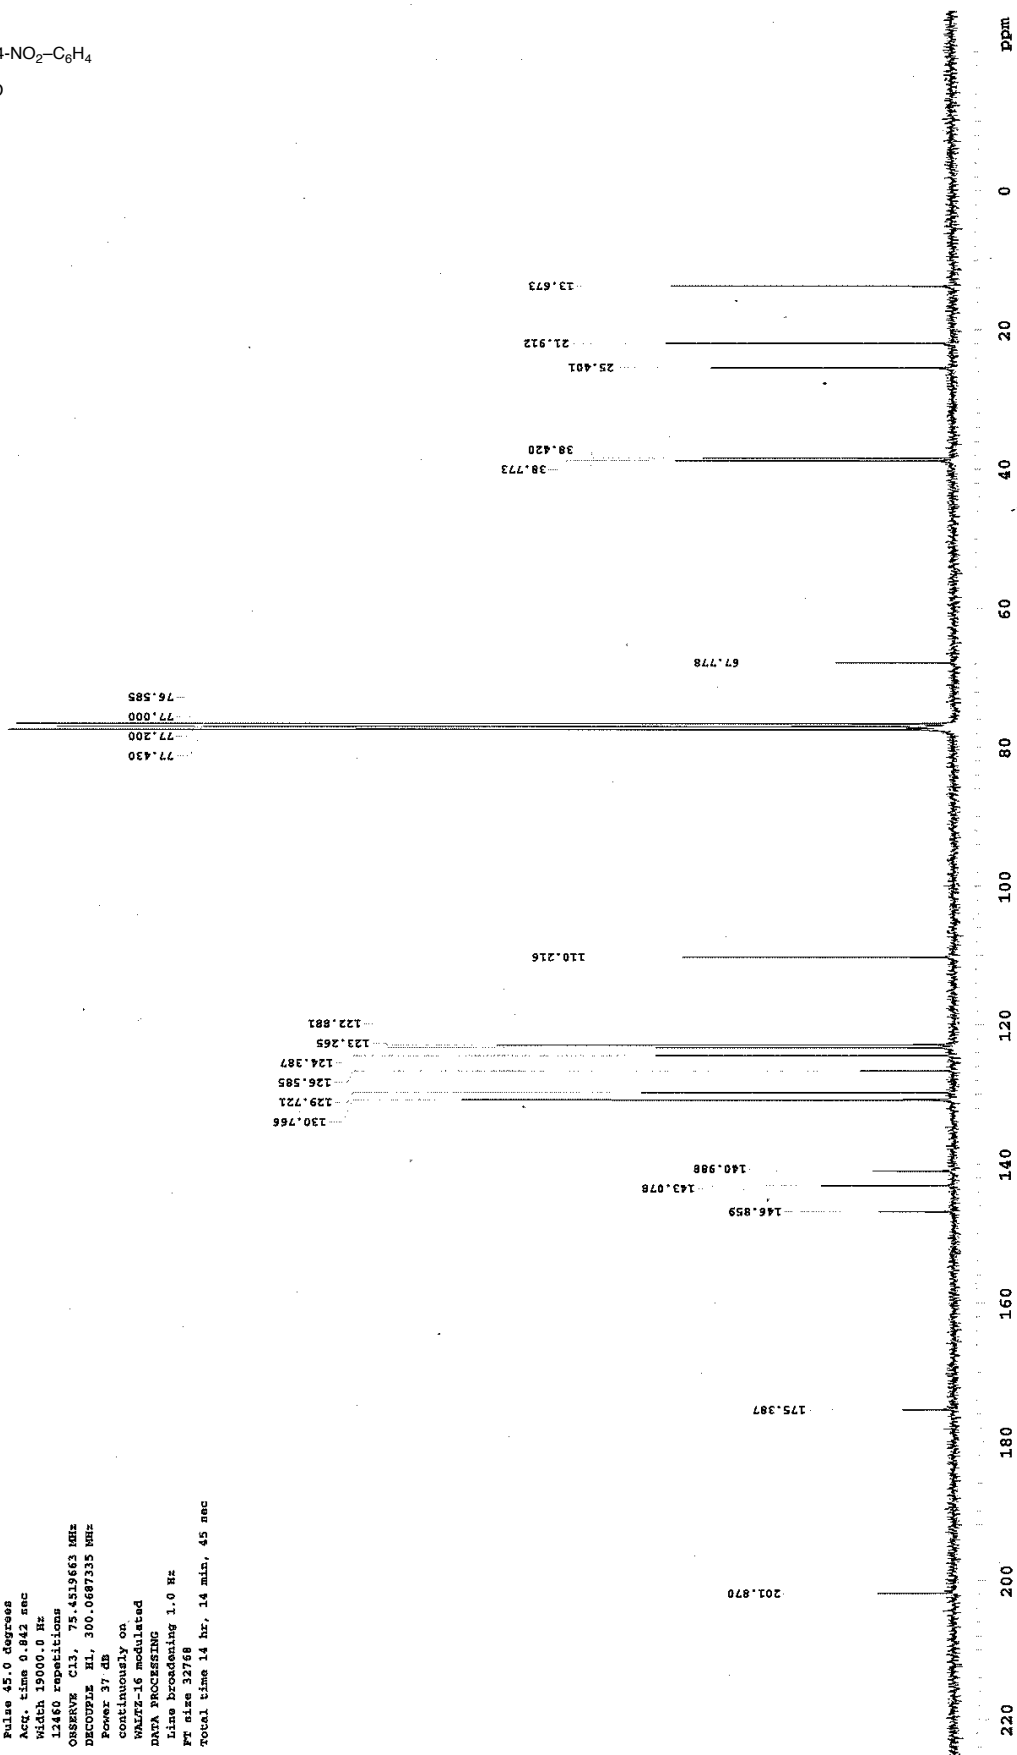

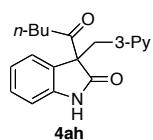

File: xp

Pulse Sequence: w2pul

Solvent: cdcl3

Ambient temperature

Operator: vmmr1

Mercury-400NB "Varian-NMR"

Relax. delay 1.500 sec

Pulse 45.0 degree

Acq. time 3.500 sec

Width 6406.1 Hz

16 repetitions

OBSERVE F1, 400.4437687 MHz

DATA PROCESSING

Line broadening 0.2 Hz

FT size 65536

Total time 1 min, 32 sec

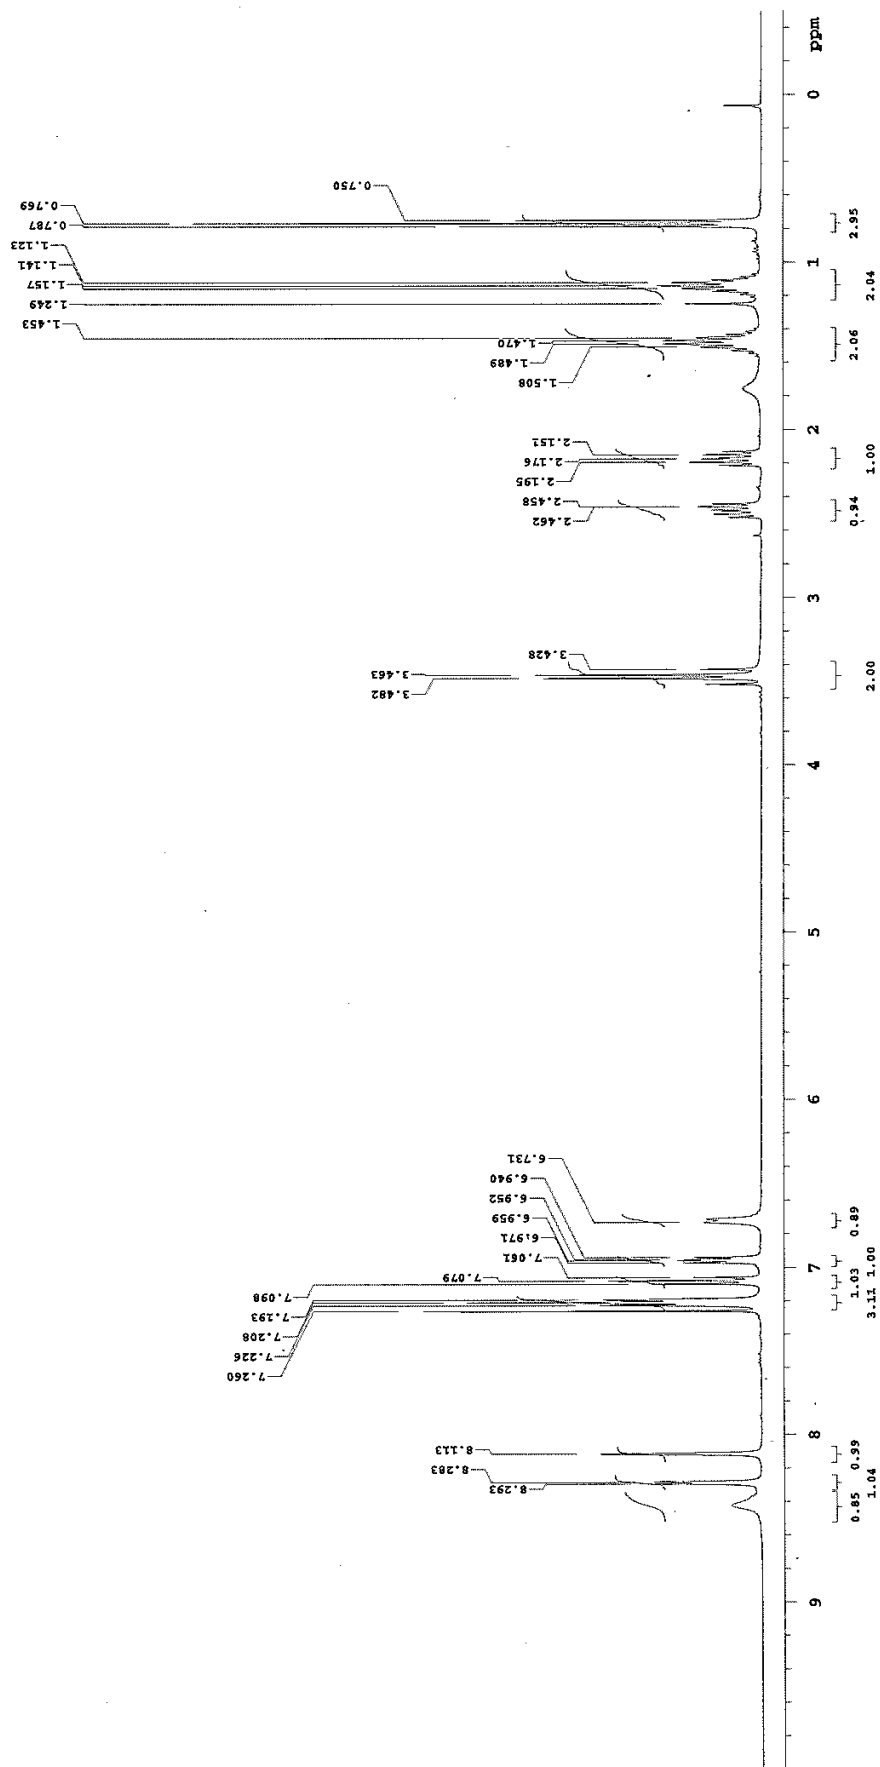

Pulse sequence: s2pul  
 Solvent: cdcl3  
 Ambient temperature  
 Operator: vnmr1  
 Mercury-400BN Varian-NMR

Relax. delay 0.700 sec  
 Pulse 45.0 degrees  
 Acq. time 1.300 sec  
 Width 24154.6 Hz  
 10000 repetitions  
 OBSERVE C13, 100.631687 MHz  
 DECOUPLE H1, 400.4458059 MHz  
 Power 40 dB  
 continuously on  
 WALTZ-16 modulated  
 DATA PROCESSING  
 Line broadening 1.0 Hz  
 FT size 65536  
 Total time 6 hr, 19 min, 25 sec

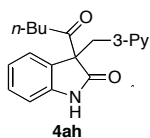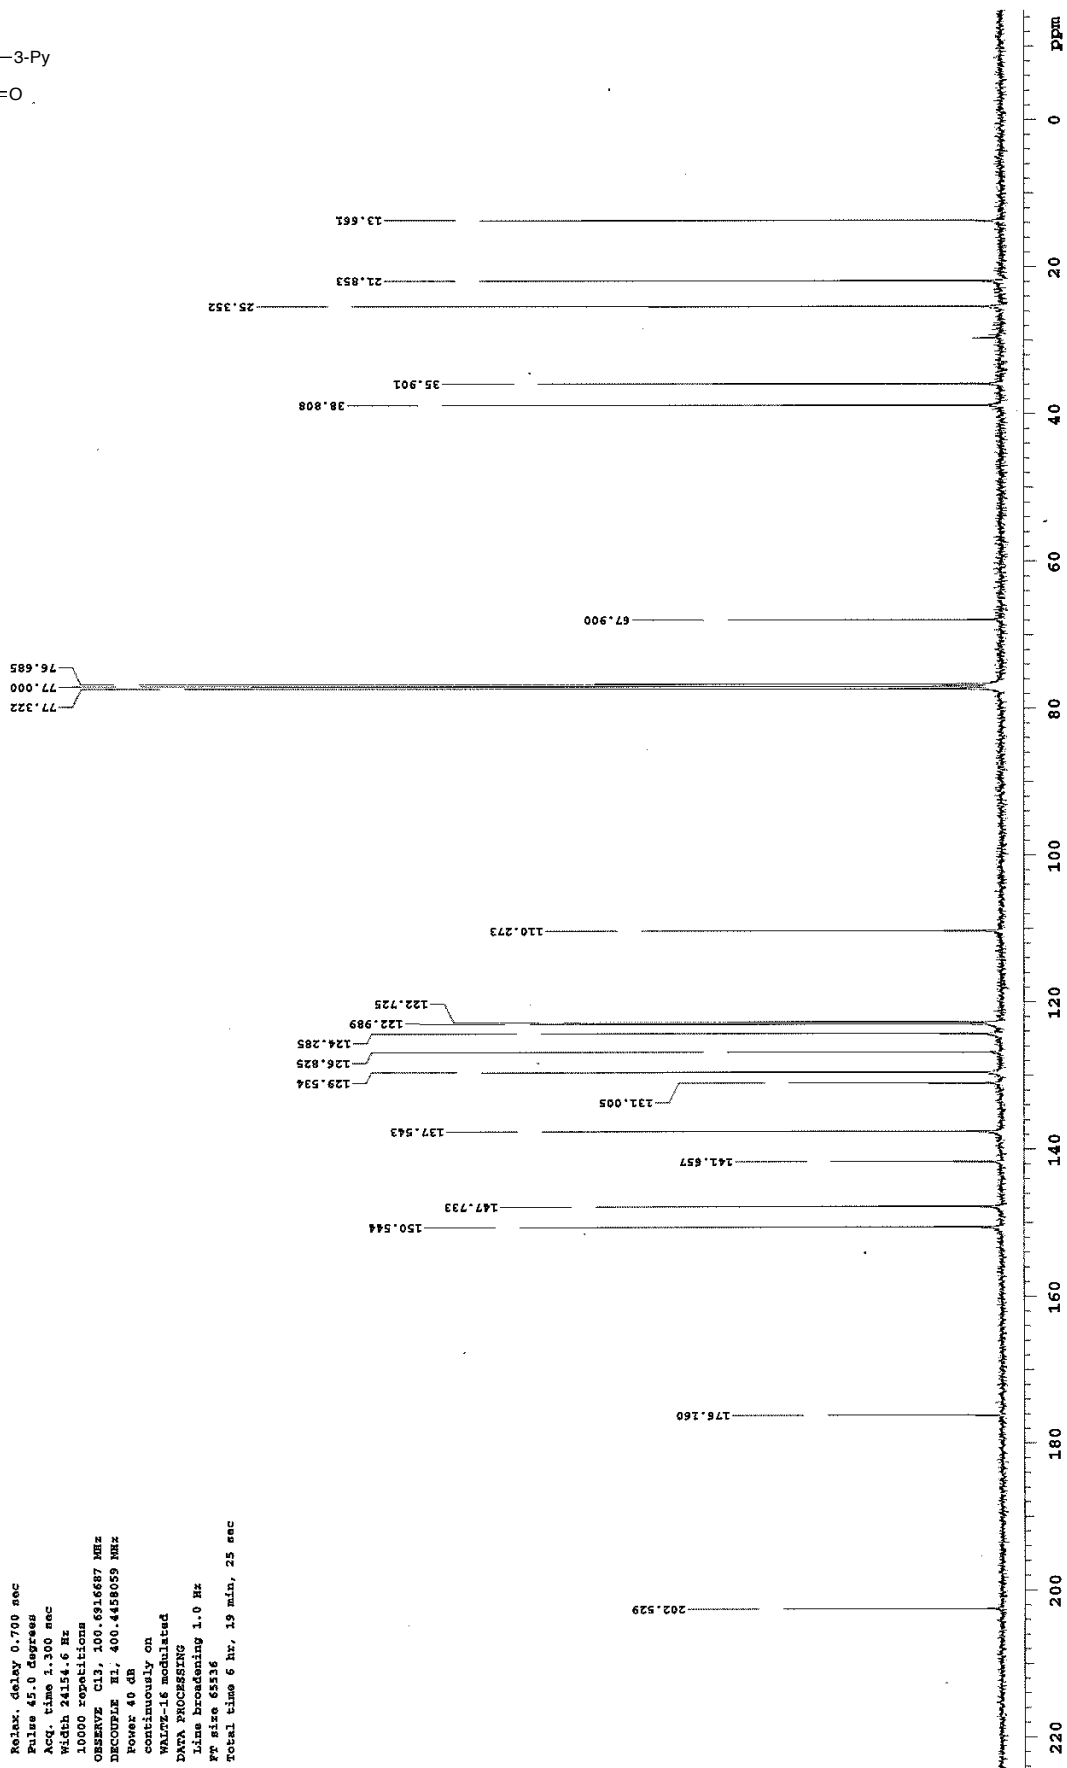

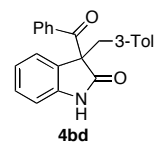

Pulse Sequence: #2pul  
 Solvent: cdcl3  
 Ambient temperature  
 Operator: vumx1  
 Mercury-400MHz "Varian-NMR"  
 Relax. delay 1.500 sec  
 Pulse 45.0 degrees  
 Acq. time 3.502 sec  
 Width 6402.0 Hz  
 16 repetitions  
 OBSERVE M1, 400.4411638 MHz  
 DATA PROCESSING  
 Line broadening 0.2 Hz  
 FT size 65536  
 Total time 1 min, 32 sec

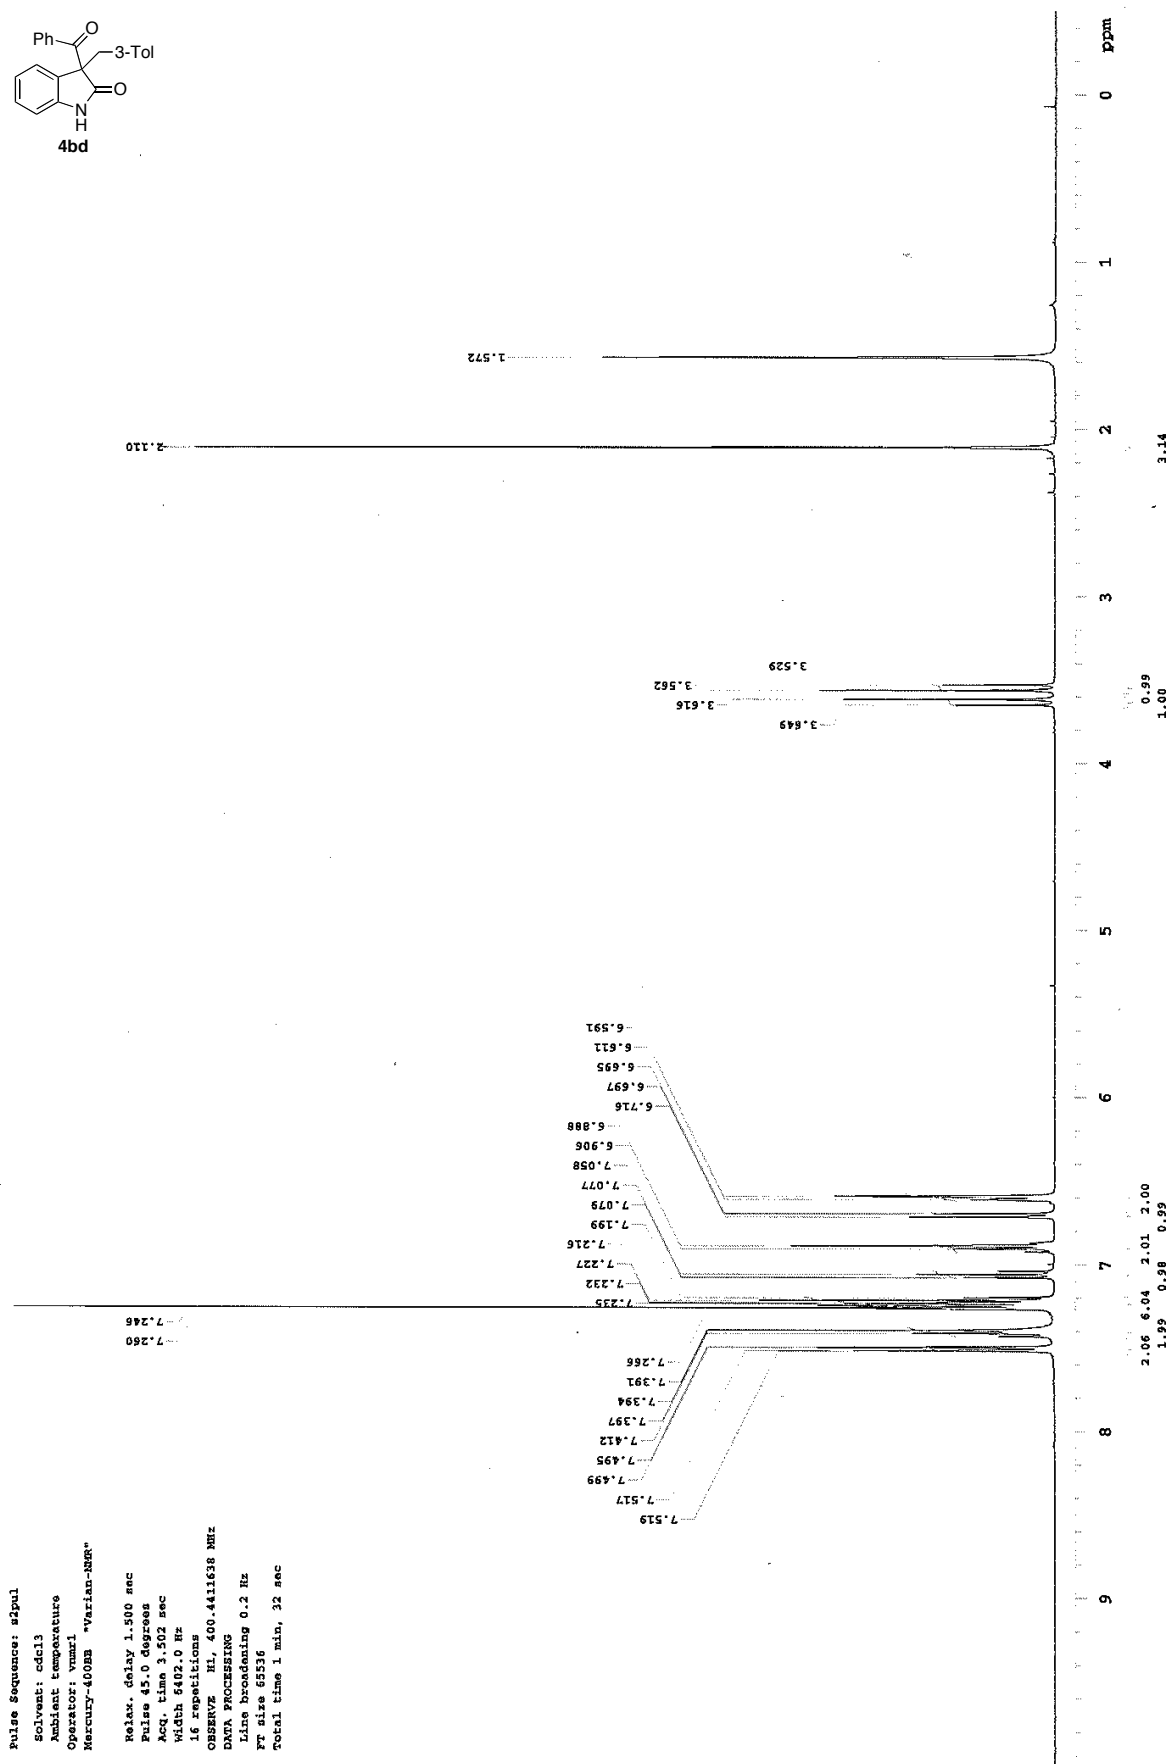

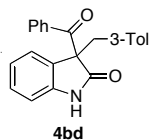

Pulse Sequence: zgpg30  
 Solvent: cdcl3  
 Ambient temperature  
 Operator: vmari  
 Mercury-400BB "Varian-MG"  
 Relax. delay 0.700 sec  
 Pulse 45.0 degrees  
 Acq. time 1.300 sec  
 Width 24154.6 Hz  
 5216 observations  
 OBSERVE CH1, 100.691042 MHz  
 DECOUPLE H1, 400.441166 MHz  
 Power 40 dB  
 continuously on  
 WALTZ-16 modulated  
 DATA PROCESSING  
 Line broadening 1.0 Hz  
 FT size 65536  
 Total time 11 hr, 57 min, 53 sec

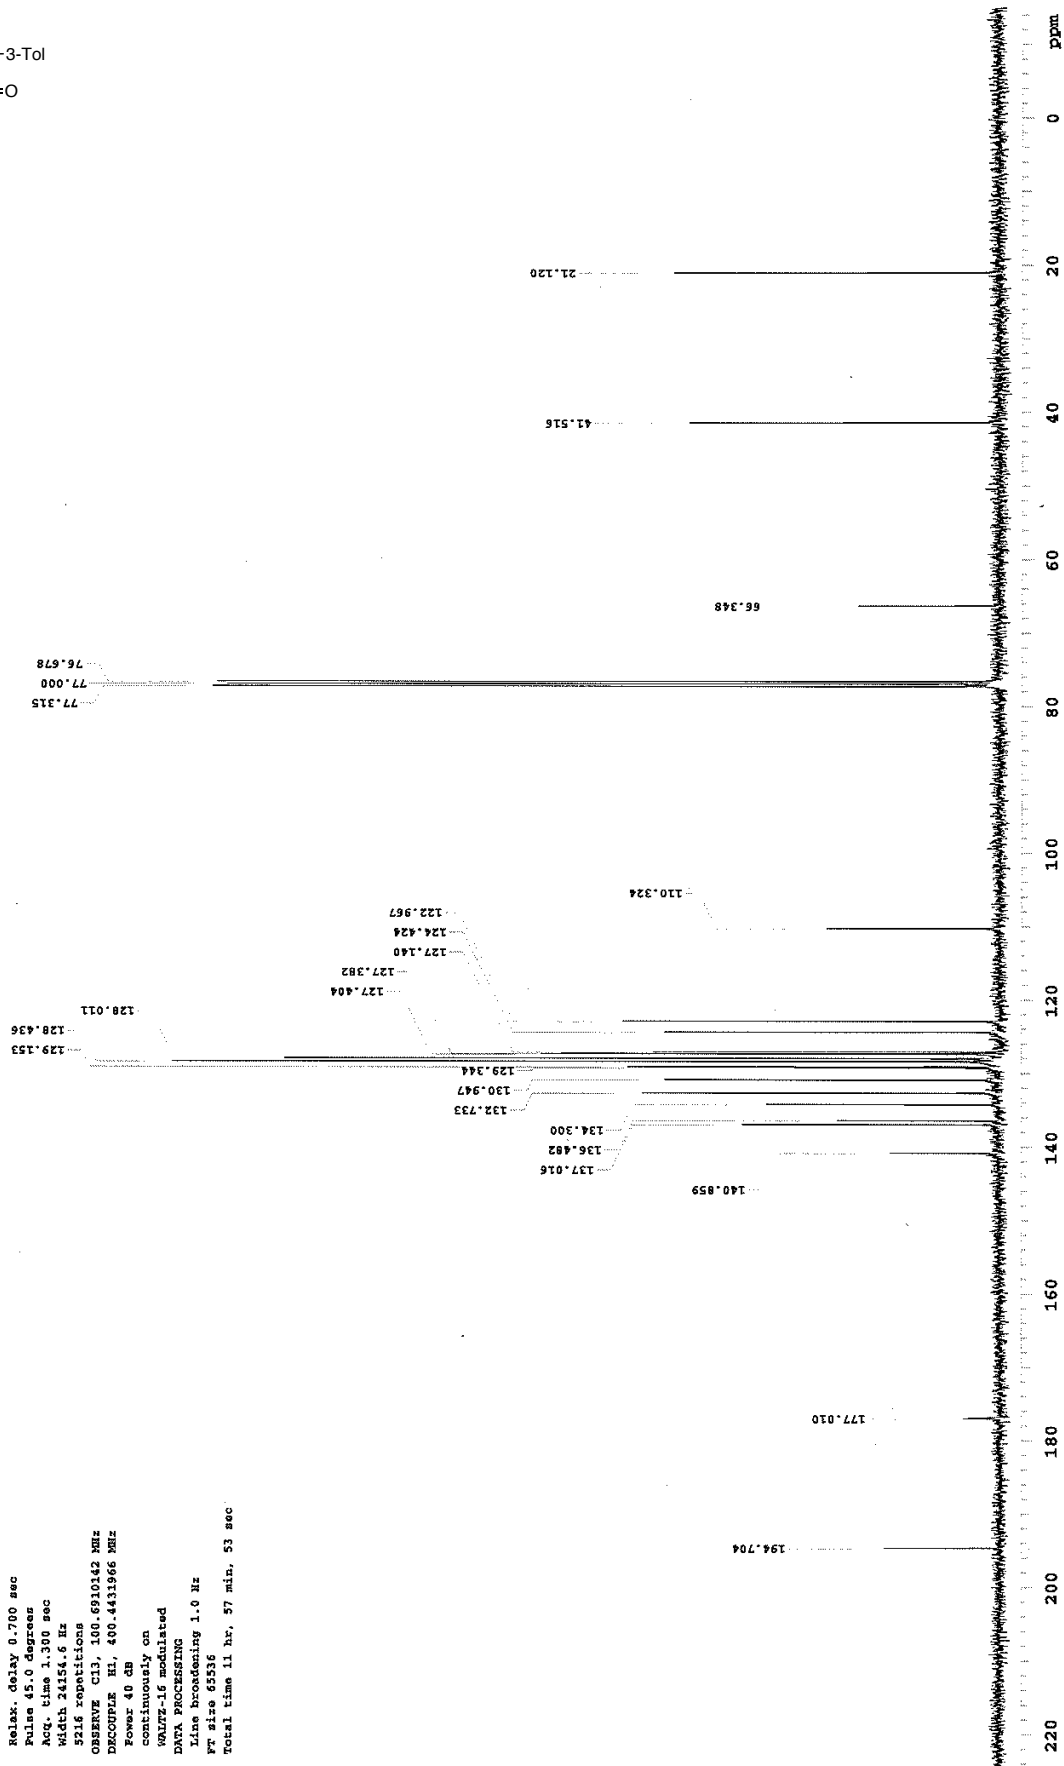



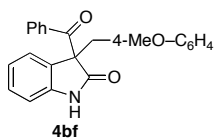

File: xp

Pulse Sequence: #2pul  
 Solvent: cdcl3  
 Ambient temperature  
 Operator: vnmr1  
 Mercury-400NB "Varian-NMR"  
 Relax. delay 1.500 sec  
 Pulse 45.0 degrees  
 Acq. time 3.500 sec  
 Width 6406.1 Hz  
 16 repetitions  
 OBSERVE H1, 400.4437687 MHz  
 DATA PROCESSING  
 Line broadening 0.2 Hz  
 FT size 65536  
 Total time 1 min, 32 sec

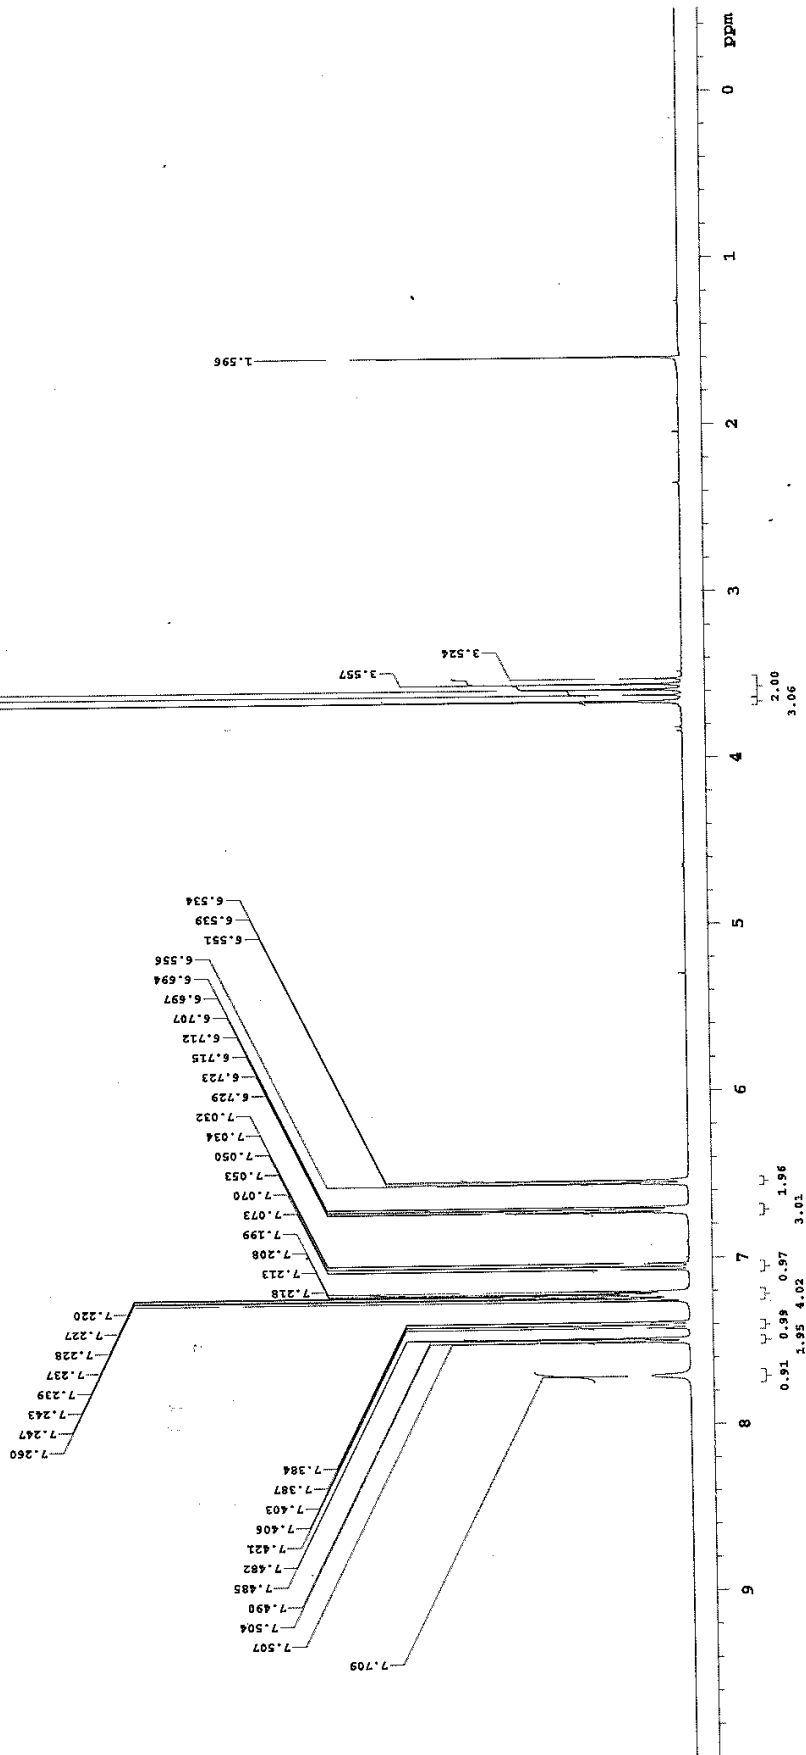

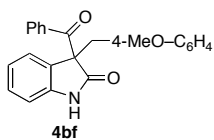

Relax. delay 0.700 sec  
Pulse 45.0 degrees  
Acq. time 1.300 sec  
Width 24154.6 Hz  
912 repetitions  
OBSERVE CH, 100.6916724 MHz  
DECOUPLE H1, 400.4456059 MHz  
Power 40 dB  
continuously on  
WALTZ-16 modulated  
DATA PROCESSING  
Line broadening 1.0 Hz  
FT size 65536  
Total time 58 hr, 7 min, 7 sec

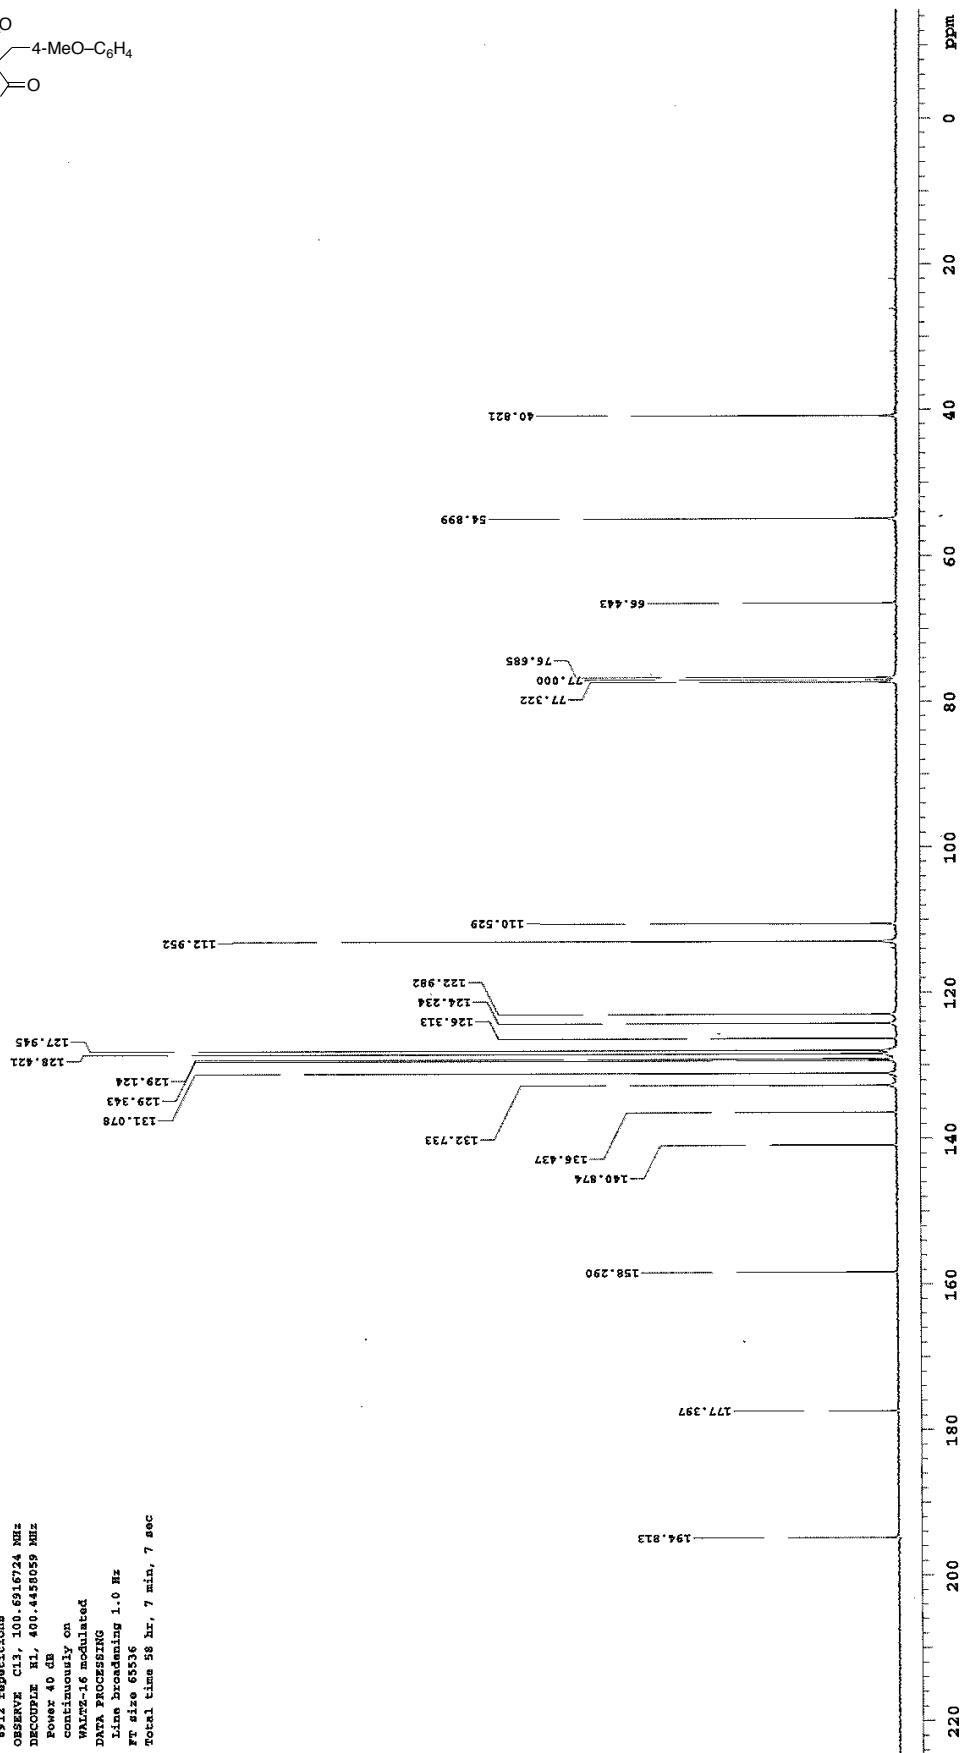

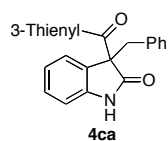

Relax. delay 1.500 sec  
Pulse 45.0 degrees  
Acq. time 3.502 sec  
Width 6402.0 Hz  
16 repetitions  
OBSERVE HL, 400.4411642 MHz  
DATA PROCESSING  
Line broadening 0.2 Hz  
FT size 65536  
Total time 1 min, 32 sec

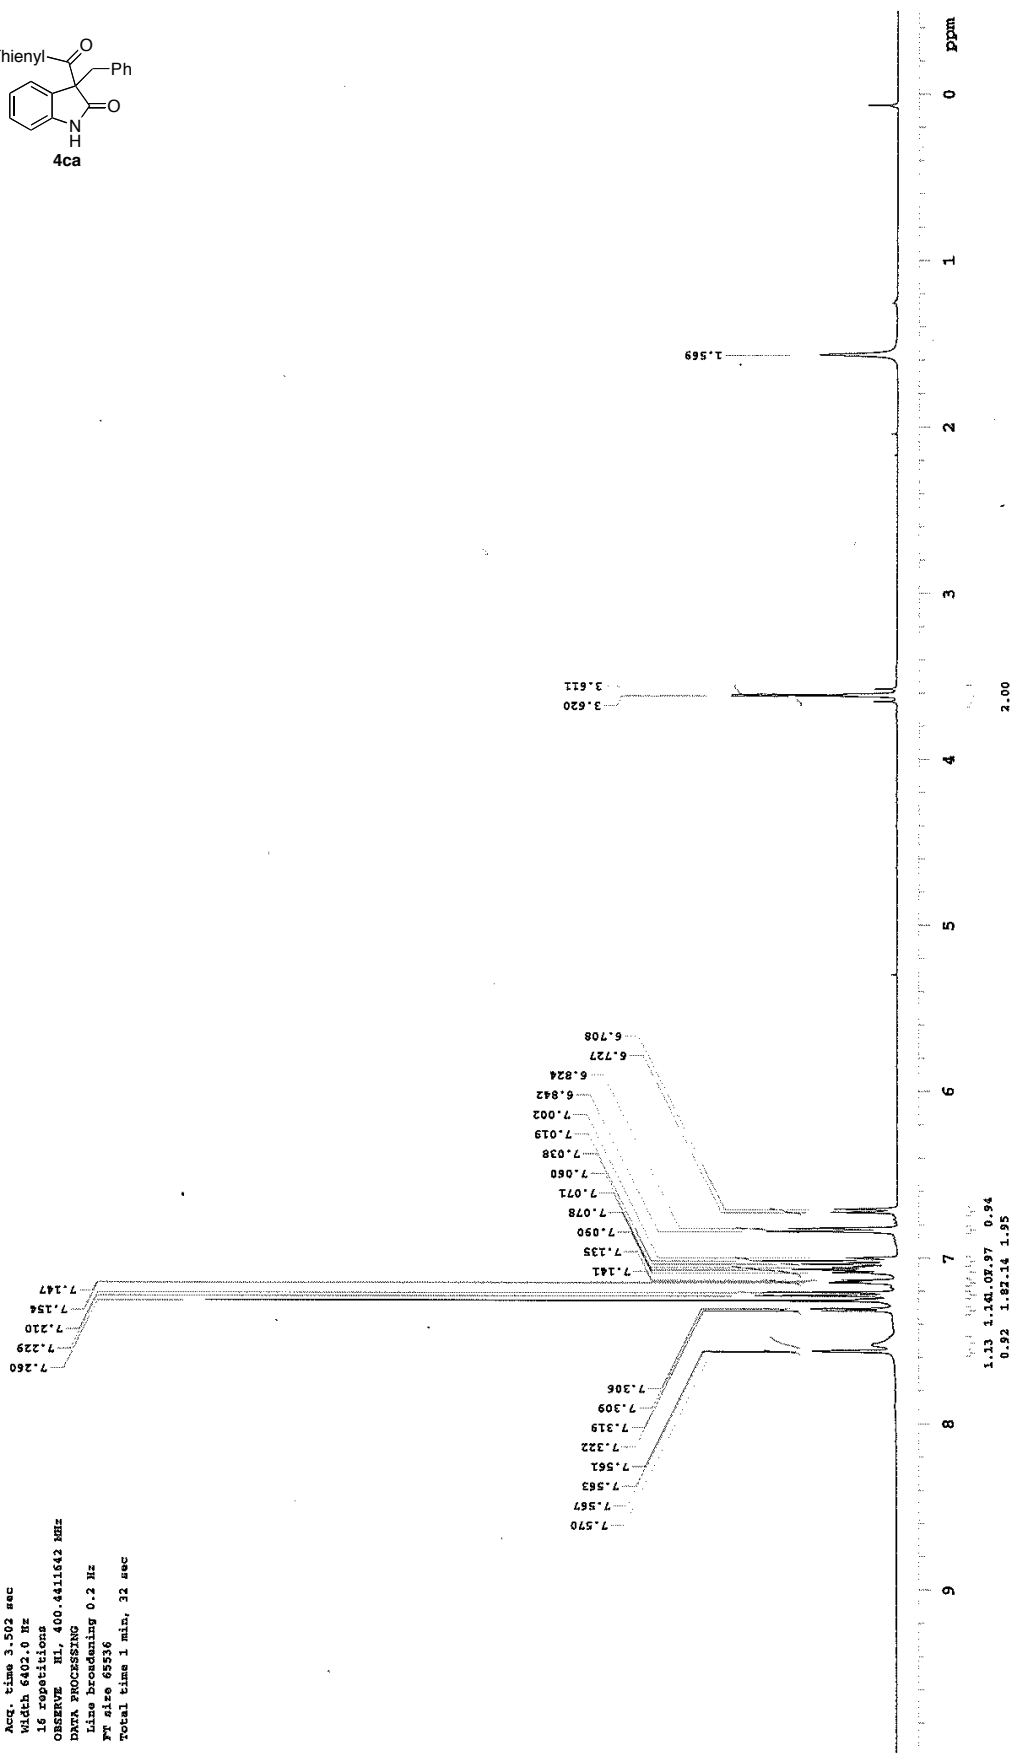

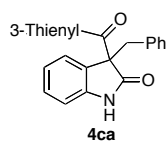

Relax. delay 0.700 sec  
Pulse 45.0 degrees  
Acq. time 1.300 sec  
Width 24154.6 Hz  
27712 repetitions  
OBSERVE C13, 100.6310103 MHz  
DECOUPLE H1, 400.4431966 MHz  
Power 40 dB  
continuously on  
WALTZ-16 modulated  
DATA PROCESSING  
Line broadening 1.0 Hz  
FT size 65536  
Total time 23 hr, 14 min, 50 sec

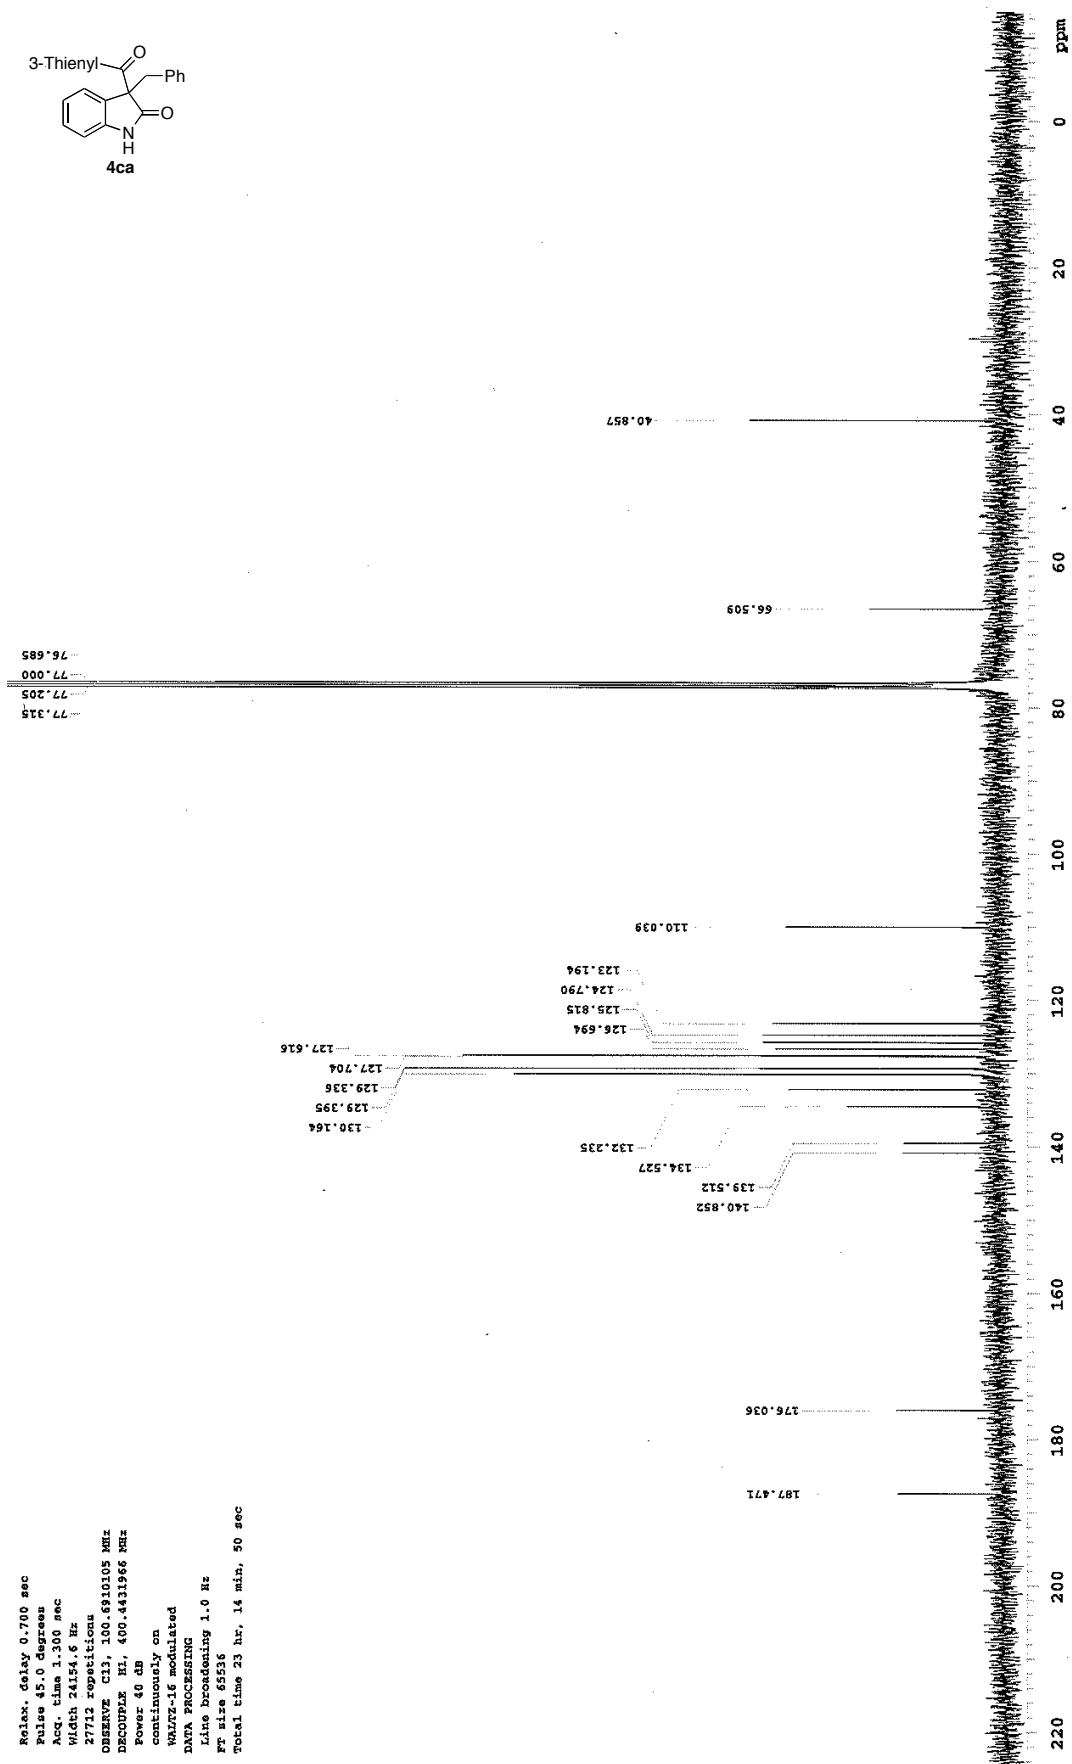

File: xp

Pulse Sequence: s2pul

Solvent: cdcl3

Ambient temperature

Operator: vmmr1

Mercury-400NB "Varian-NMR"

Relax. delay 1.500 sec

Pulse 45.0 degrees

Acq. time 3.590 sec

Width 6400.1 Hz

16 repetitions

OBSERVE NL 400.4437687 MHz

DATA PROCESSING

Line broadening 0.2 Hz

FT size 65536

Total time 1 min, 32 sec

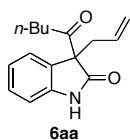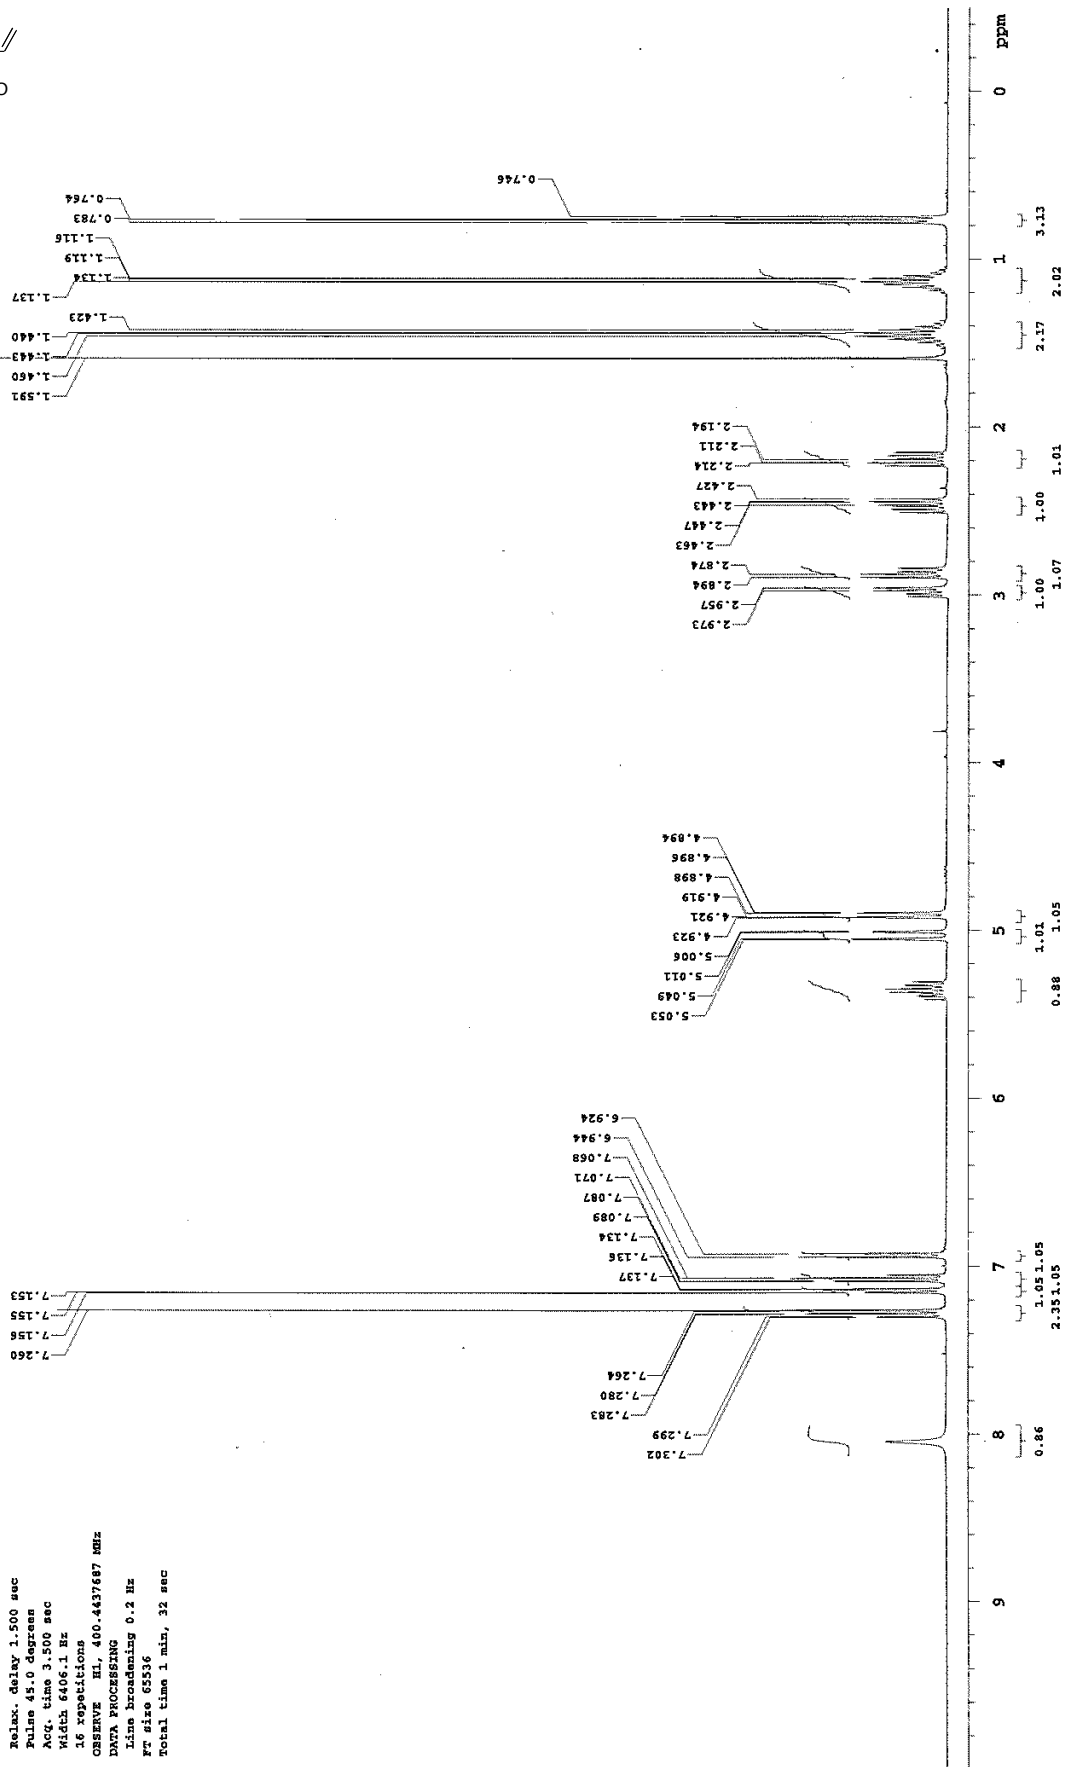

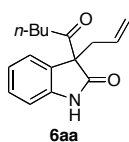

Relax. delay 1.158 sec  
Pulse 45.0 degrees  
Acq. time 0.842 sec  
Width 19000.0 Hz  
16000 repetitions  
OBSERVE C13, 75.4519671 MHz  
DECOUPLE H1, 500.0607335 MHz  
Power 37 dB  
continuously on  
WALTZ-16 modulated  
DATA PROCESSING  
Line broadening 1.0 Hz  
FT size 32768  
Total time 601 hr, 21 min, 17 sec

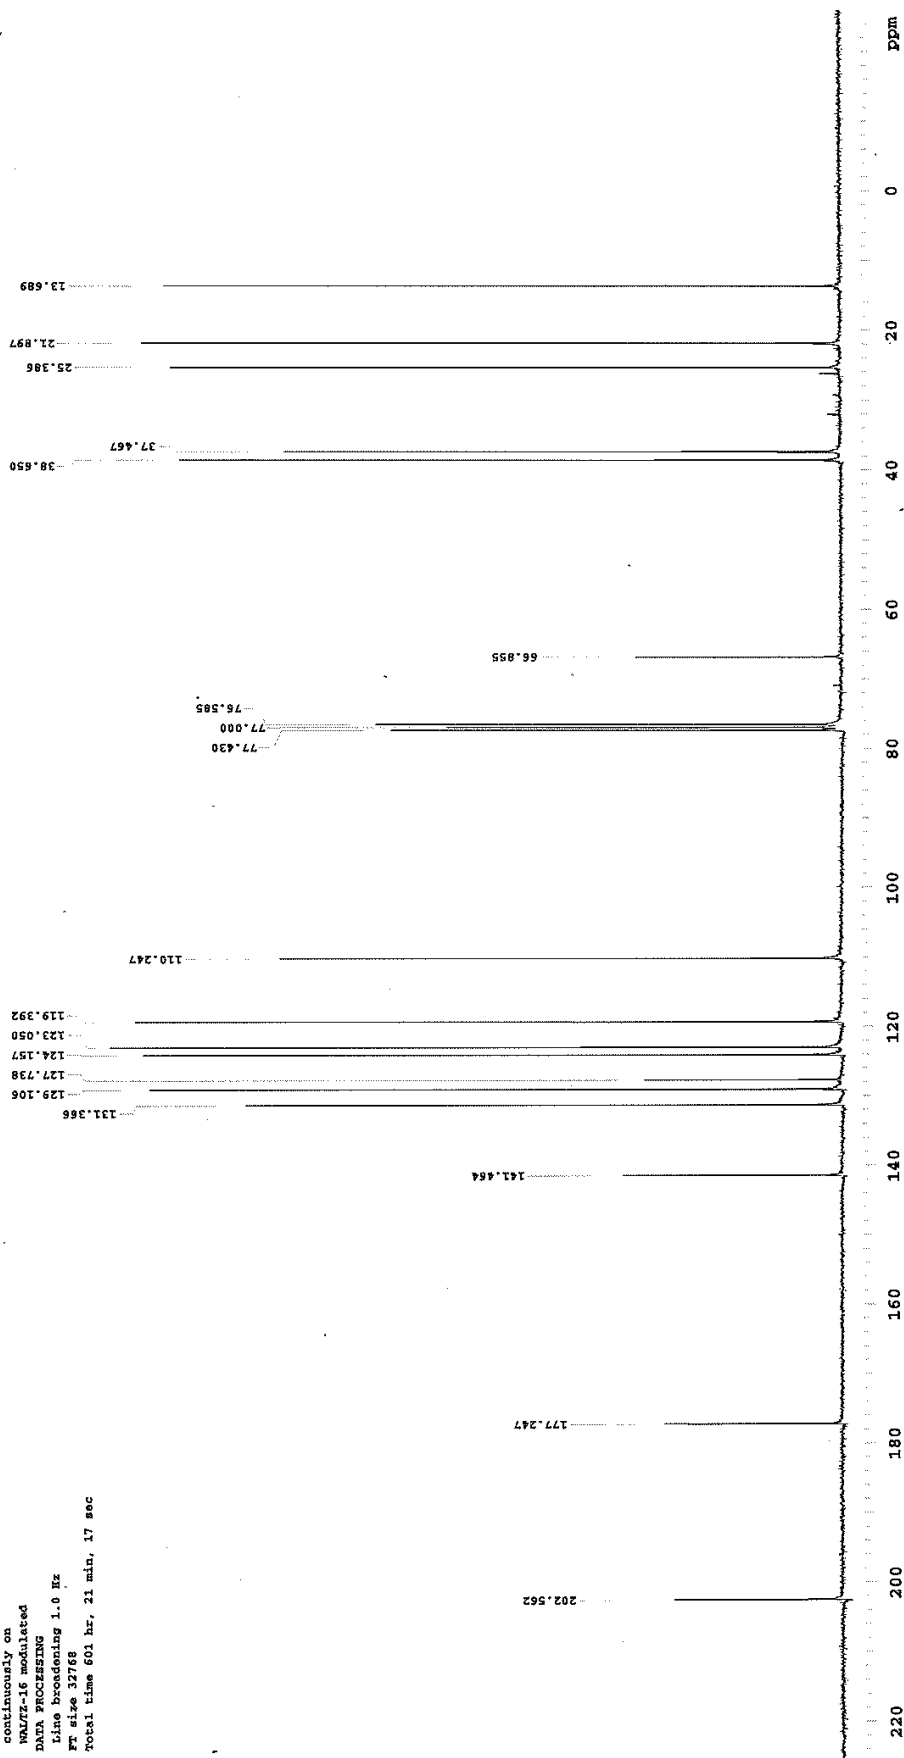

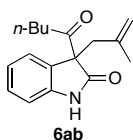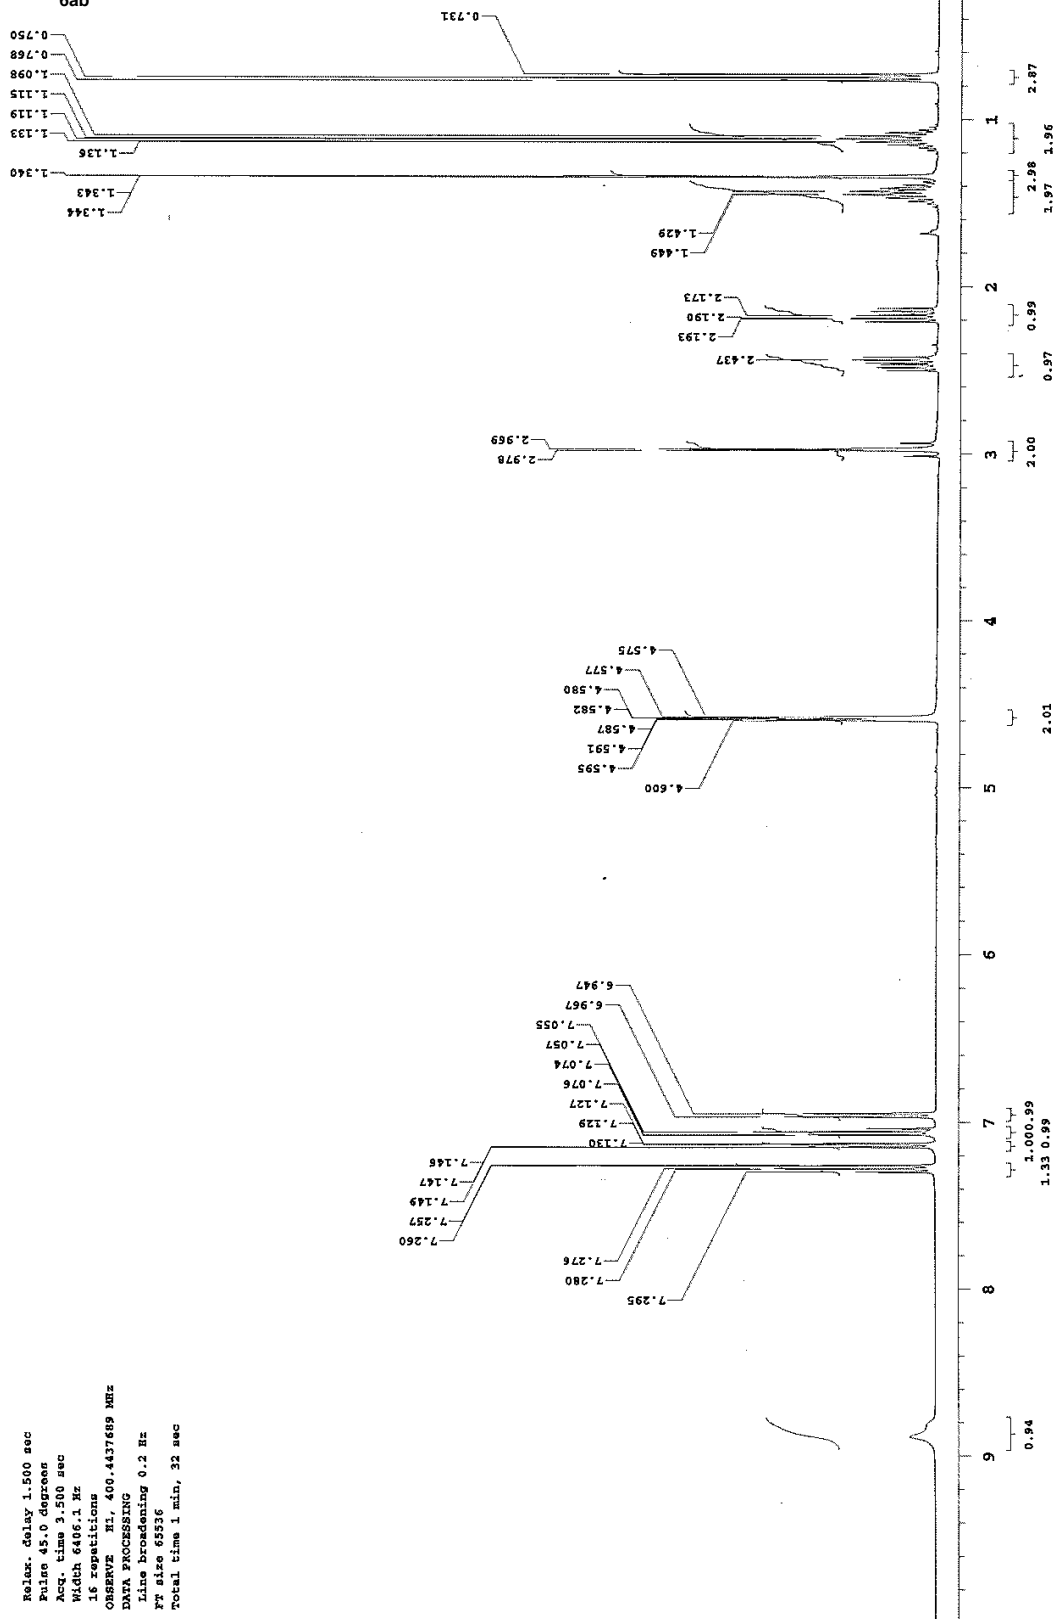

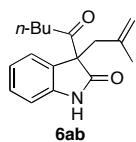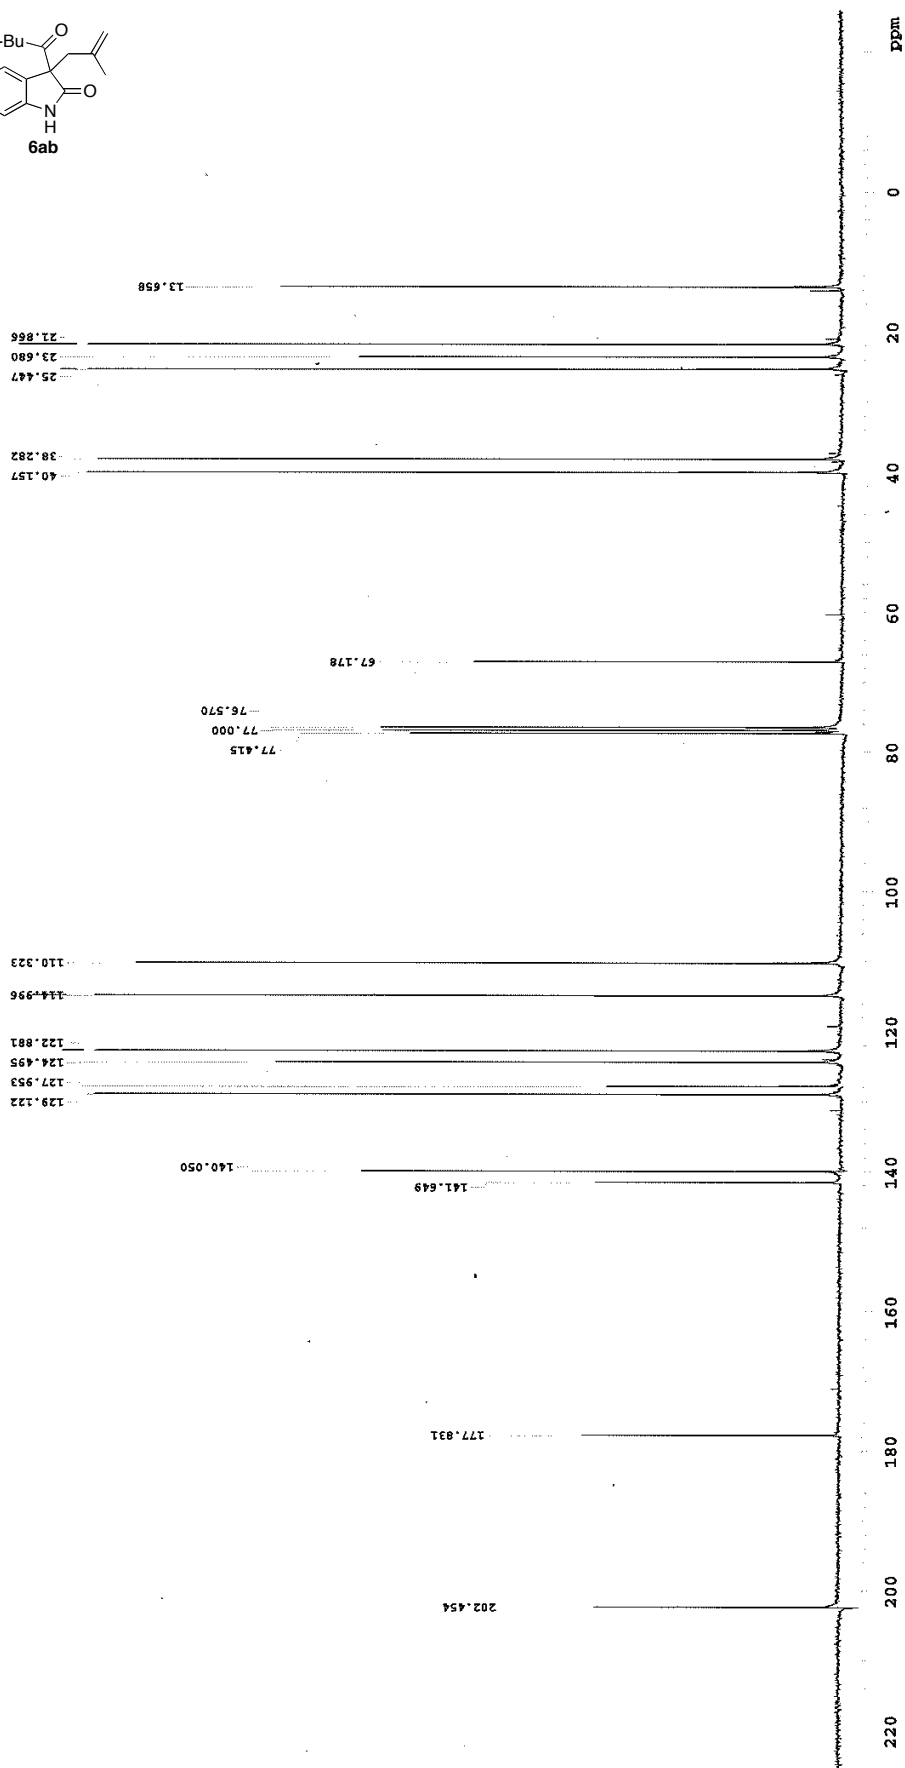



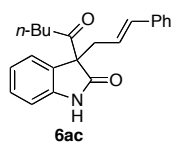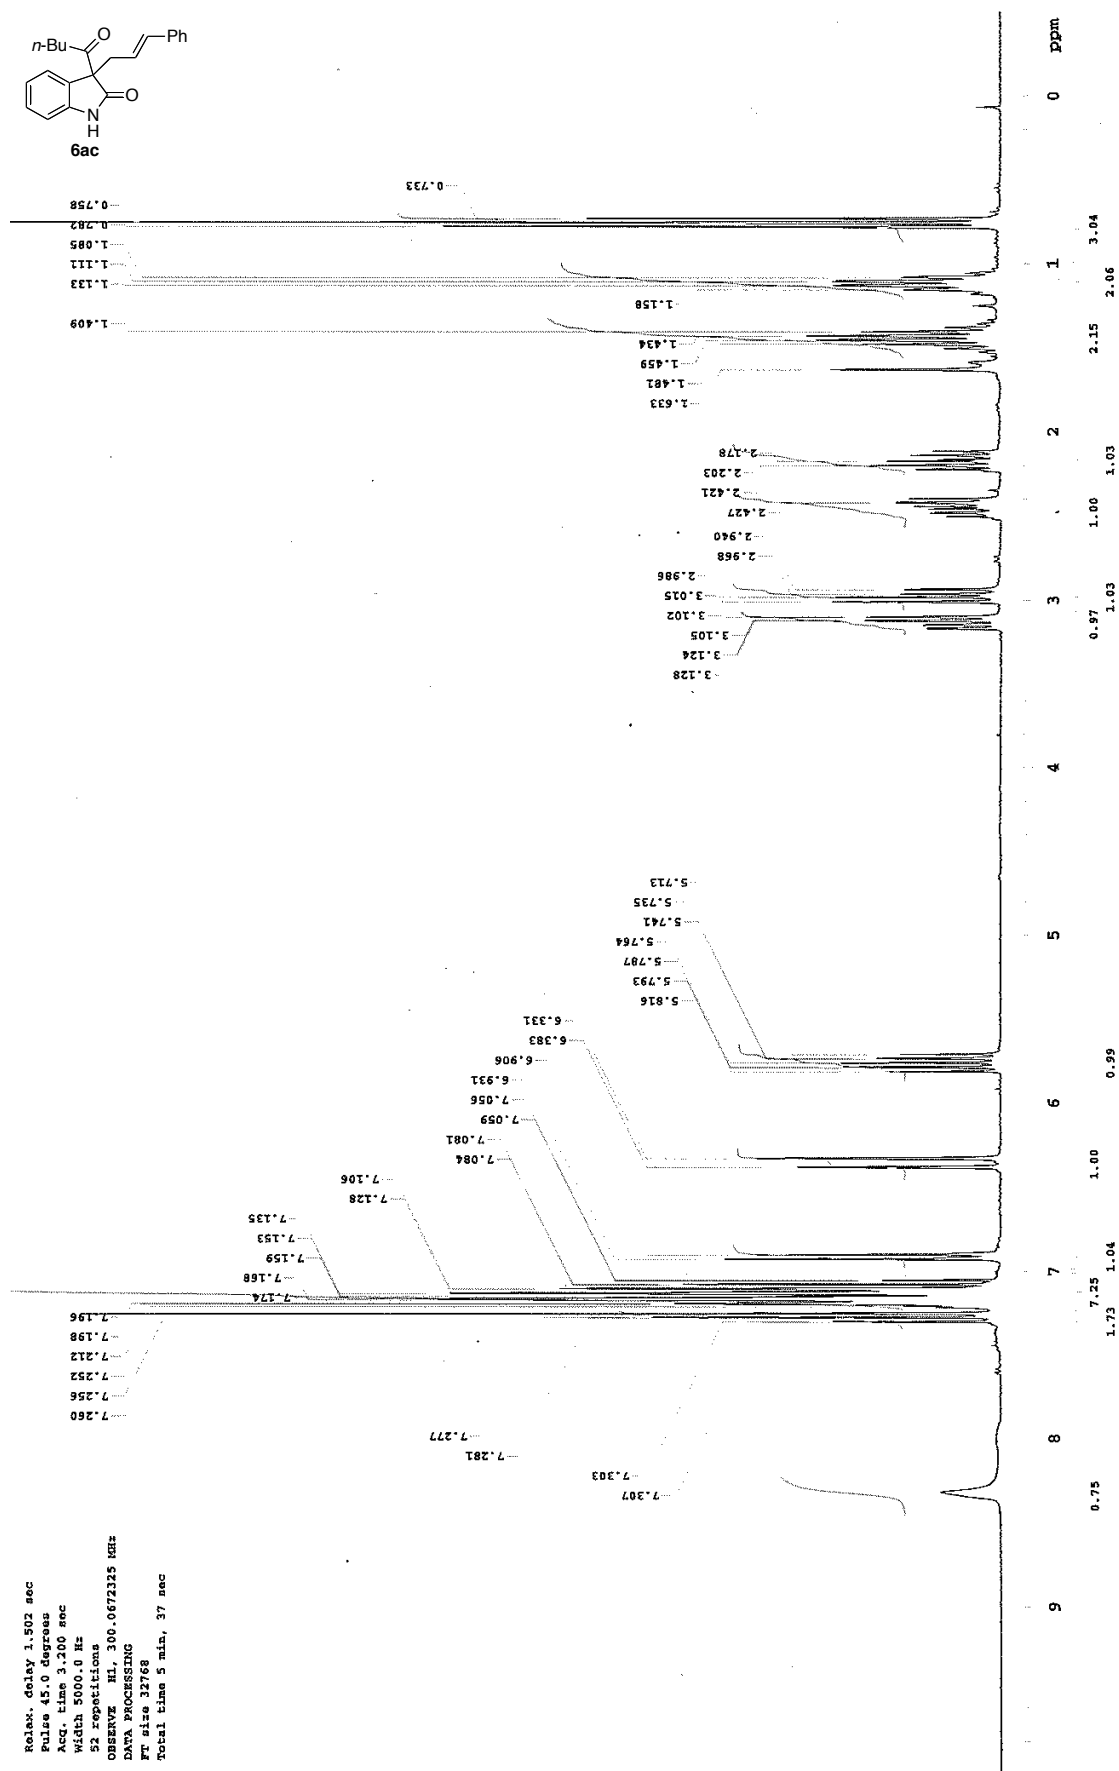

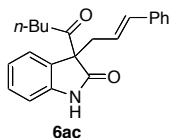

Pulse Sequence: zgpg30  
 Solvent: CDCl<sub>3</sub>  
 Ambient temperature  
 GEMINI-300B "varian2"  
 Relax. delay 1.138 sec  
 Pulse 45.0 degrees  
 Acq. time 0.842 sec  
 Width 19000.0 Hz  
 5072 repetitions  
 OBSERVE C13, 75.4519686 MHz  
 DECOUPLE H1, 300.0687335 MHz  
 Power 37 dB  
 continuously on  
 WALTZ-16 modulated  
 DATA PROCESSING  
 Line broadening 1.0 Hz  
 FT size 32768  
 Total time 60 hr, 8 min, 7 sec

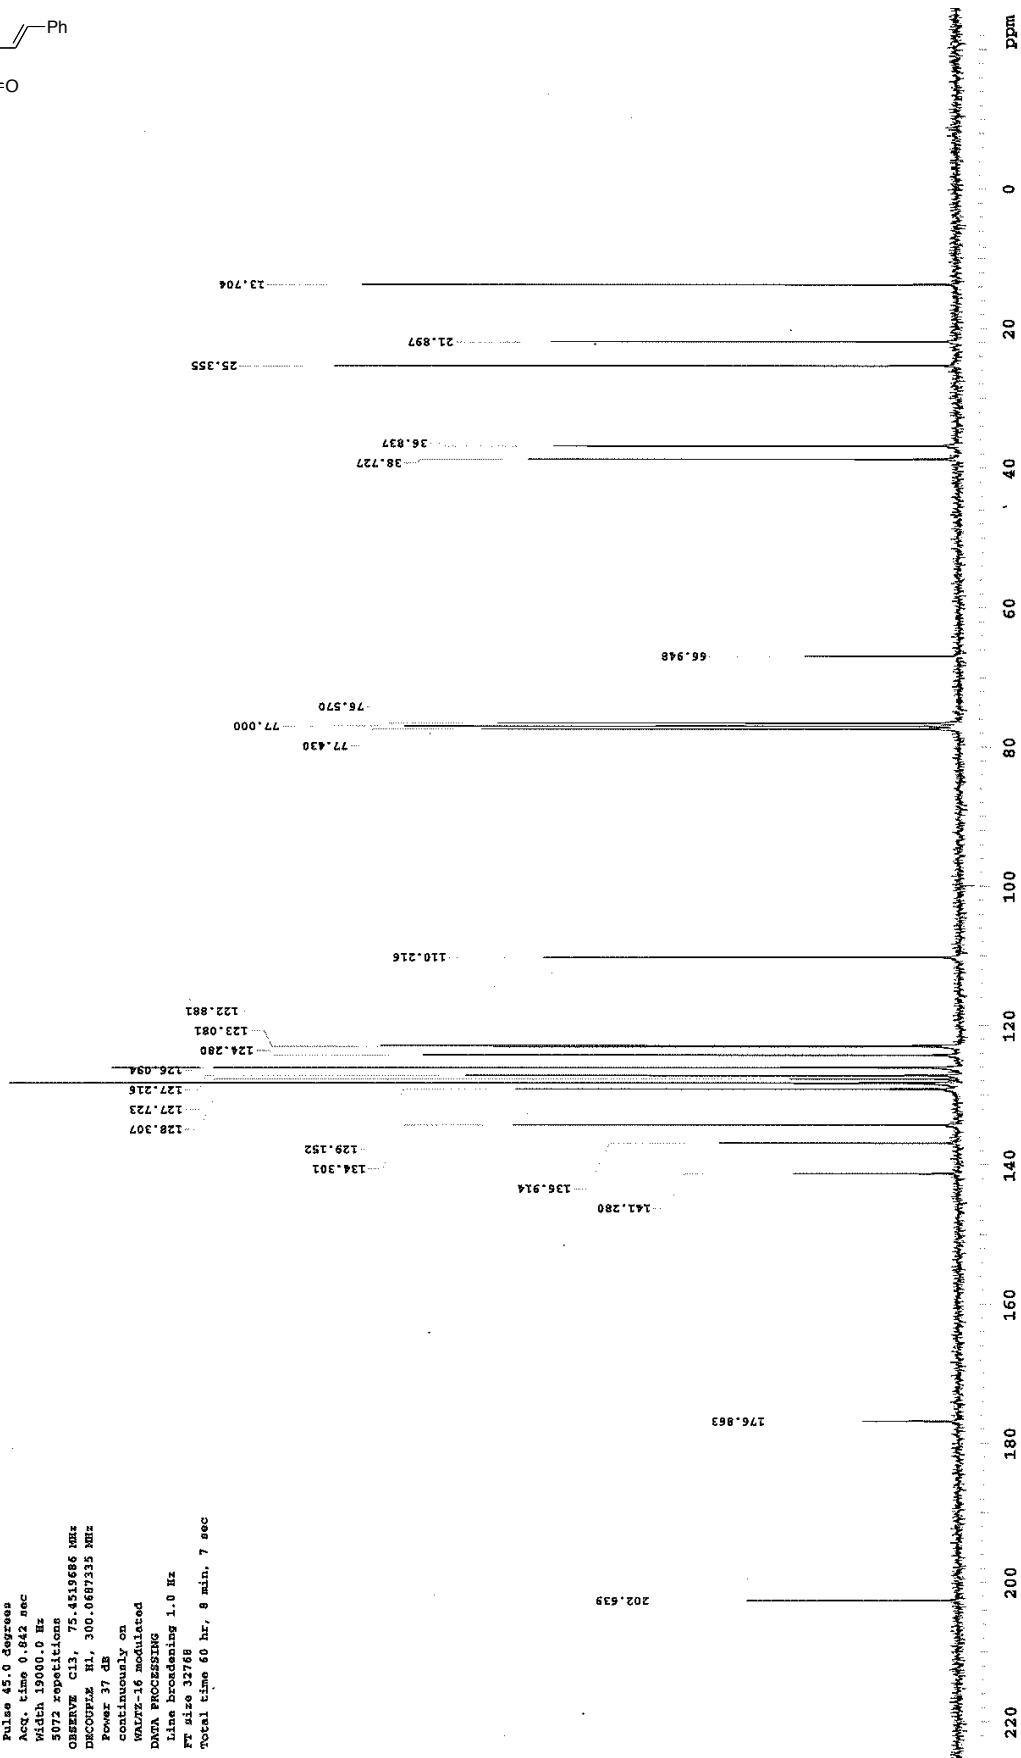

Relax. delay 1.500 sec  
Pulse 45.0 degrees  
Acq. time 3.500 sec  
Width 6406.1 Hz  
16 repetitions  
OBSERVE F1, 400.1437683 MHz  
DATA PROCESSING  
Line broadening 0.2 Hz  
FT size 65536  
Total time 1 min, 32 sec

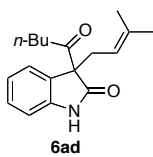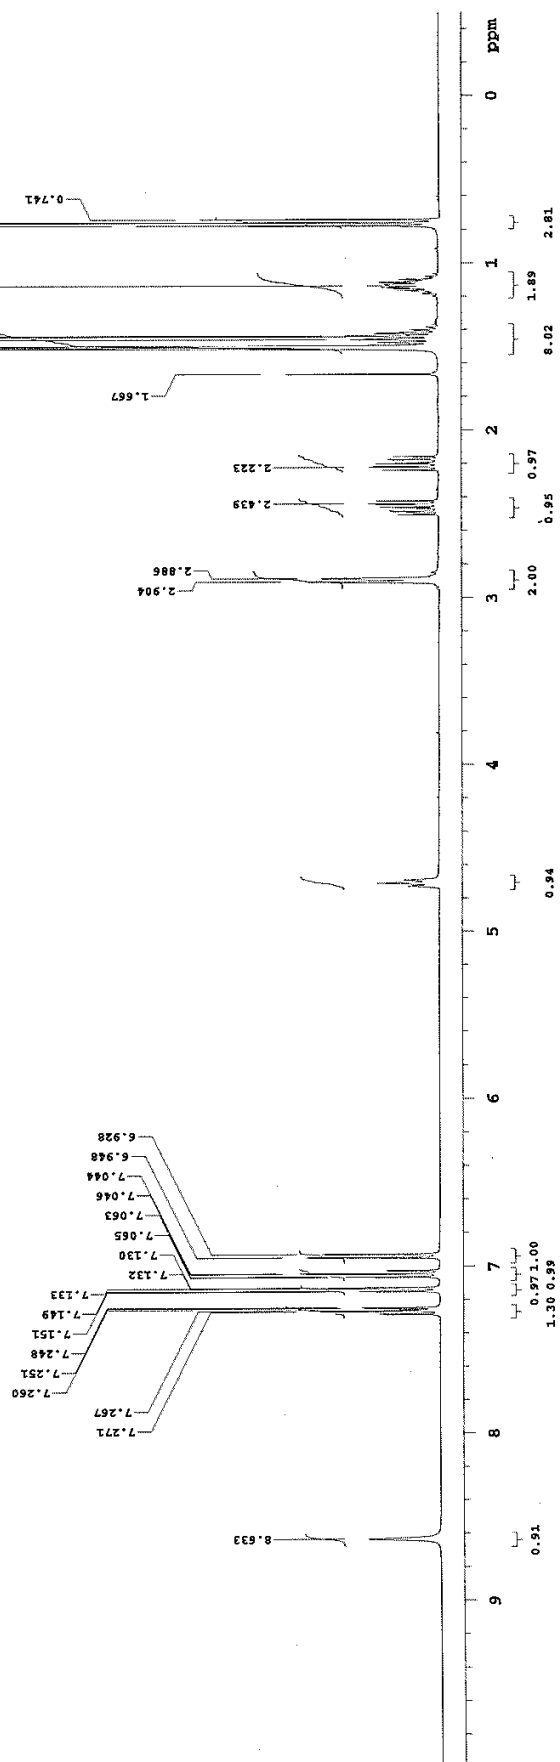

Pulse Sequence: zgpg30  
 Solvent: CDCl<sub>3</sub>  
 Ambient Temperature  
 GEMINI-300MH "Varian2"  
 Relax. delay: 1.156 sec  
 Pulse: 45.0 degrees  
 Acq. time: 0.542 sec  
 Width: 15000.0 Hz  
 14512 repetitions  
 OBSERVE: C13, 75.4515666 MHz  
 DECOUPLE: H1, 300.0697335 MHz  
 Power: 37 dB  
 continuously on  
 WALTZ-16 Modulated  
 DATA PROCESSING  
 Line broadening: 1.0 Hz  
 FT size: 32768  
 Total time: 60 hr, 8 min, 7 sec

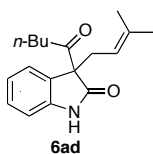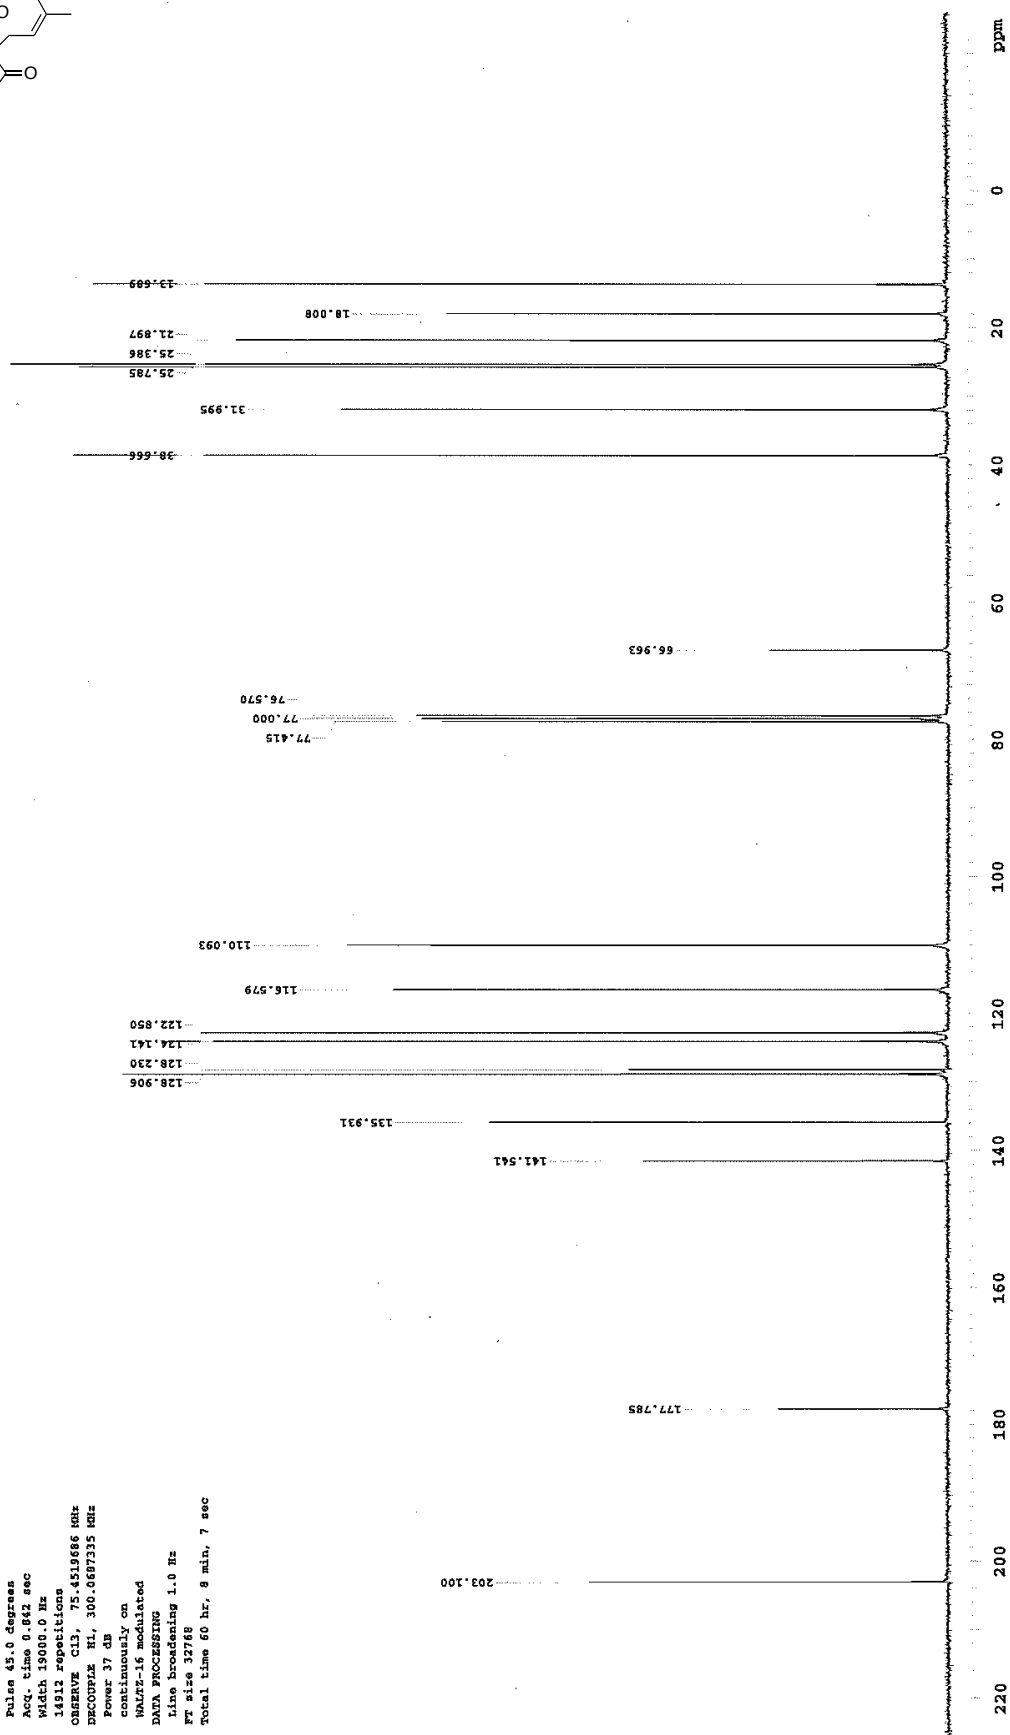

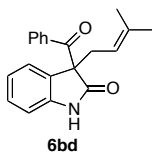

Relax. delay 1.500 sec  
Pulse 45.0 degrees  
Acq. time 3.500 sec  
Width 6406.1 Hz  
16 repetitions  
OBSERVE F1, 400.4437687 MHz  
DATA PROCESSING  
Line broadening 0.2 Hz  
FT size 65536  
Total time 1 min, 32 sec

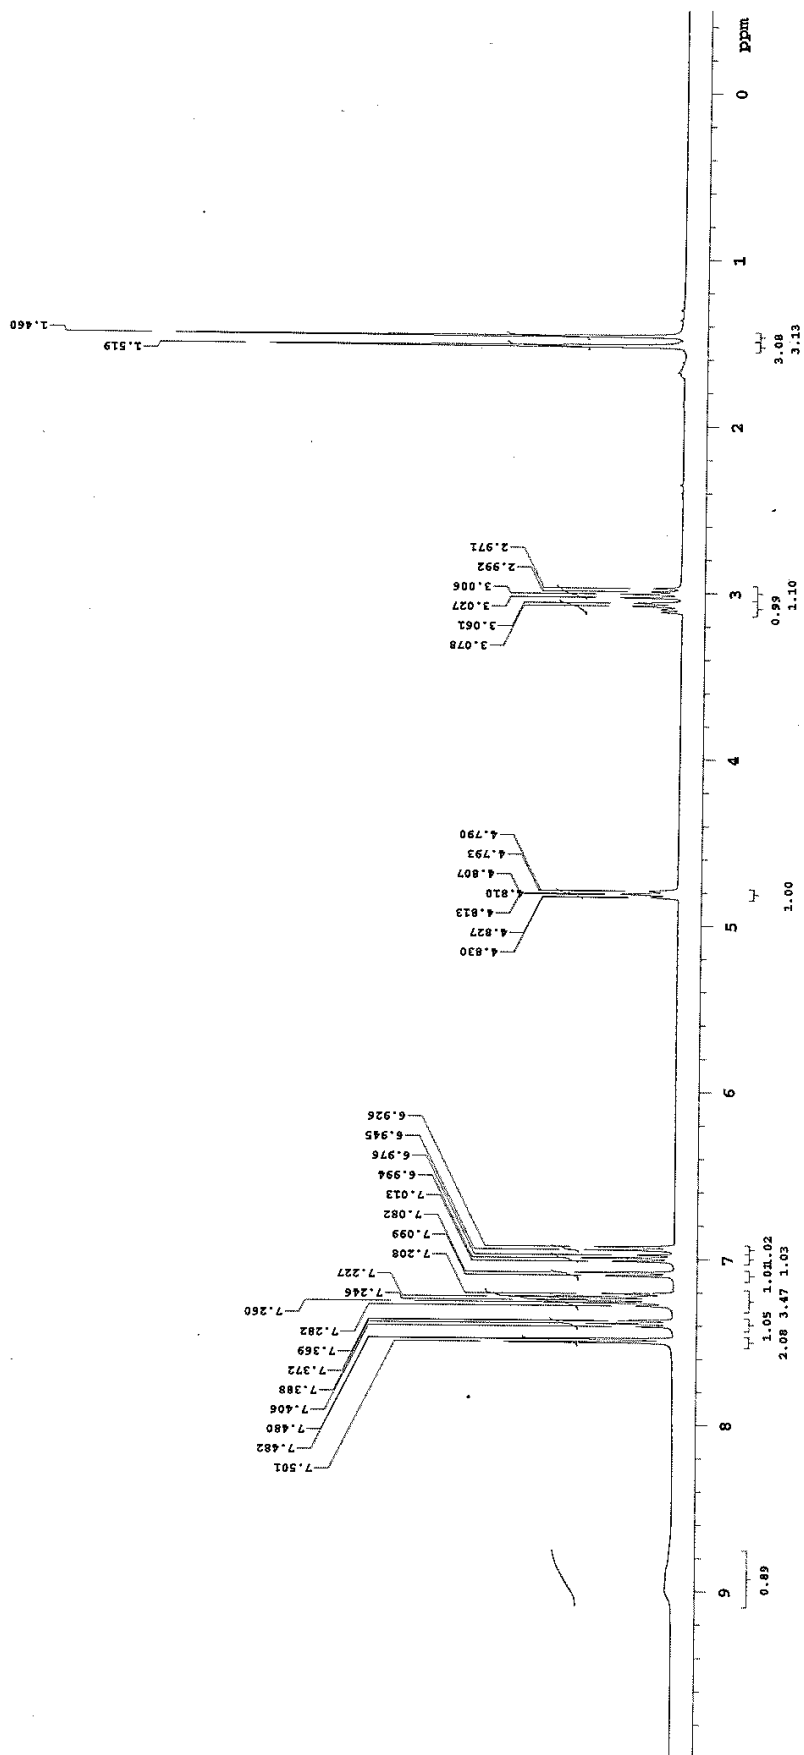

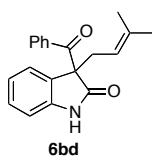

Pulse Sequence: s2pul  
 Solvent: cdcl3  
 Ambient temperature  
 Operator: vmml  
 File: Oxindole\_Pd\_pronyl\_13c  
 Mercury-400NB "Varian-MN"  
 Relax delay 0.700 sec  
 Pulse 45.0 degrees  
 Acq. time 1.300 sec  
 Width 24154.0 Hz  
 5104 repetitions  
 OBSERVE CH, 100.6316702 MHz  
 DECOUPLE N1, 400.4458059 MHz  
 Power 40 dB  
 continuously on  
 WALTZ-16 modulated  
 DATA PROCESSING  
 Line broadening 1.0 Hz  
 FT size 6536  
 Total time 5 hr, 58 min, 59 sec

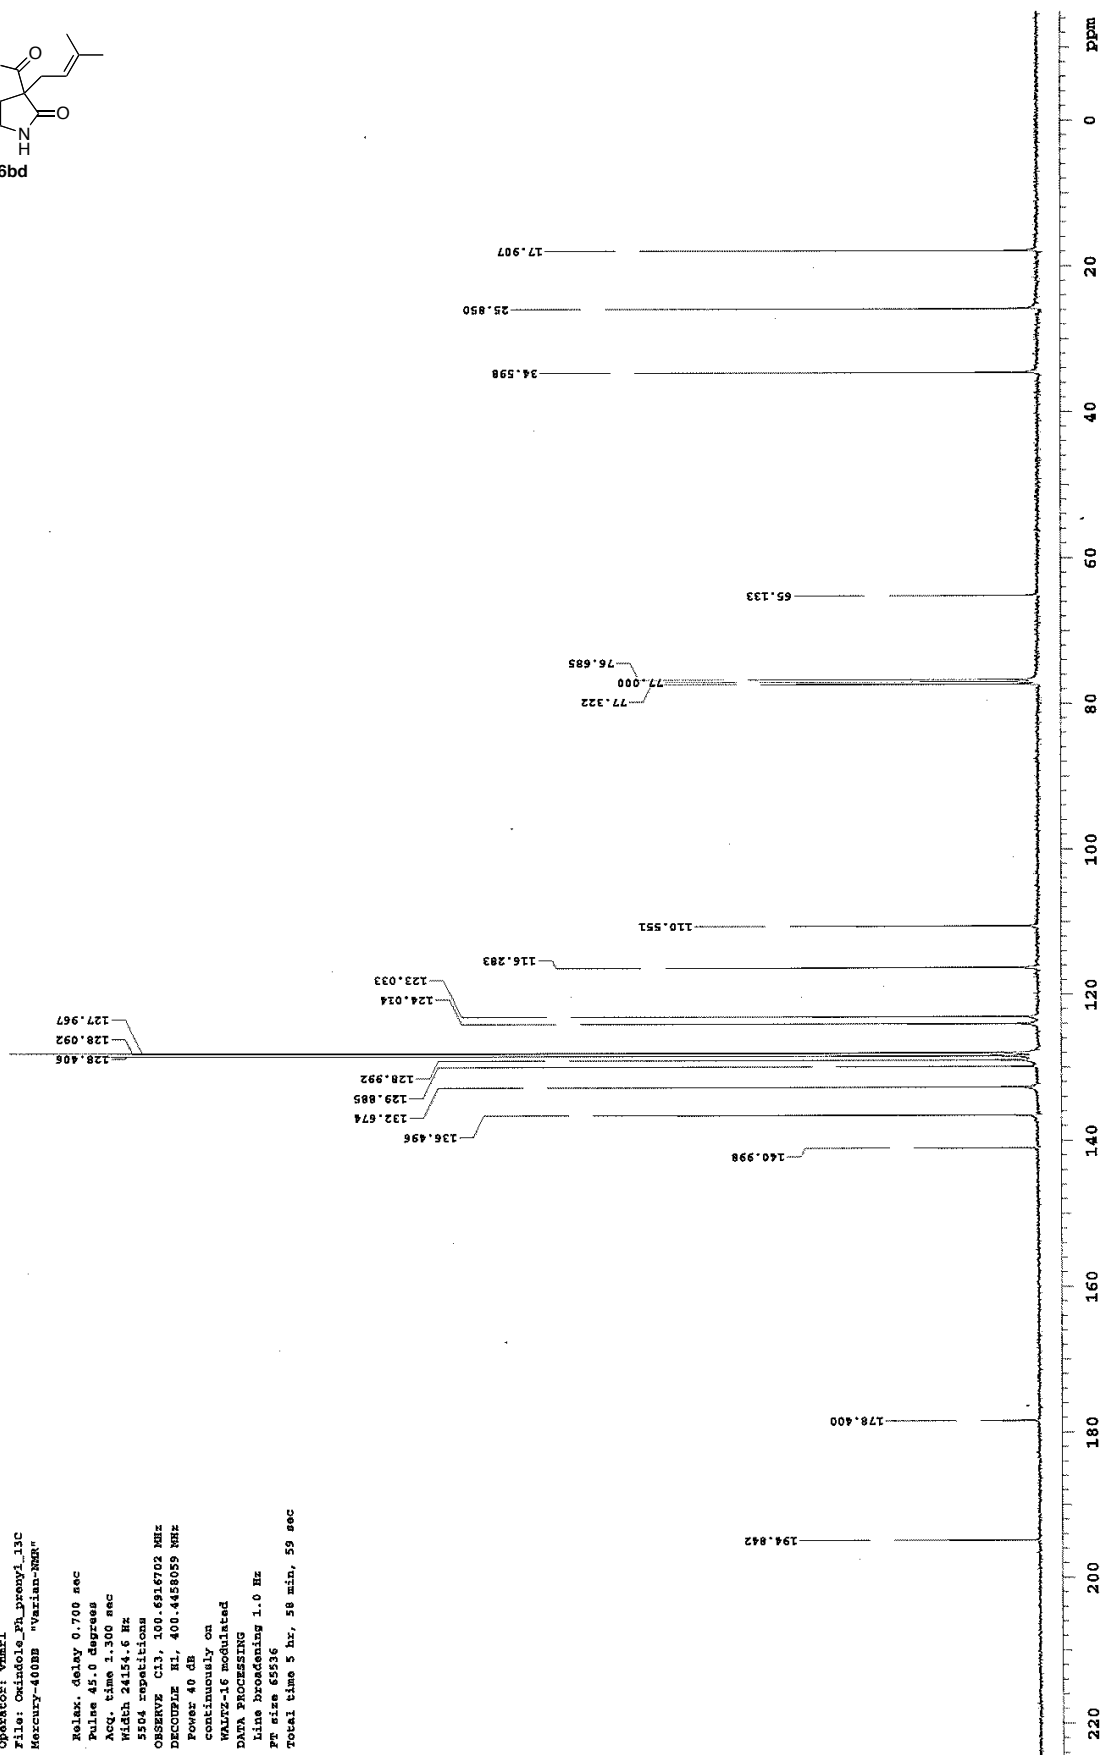

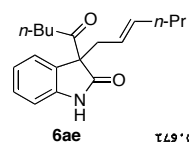

0.671  
 0.686  
 0.736  
 0.761  
 1.103  
 1.105

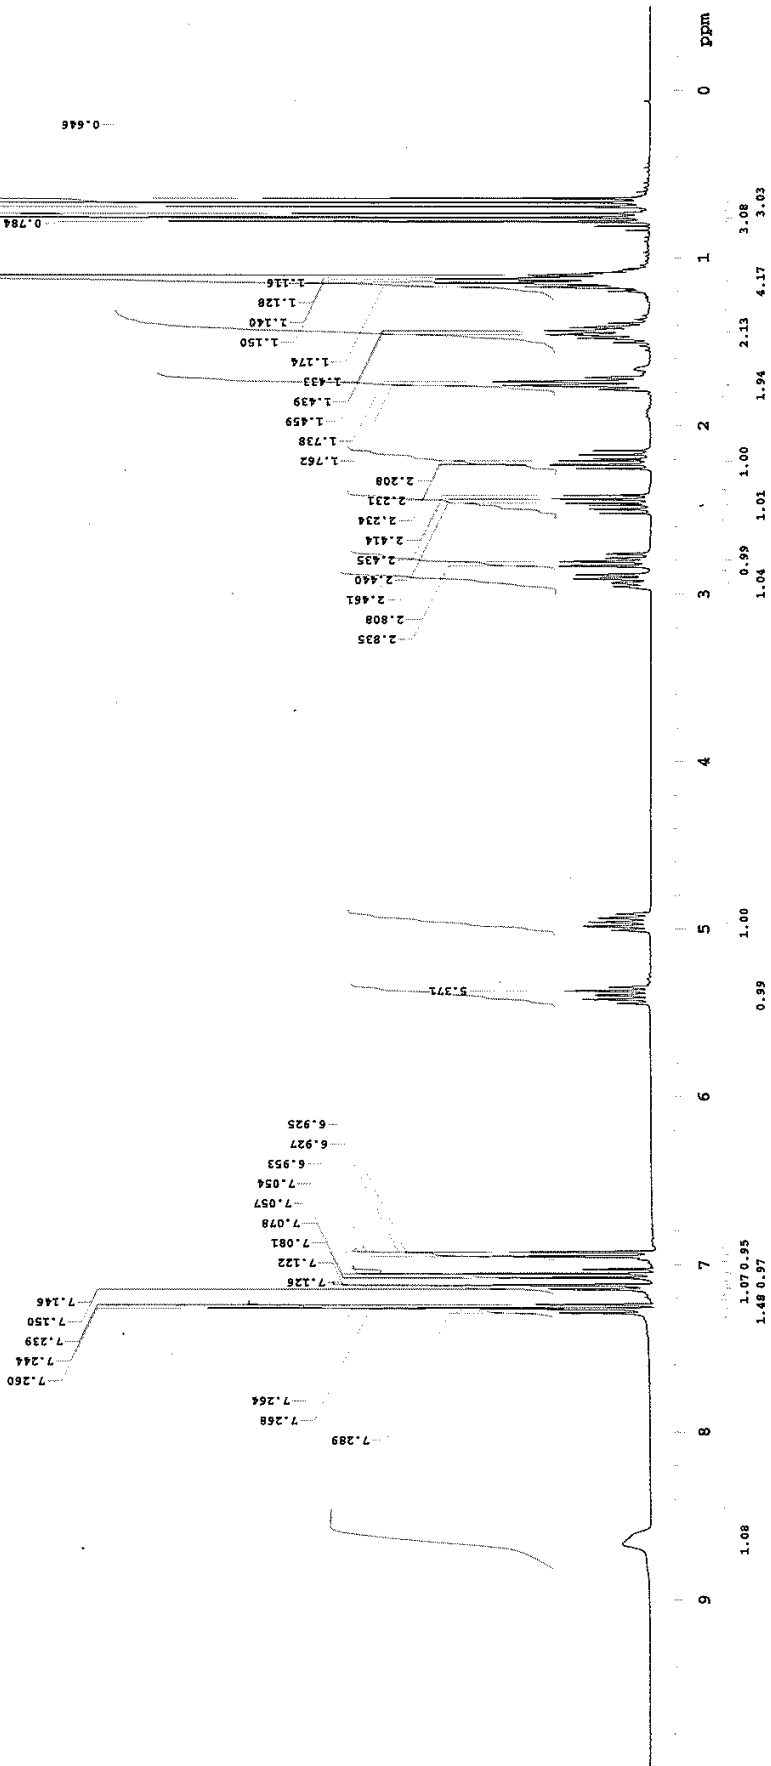

Pulse Sequence: #2pul  
 Solvent: CDCl3  
 Ambient temperature  
 GEMINI-300NB "varian2"  
 Relax: delay 1.502 sec  
 Pulse 45.0 degrees  
 Acq. time 3.200 sec  
 Width 5000.0 Hz  
 48 repetitions  
 OBSERVE HL 300.0672325 MHz  
 DATA PROCESSING  
 FT size 32768  
 Total time 5 min, 37 sec

Pulse Sequence: s2pul  
 Solvent: cdcl3  
 Ambient temperature  
 Operator: vnmxl  
 Mercury-400B "Varian-NMR"  
 Relax. delay 0.700 sec  
 Pulse 45.0 degrees  
 Acq. time 1.300 sec  
 Width 24154.6 Hz  
 4496 repetitions  
 OBSERVE C13, 100.631672 MHz  
 DECOUPLE H1, 400.4458059 MHz  
 Power 40 dB  
 continuously on  
 WALTZ-16 modulated  
 DATA PROCESSING  
 Line broadening 1.0 Hz  
 FT size 65536  
 Total time 6 hr, 19 min, 25 sec

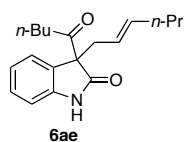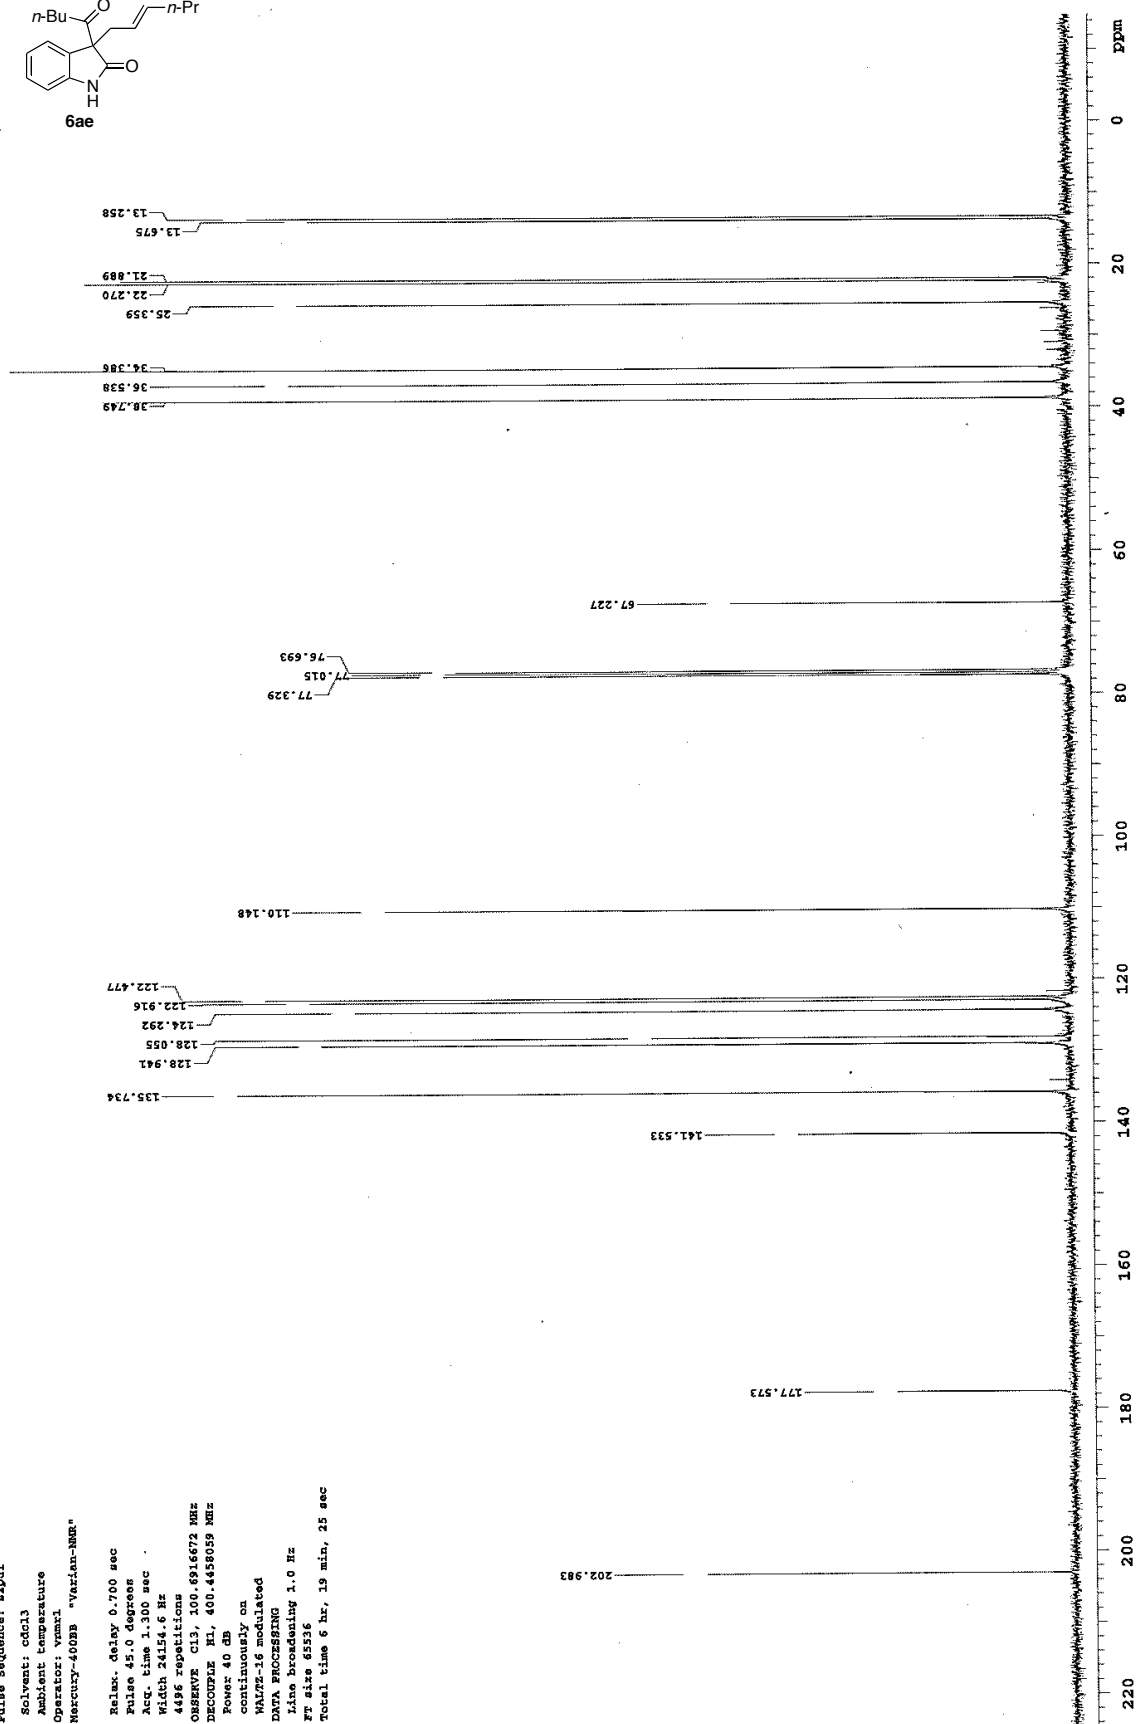



## STANDARD 1H OBSERVE

```

Pulse Sequence: s2pul
Solvent: CDCl3
Ambient Temperature
GEMINT-300BH "varian2"
Relax. delay 1.502 sec
Pulse 45.0 degrees
Acq. time 3.200 sec
Width 5000.0 Hz
16 repetitions
OBSERVE H1, 300.0672119 MHz
DATA PROCESSING
P1 size 32768
Total time 1 min, 24 sec

```

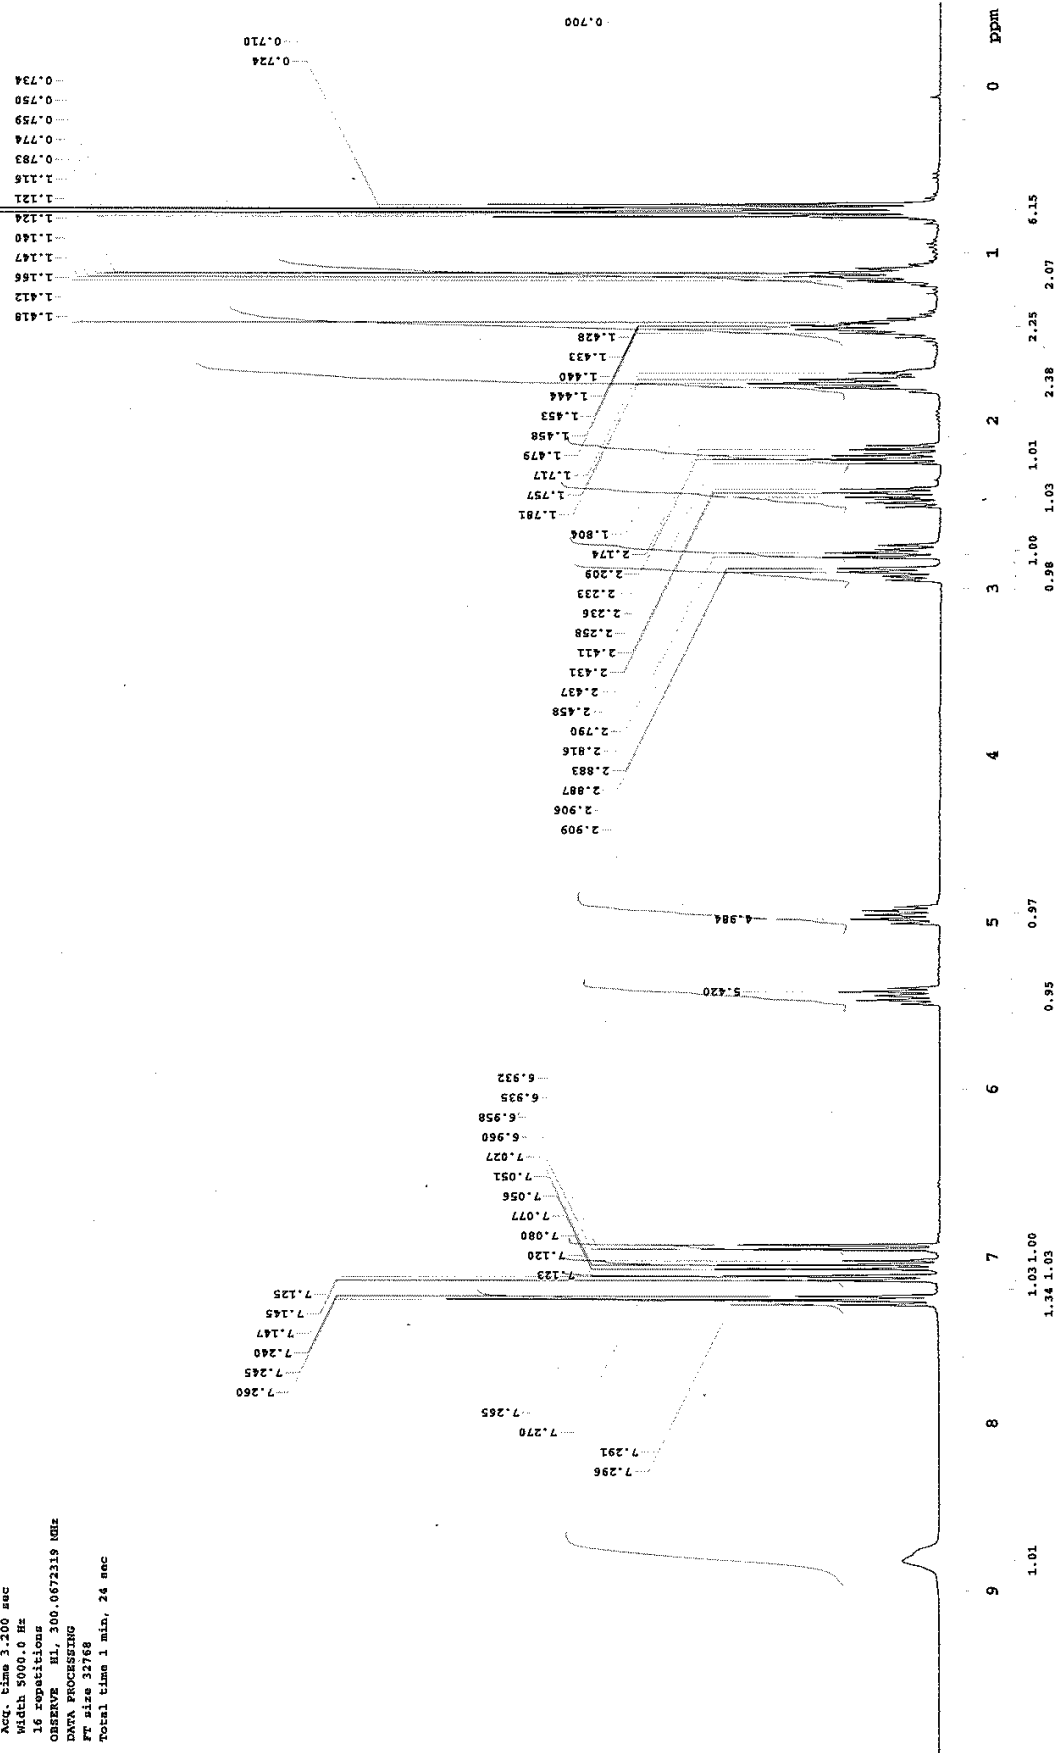

Pulse Sequence: s2pul  
 Solvent: cdcl3  
 Ambient temperature  
 Operator: vmarl  
 Mercury-400BB "Varian-NMR"  
 Relax. delay 0.700 sec  
 Pulse 45.0 degrees  
 Acq. time 1.300 sec  
 Width 24154.6 Hz  
 2496 repetitions  
 OBSERVE C13, 100.6316679 MHz  
 DECOUPLE H1, 400.4458059 MHz  
 Power 40 dB  
 continuously on  
 WALTZ-16 modulated  
 DATA PROCESSING  
 Line broadening 1.0 Hz  
 FT size 65536  
 Total time 5 hr, 58 min, 59 sec

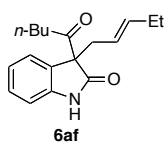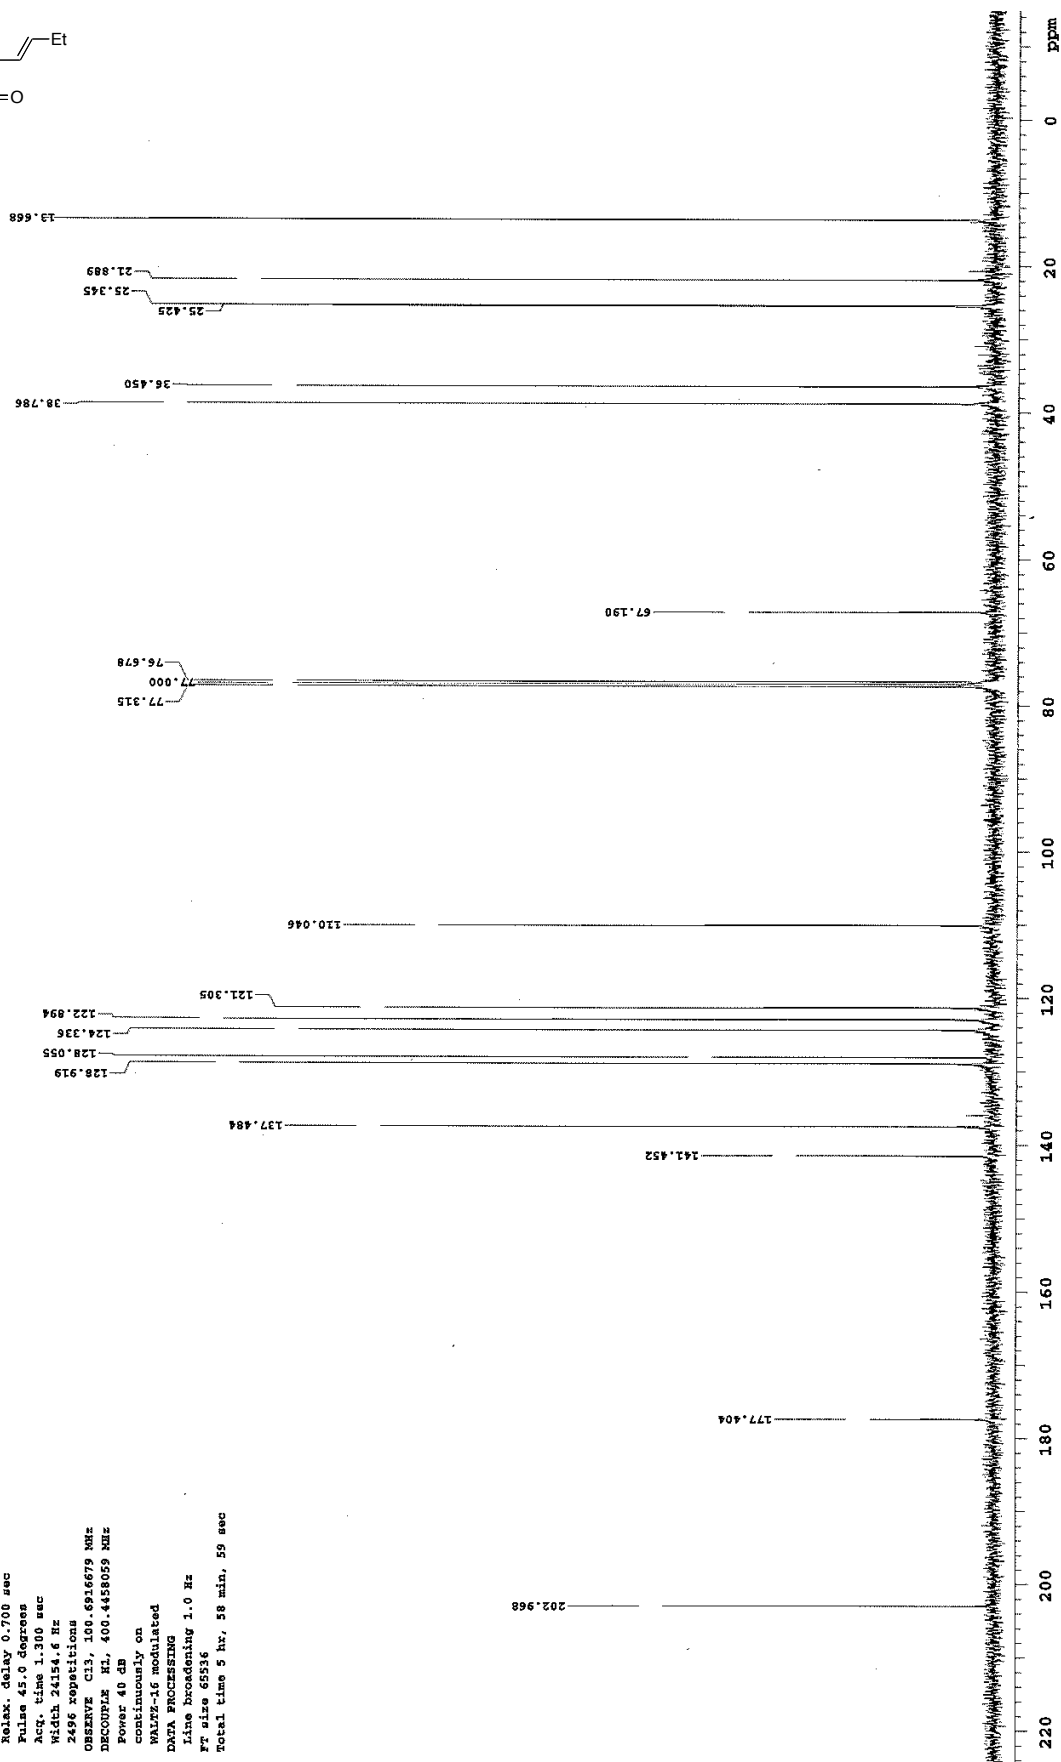

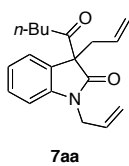

Pulse Sequence: zgpg30  
 Solvent: CDCl3  
 Ambient Temperature  
 GEMINI-300MHz "varian2"  
 Relax. delay 1.502 sec  
 Pulse 45.0 degrees  
 Acq. time 3.200 sec  
 Width 5000.0 Hz  
 16 repetitions  
 OBSERVE M1, 300.0672325 MHz  
 DATA PROCESSING  
 FT size 32768  
 Total time 1 min, 24 sec

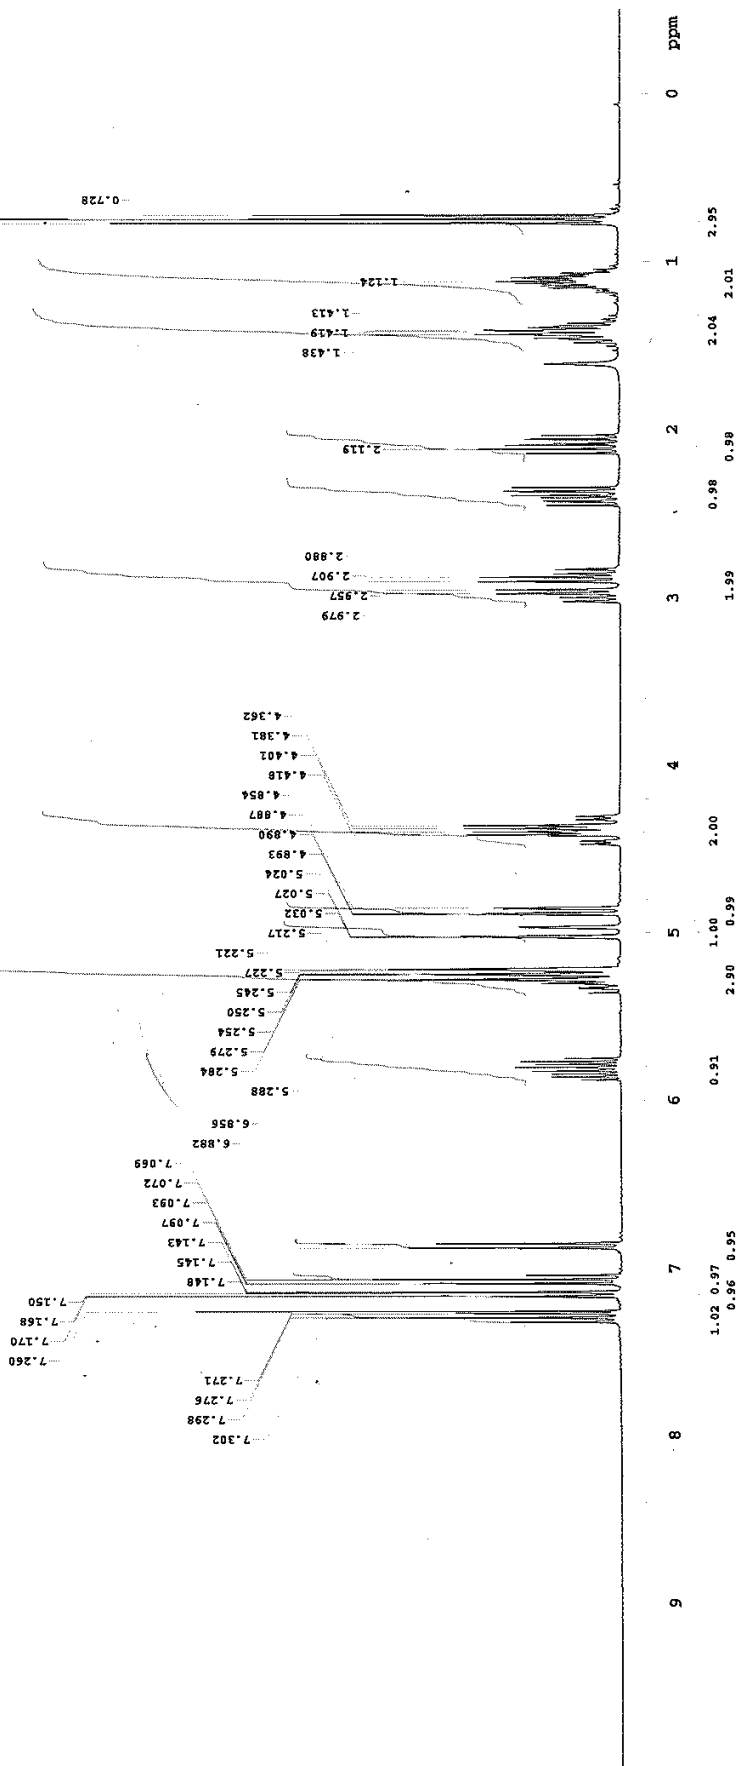

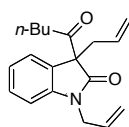

7aa

Pulse Sequence: s2pul  
 Solvent: cdcl3  
 Ambient temperature  
 Operator: vmm1  
 Mercury-400NB "Varian-MMR"  
 Relax delay 0.700 sec  
 Pulse 45.0 degrees  
 Acq time 2.000 sec  
 Width 24154.4 Hz  
 3272 repetitions  
 OBSERVE C13, 100.621607 MHz  
 DECOUPLE H1, 400.445059 MHz  
 Power 40 dB  
 continuously on  
 WAIT2-16 modulated  
 DATA PROCESSING  
 Line broadening 1.0 Hz  
 F1 size 65536  
 Total time 5 hr, 58 min, 59 sec

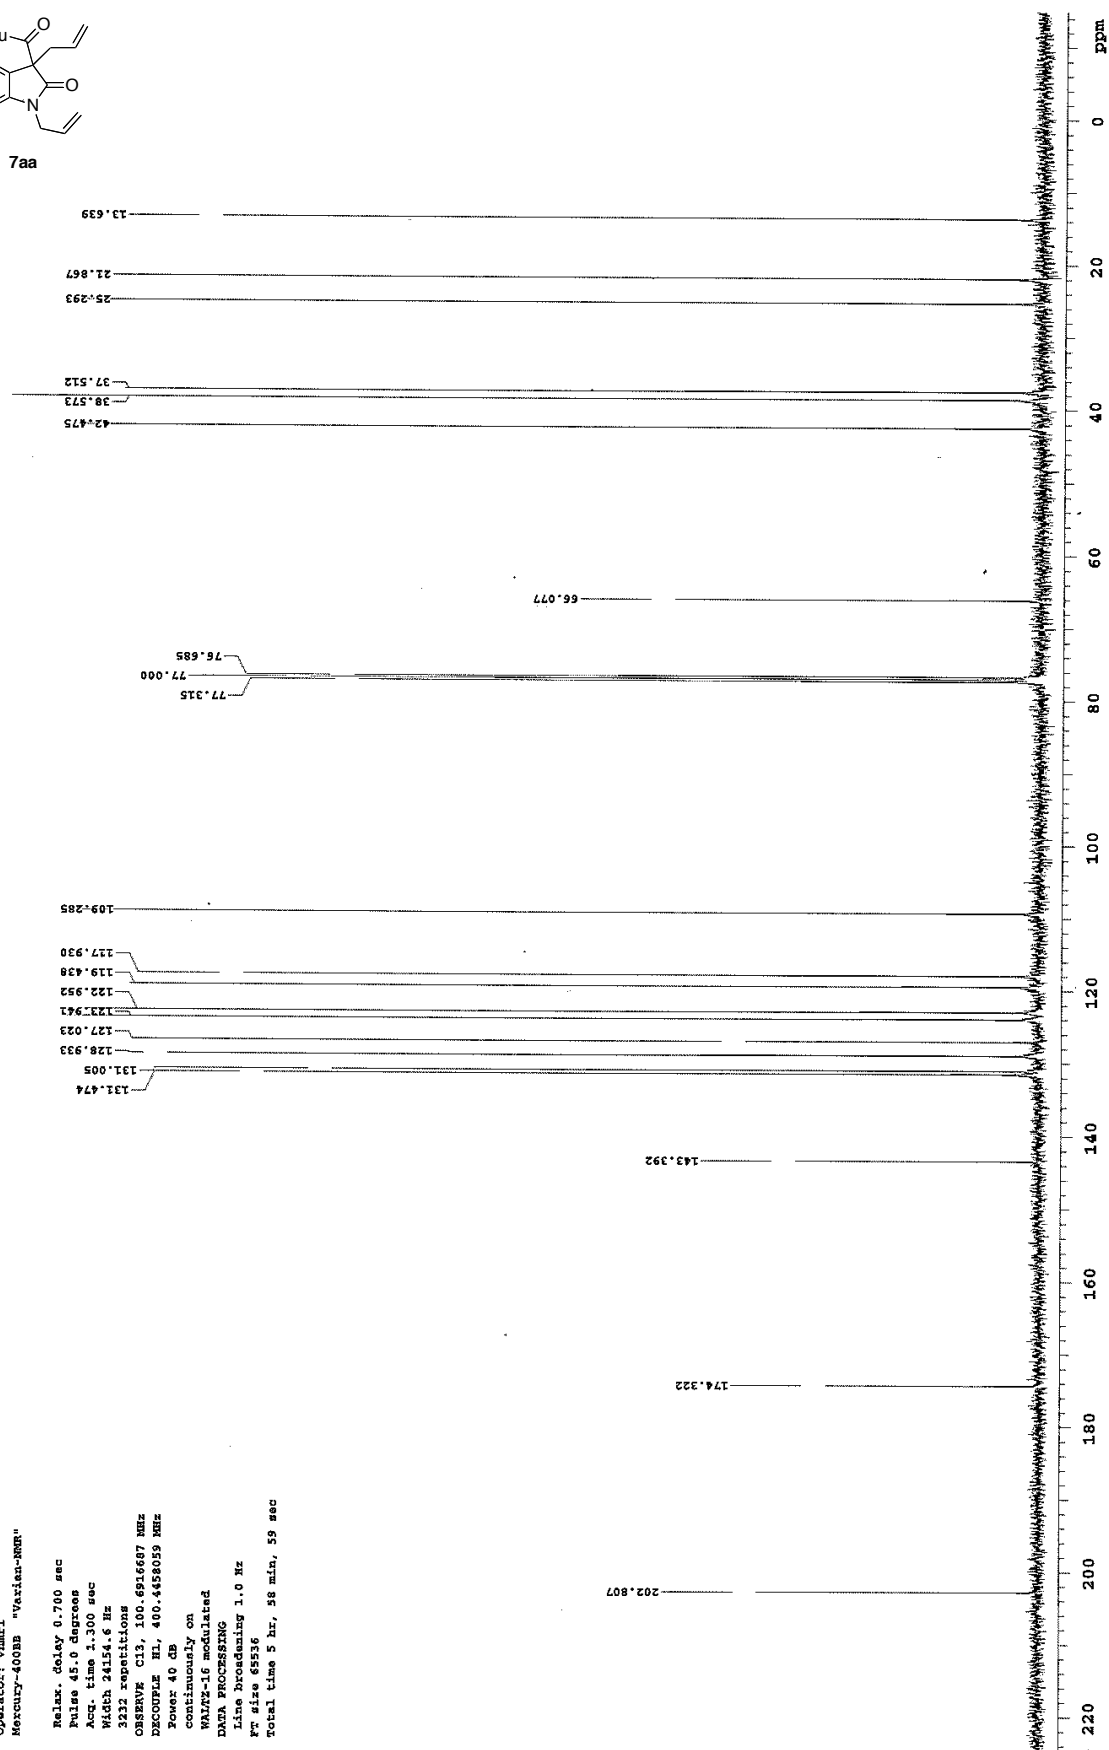

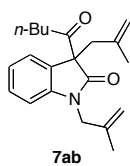

Pulse Sequence: s2pul  
 Solvent: cdcl3  
 Ambient temperature  
 Operator: vnmxl  
 Mercury-400DB "Varian-NMR"  
 Relax. delay 1.500 sec  
 Pulse 45.0 degrees  
 Acq. time 3.500 sec  
 Width 6406.1 Hz  
 16 repetitions  
 OBSERVE H1, 400.4437687 MHz  
 DATA PROCESSING  
 Line broadening 0.2 Hz  
 FT size 65536  
 Total time 1 min, 32 sec

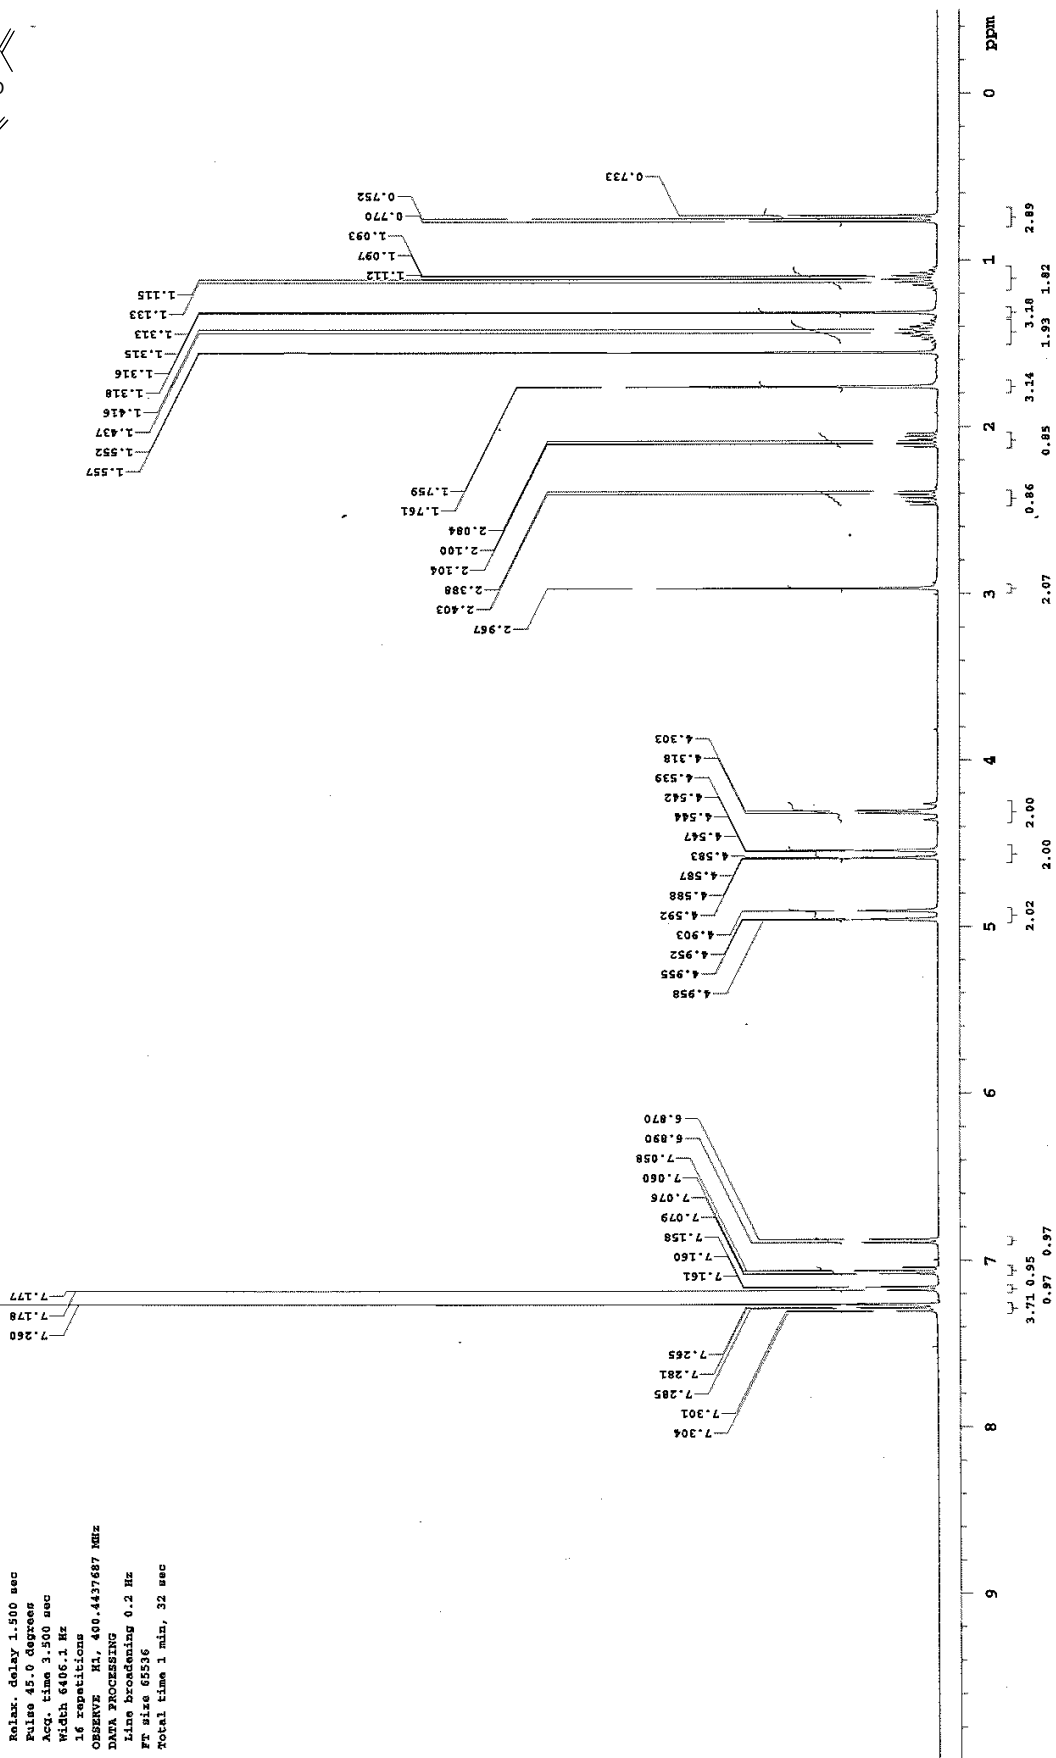

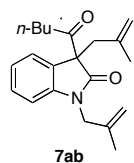

Solvent: cdcl3  
 Ambient temperature  
 Operator: vmm1  
 Mercury-400B "Varian-NMR"  
 Relax. delay 0.700 sec  
 Pulse 45.0 degrees  
 Acq. time 1.300 sec  
 Width 24154.6 Hz  
 16128 repetitions  
 OBSERVE C13, 100.6916594 MHz  
 DECOUPLE H1, 400.4458055 MHz  
 Power 40 db  
 Continuously on  
 WALTZ-16 modulated  
 DATA PROCESSING  
 Line broadening 1.0 Hz  
 FT size 65536  
 Total time 581 hr, 10 min, 52 sec

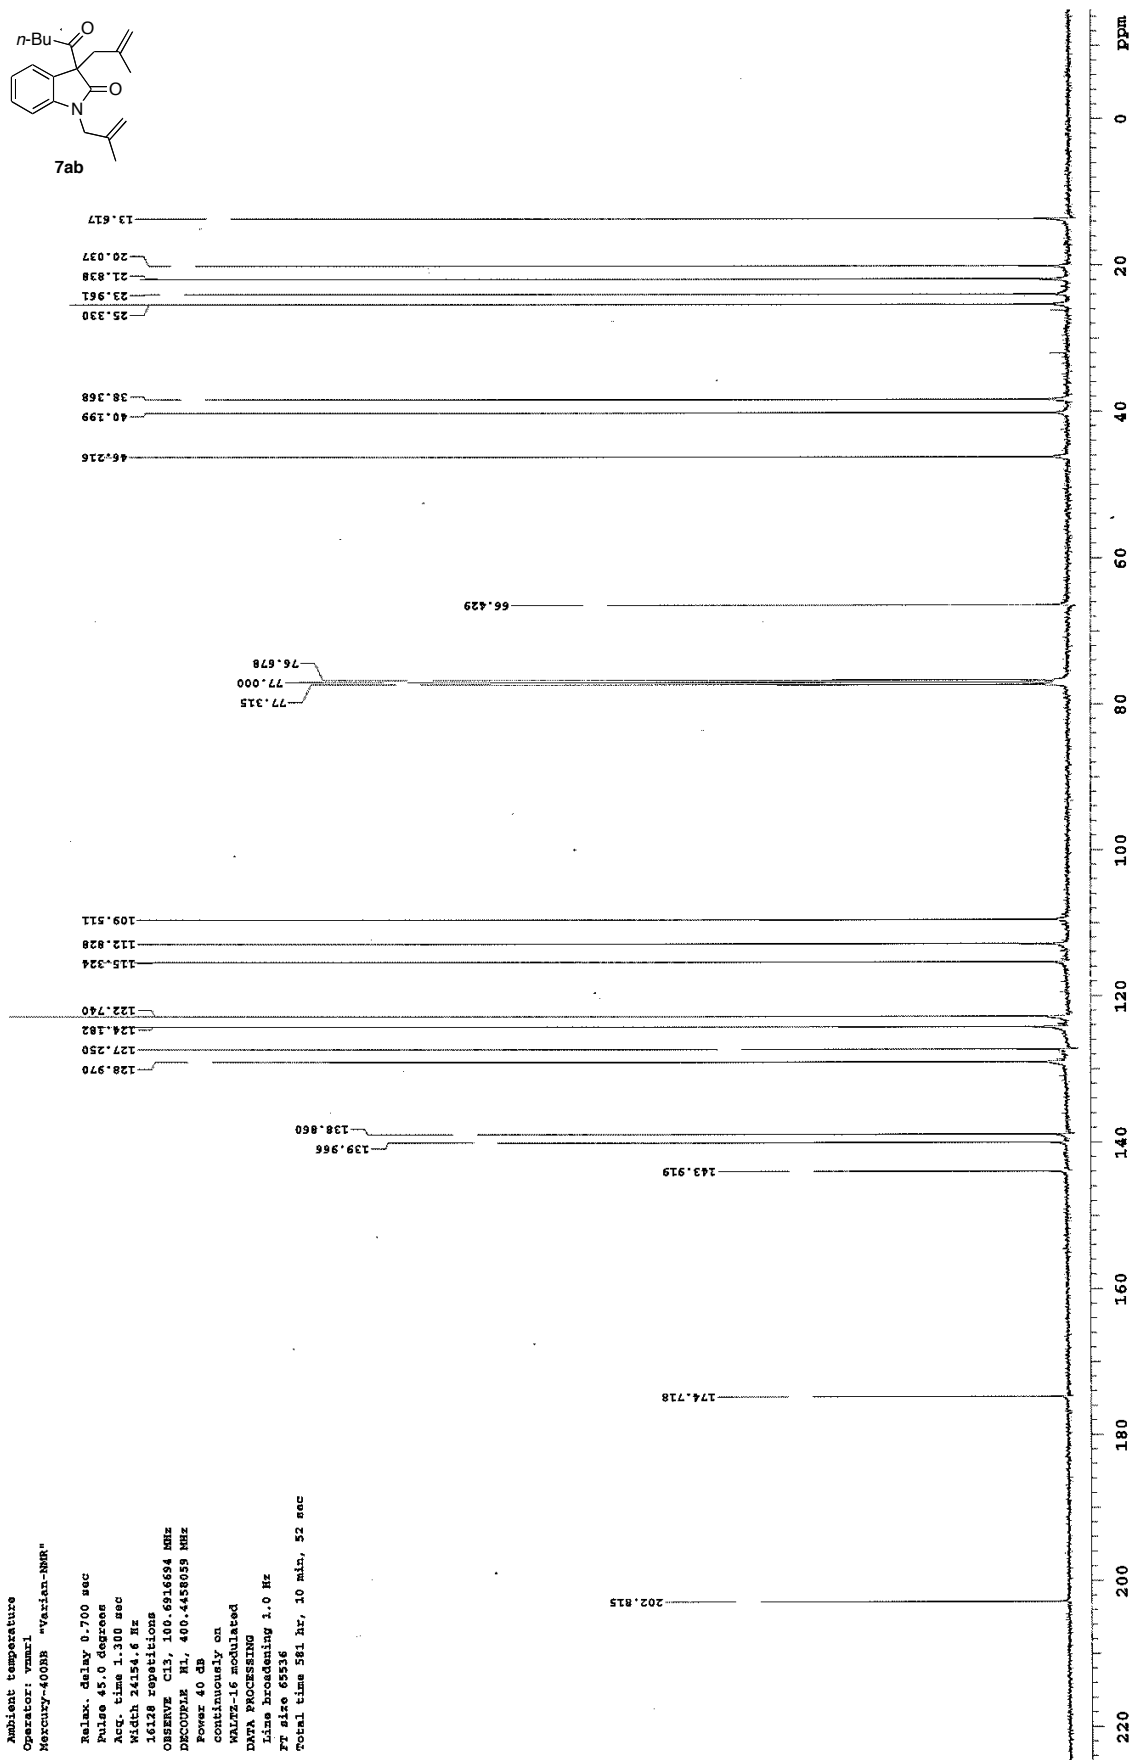

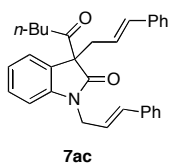

Pulse Sequence: s2pul  
 Solvent: CDCl3  
 Ambient temperature  
 GEMINI-300BB "varian2"  
 Relax. delay 1.502 sec  
 Pulse 45.0 degrees  
 Acq. time 3.200 sec  
 Width 5000.0 Hz  
 24 repetitions  
 OBSERVE HL, 300.0672325 MHz  
 DATA PROCESSING  
 FT size 32768  
 Total time 5 min, 37 sec

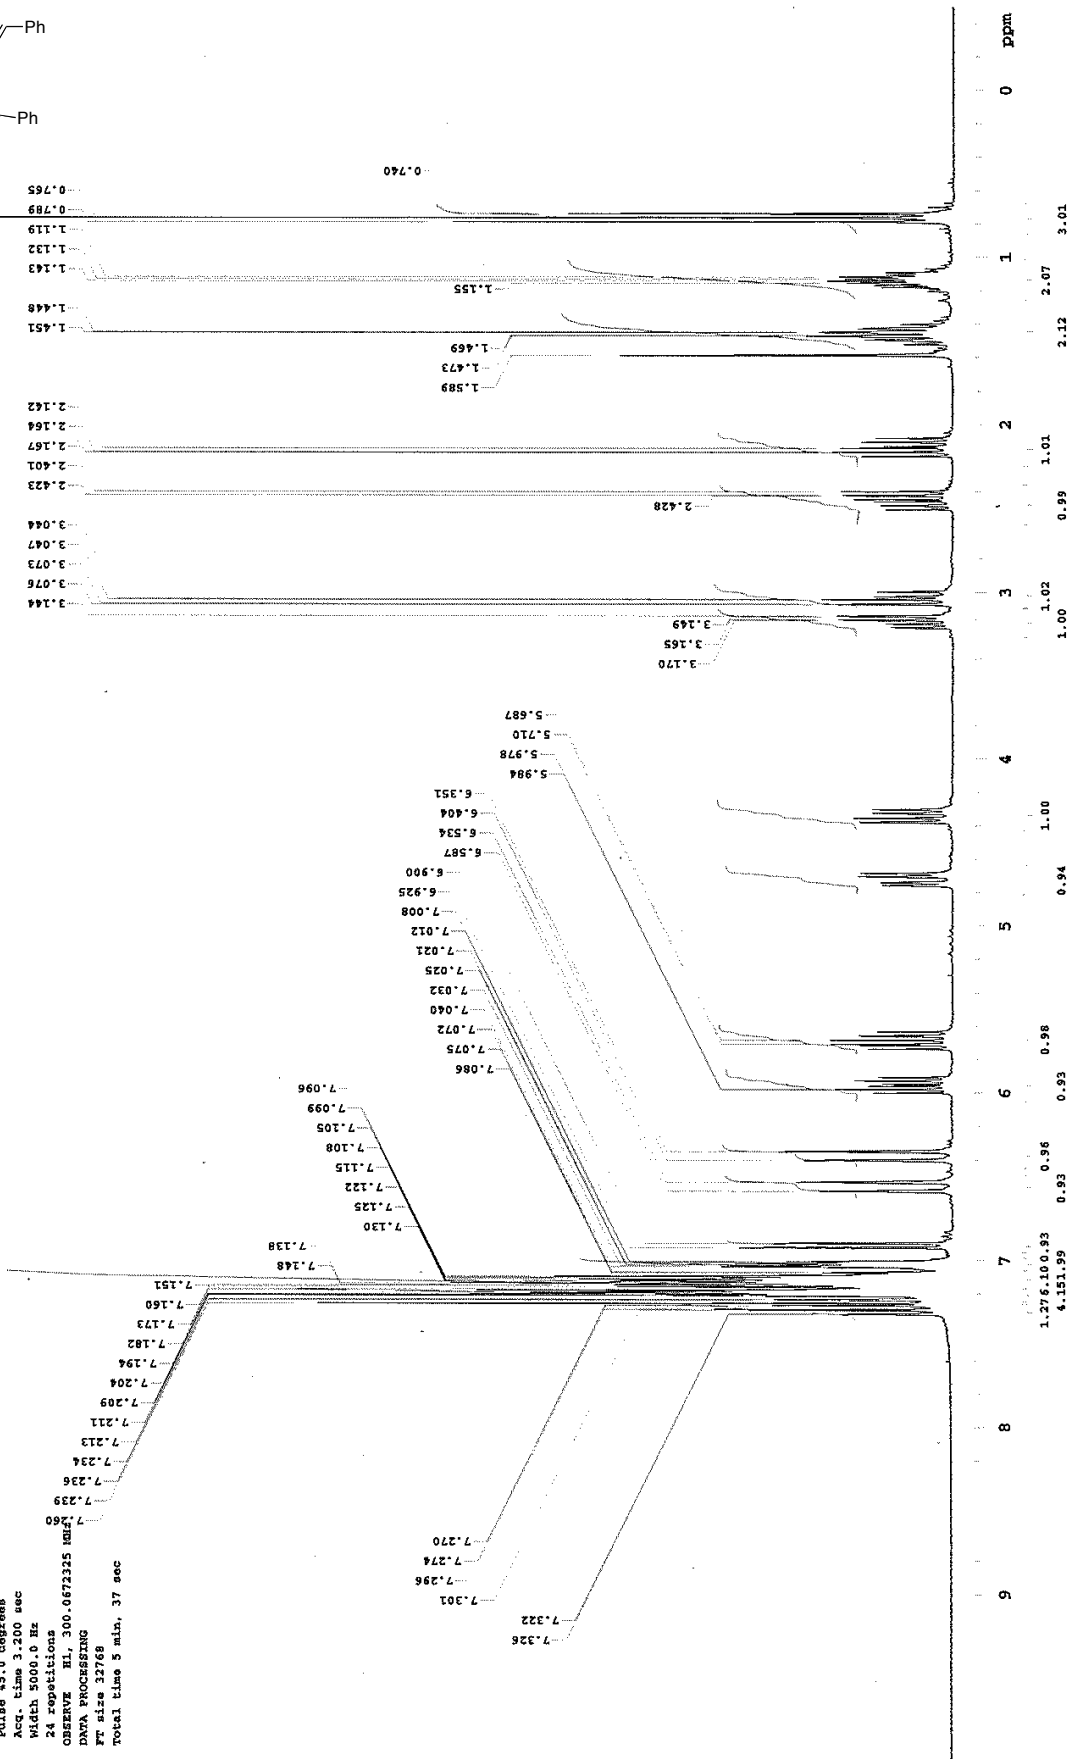

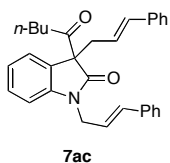

Relax. delay 1.159 sec  
 Pulse 45.0 degrees  
 Acq. time 0.842 sec  
 Width 19000.0 Hz  
 16556 repetitions  
 OBSERVE C13, 75.4519721 MHz  
 DECOUPLE W1, 300.0687135 MHz  
 Power 37 dB  
 continuously on  
 WALTZ-16 modulated  
 DATA PROCESSING  
 Line broadening 1.0 Hz  
 FT size 32768  
 Total time 601 hr, 21 min, 17 sec

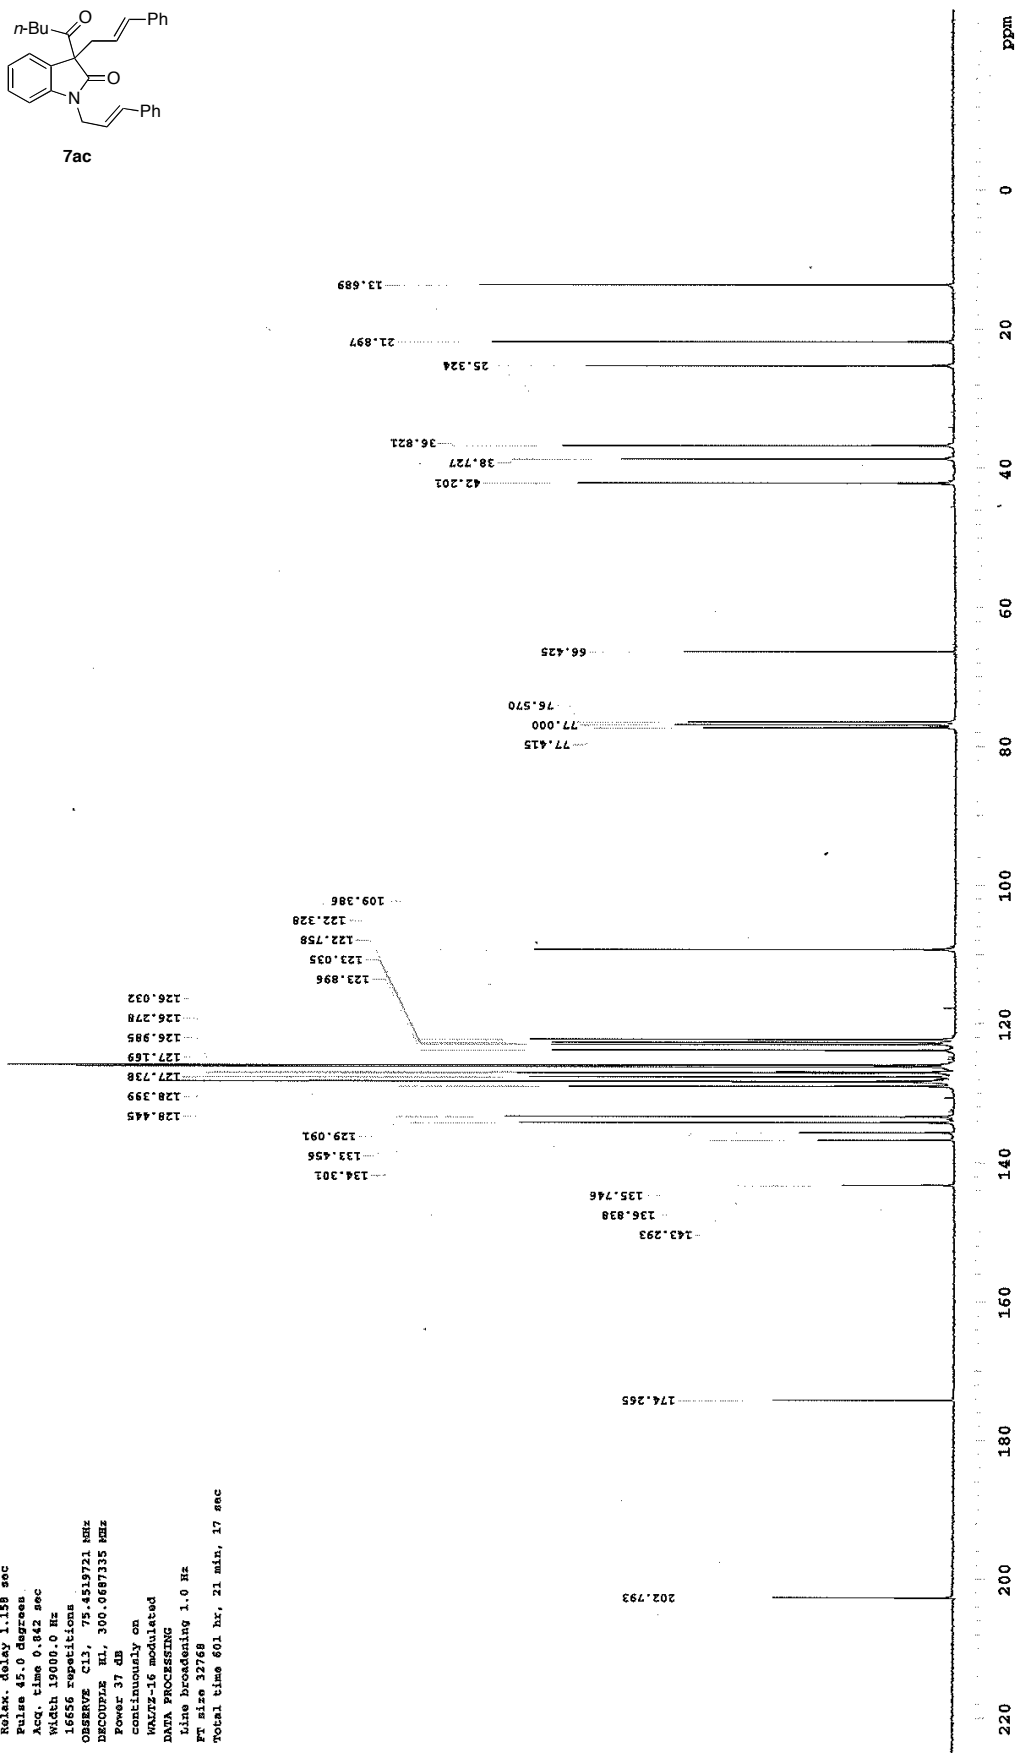

Supplement: Supplementary file 1 [file 4397752]
